# Supplementary material for: Valorisation of urban waste to access low-cost heterogeneous palladium catalysts for cross-coupling reactions in biomass-derived γ-valerolactone
Source: Royal Society of Chemistry journal article supplement (doi:10.1039/d1gc01707a), 2021-01-01

## ELETTRONIC SUPPLEMENTARY INFORMATION

### **Valorisation of urban waste to access low-cost heterogeneous palladium catalyst for cross-coupling reactions in biomass-derived $\gamma$ -valerolactone.**

*Federica Valentini,<sup>a†</sup> Francesco Ferlin,<sup>a†</sup> Simone Lilli,<sup>a</sup> Assunta Marrocchi,<sup>a</sup> Ping Liu,<sup>b</sup> Yanlong Gu,<sup>\*c</sup> Luigi Vaccaro<sup>\*a</sup>*

*<sup>a</sup> Laboratory of Green S.O.C. – Dipartimento di Chimica, biologia e Biotecnologie, Università degli Studi di Perugia, Via Elce di Sotto 8, 06123 – Perugia – I; E-mail: luigi.vaccaro@unipg.it; Web:www.dcbb.unipg.it/greensoc.*

*<sup>b</sup> School of Chemistry and Chemical Engineering, Shihezi University, Shihezi, Xinjiang 832003, China.*

*<sup>c</sup> Key Laboratory of Material Chemistry for Energy Conversion and Storage, Ministry of Education, Hubei Key Laboratory of Material Chemistry and Service Failure, School of Chemistry and Chemical Engineering, Huazhong University of Science and Technology, 1037 Luoyu road, Hongshan District, Wuhan 430074, China*

*<sup>†</sup> The authors have contributed equally.*

#### Table of contents

|                                                   |        |
|---------------------------------------------------|--------|
| 1. General remarks                                | ESI-2  |
| 2. General procedures                             | ESI-3  |
| 3. Characterization data                          | ESI-6  |
| 4. <sup>1</sup> H and <sup>13</sup> C NMR spectra | ESI-34 |

## 1. General Remarks

Unless otherwise stated, all chemicals were purchased and used without any further purification. GLC analyses were performed by using Hewlett-Packard HP 5890 SERIES II equipped with a capillary column DB-5MS (30 m, 0.32 mm), a FID detector, and helium as gas carrier. GC-EIMS analyses were carried out by using a Hewlett-Packard HP 6890N Network GC system/5975 mass selective detector equipped with an electron impact ionizer at 70 eV. Melting points were measured on a Büchi 510 apparatus. NMR spectra were recorded on a Bruker DRX-ADVANCE 400 MHz ( $^1\text{H}$  at 400 MHz,  $^{13}\text{C}$  at 100.6 MHz and  $^{19}\text{F}$  at 376.4 MHz) in  $\text{CDCl}_3$ . Chemical shifts are reported in ppm ( $\delta$ ), coupling constant (J) in hertz and multiplicity are reported as follows: *s* = singlet, *bs* = broad singlet, *d* = doublet, *dd* = double doublet, *td* = double triplet, *t* = triplet, *m* = multiplet. Products purification was performed using 230-400 mesh silica gel. Elemental Analysis (EA) were conducted on Elementar UNICUBE® elemental analyzer. Metal loading was measured using MP-AES 4210 instrument. TEM images were obtained using a PHILIPS CM 12 transmission electron microscopy operating in the range 20 to 120 kV with an image resolution of 0.34nm.

Characterization data,  $^1\text{H}$  and  $^{13}\text{C}$  NMR spectra are reported below.

## 2. General procedures

### Pine needle pre-treatment

Pine needles from urban waste were chopped into pieces of 1-2 cm and dried at 110°C for 1 day.<sup>1</sup> Then, the dry biomass was grinded and sieved. 7.05 g of the obtained material was extracted in Soxhlet apparatus with toluene methanol azeotrope (98% recovered) for 8h in order to remove oil, waxes and proteins and dried at 80°C under vacuum to afford 6.57 g of dry lignocellulosic biomass.<sup>2</sup>

### Preparation of PiNe support

1 g of the pre-treated pine needles material was placed in Erlenmeyer flask and sonicated for 30 min with 20 mL of sulfuric acid. After sonication, the material was kept in sulfuric acid for 3 days<sup>3</sup> and then filtered and washed several times with water until neutral pH. The recovered material (736 mg) was then dried under vacuum at 110°C. The formation of active carbon has been confirmed by methylene blue test.

### Preparation of Pd/PiNe

In a 50 mL two neck round bottom flask 400 mg of PiNe support were suspended in 20 mL of diethylene glycol. Aqueous solution of H<sub>2</sub>PdCl<sub>4</sub> (prepared dissolving 87 mg of PdCl<sub>2</sub> in 1 mL HCl) was added dropwise under sonication. The pH was adjusted to 12-13 by adding NaOH 5M solution. The reduction step has been carried out at 130°C for 3h under Ar atmosphere. The suspension was filtered and washed several times with hot water.<sup>4</sup> The loading of Pd (9.9 wt%) was measured by MP-AES analysis.

### Typical procedure for Heck-Mizoroki reaction (extraction work up).

In a 4 mL screw-capped vial equipped with a magnetic stirrer, the aryl iodide **1** (1mmol), the alkene **2** or **4** (1.2 mmol), GVL (0.8 M, 1.25 mL), diethylaminomethyl-polystyrene (1.5 equiv, 0.47 g) and **Pd/PiNe** (0.1 mol%, 1.1 mg) were consecutively added, and the resulting mixture was left under stirring at 130 °C. After 4 h, the heterogeneous base and catalyst were filtered off and washed with 1 mL of GVL. The solvent was distilled and recovered (94%) as pure solvent and the product extracted with 3 mL of CPME. The organic phase was washed with water (3x2 mL), dried over Na<sub>2</sub>SO<sub>4</sub> and the solvent removed under vacuum to afford pure products **3** or **5**.

### Typical procedure for Heck-Mizoroki reaction (precipitation work up).

In a 4 mL screw-capped vial equipped with a magnetic stirrer, the aryl iodide **1** (1mmol), the alkene **2** or **4** (1.2 mmol), GVL (0.8 M, 1.25 mL), diethylaminomethyl-polystyrene (1.5 equiv, 0.47 g) and **Pd/PiNe** (0.1 mol%, 1.1 mg) were consecutively added, and the resulting mixture was left under stirring at 130 °C. After 4 h, the heterogeneous base and catalyst were filtered off and washed with 1 mL of GVL. The solvent was distilled and recovered (94%) as pure solvent and the product precipitated with 1 mL of water at 0°C. The precipitate was filtered off and washed with 1 mL of cold water, then dried under vacuum to afford compounds **3** or **5**.

### Regeneration procedure for PS-TEA.

The catalyst-base system (470.3 mg) filtered from the reaction mixture was charged into a screw-capped vial equipped with a magnetic stirrer, and TEA (1 eq, 1.5 mmol, 209 µL) in 1 mL GVL was added. The mixture was kept under stirring for 30 min, at 28°C. Next, the catalyst-base system was filtered off, washed with 1 mL of GVL, and dried under vacuum. GVL was distilled and recovered (94%) as pure solvent.

### Typical procedure for Hiyama reaction.

In a 4 mL screw-capped vial equipped with a magnetic stirrer, the aryl halide **1** (1mmol), the silane **6** (1.5 mmol), GVL:H<sub>2</sub>O (4:1, 1 mL), TBAF (1.5 equiv, 488 mg) and **Pd/PiNe** (0.5 mol%, 5.3 mg) were consecutively added, and the resulting mixture was left under stirring at 130 °C. After 20 h, the catalyst was filtered off and washed with 1 mL of GVL. The product was precipitated with 1 mL of water at 0°C. The precipitate was filtered off, washed with 1 mL of cold water, and purified by column chromatography (petroleum ether:EtOAc, 95:5) to afford product **7**.

### Typical procedure for consecutive Hiyama-Heck reaction.

In a 4 mL screw-capped vial equipped with a magnetic stirrer, the aryl halide **1** (1mmol), the silane **6c** (1.5 mmol), GVL (0.8 mL), aq. t-Bu-phenol (7μM, 0.2 mL) TBAF (1.5 equiv, 488 mg) and **Pd/PiNe** (0.5 mol%, 5.3 mg) were consecutively added, and the resulting mixture was left under stirring at 130 °C. After 16 h, aryl iodide **1a** (1.1 eq) was added and the mixture was kept under stirring at 130°C. After 3 h, the catalyst was filtered off and washed with 1 mL of GVL. The crude was precipitated with 1 mL of water at 0°C and pure product purified by column chromatography (petroleum ether:EtOAc, 95:5).

### General procedure for leaching determination

The crude reaction mixture, after separation from the catalyst/ base system was dried under vacuum, dissolved in 2 mL of aqua regia, and stirred for 1h at room temperature. The mixture was transferred in a 10 mL graduated flask and Milli-Q water was added to reach the final volume. If present, residual solid was filtered off and the sample was analyzed by MP-AES 4210 instrument.

**Table ESI-1.** Optimization of consecutive Hiyama-Heck reaction with **Pd/PiNe** catalyst.

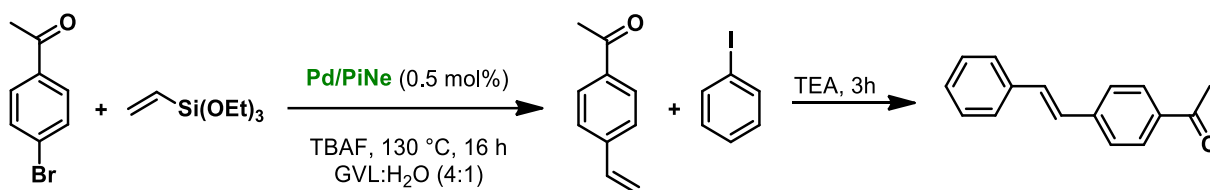

| Entry            | 6c (eq) | TBAF (eq) | 1a (eq) | Conv (%) | Sel (%) |
|------------------|---------|-----------|---------|----------|---------|
| 1                | 1.5     | 1.5       | 1.1     | 87       | 49      |
| 2                | 1       | 1.1       | 1.2     | 74       | 59      |
| 3 <sup>a</sup>   | 1       | 1.25      | 1.2     | 79       | 68      |
| 4 <sup>a</sup>   | 1       | 1.5       | 1.5     | >99      | 58      |
| 5 <sup>a,b</sup> | 1       | 1.5       | 1.5     | 84       | 77      |

Reaction conditions: **1f** (1 mmol), **6c**, **Pd/PiNe** (0.5 mol%), TBAF, GVL:H<sub>2</sub>O (4:1), 130°C, 16 h. **1a**, TEA (1.5 eq), 130°C, 3h. <sup>a</sup>20% of 7μM aq solution of t-Bu phenol was used in GVL as reaction medium. <sup>b</sup>reaction performed without TEA.

## References:

1. Varma, A. K.; Mondal, P.; *J. Therm. Anal. Calorim*, 2016, 124, 487-497
2. Xiao, S.; Gao, R.; Lu, Y.; Li, J.; Sun, Q.; *Carbohydrates Polymers*, **2015**, 119, 202-209
3. Kiruba, V. S. A.; Dakshinamurthy, A.; Subramanian, P. S.; Selvakumar, P. M.; *Journal of Experimental Nanoscience*, **2013**, DOI: 10.1080/17458080.2013.848295
4. Li, H.; Sun, G.; Li, N.; Su, D.; Xin, Q.; *J. Phys. Chem. C* **2007**, 111, 5605-5617

### 3. Characterization data

|                                                                                                                                                                                                                                                                                                                                                                                                                                                                                                                                                                                                                                                                                                                      |                                                                                                                                                                                     |             |                        |            |
|----------------------------------------------------------------------------------------------------------------------------------------------------------------------------------------------------------------------------------------------------------------------------------------------------------------------------------------------------------------------------------------------------------------------------------------------------------------------------------------------------------------------------------------------------------------------------------------------------------------------------------------------------------------------------------------------------------------------|-------------------------------------------------------------------------------------------------------------------------------------------------------------------------------------|-------------|------------------------|------------|
| <b>Chem.Name</b>                                                                                                                                                                                                                                                                                                                                                                                                                                                                                                                                                                                                                                                                                                     | Methyl cinnamate ( <b>3aa</b> )                                                                                                                                                     |             |                        |            |
| <b>Lit.Ref</b>                                                                                                                                                                                                                                                                                                                                                                                                                                                                                                                                                                                                                                                                                                       | F. Valentini, H. Mahmoudi, L. A. Bivona, O. Piermatti, M. Bagherzadeh, L. Fusaro, C. Aprile, A. Marrocchi, L. Vaccaro, <i>ACS Sustainable Chem. Eng.</i> 2019, <b>7</b> , 6939–6946 |             |                        |            |
| <p style="text-align: center;"> <math>\text{1 a} + \text{2 a} \xrightarrow[\text{GVL, 130}^\circ\text{C, 4h}]{\text{Pd/PiNe (0.1 mol\%), PS-TEA (1.5 eq)}} \text{3 aa}</math> </p> <p style="text-align: center;"><b>MW: 162,19 g/mol</b></p>                                                                                                                                                                                                                                                                                                                                                                                                                                                                        |                                                                                                                                                                                     |             |                        |            |
| <b>Method:</b>                                                                                                                                                                                                                                                                                                                                                                                                                                                                                                                                                                                                                                                                                                       |                                                                                                                                                                                     |             |                        |            |
| <p>Prepared according to general procedure: in a 4 mL screw-capped vial equipped with a magnetic stirrer catalyst <b>Pd/PiNe</b> (9.9 wt%, 1.1 mg, 0.1 mmol%), PS-TEA (469 mg, 1.5 mmol), iodobenzene <b>1a</b> (114 <math>\mu\text{L}</math>, 1 mmol, 97% purity), methyl acrylate <b>2a</b> (110 <math>\mu\text{L}</math>, 1.2 mmol, 98% purity) and 1.25 mL of GVL were consecutively added and the resulting mixture was left under stirring at 130 <math>^\circ\text{C}</math> for 4 h. After reaction completion the catalyst was removed through filtration and washed with 1 mL of GVL (94% recovered). The product <b>3aa</b> was isolated by precipitation work-up as white solid (149 mg, 92% yield).</p> |                                                                                                                                                                                     |             |                        |            |
| <b>Mol Formula</b>                                                                                                                                                                                                                                                                                                                                                                                                                                                                                                                                                                                                                                                                                                   | $\text{C}_{10}\text{H}_{10}\text{O}_2$                                                                                                                                              | <b>m.p.</b> | 36-38 $^\circ\text{C}$ |            |
| <b>Elemental Analysis:</b> Calc.: C: 74.06; H: 6.22; found: C: 74.08; H: 6.20.                                                                                                                                                                                                                                                                                                                                                                                                                                                                                                                                                                                                                                       |                                                                                                                                                                                     |             |                        |            |
| <b><math>^1\text{H}</math> NMR</b><br>(400 MHz, $\text{CDCl}_3$ )                                                                                                                                                                                                                                                                                                                                                                                                                                                                                                                                                                                                                                                    | $\delta$ value:                                                                                                                                                                     | No. H       | Mult                   | J value/Hz |
|                                                                                                                                                                                                                                                                                                                                                                                                                                                                                                                                                                                                                                                                                                                      | 7.70                                                                                                                                                                                | 1           | <i>d</i>               | 16.0       |
|                                                                                                                                                                                                                                                                                                                                                                                                                                                                                                                                                                                                                                                                                                                      | 7.54-7.51                                                                                                                                                                           | 2           | <i>m</i>               |            |
|                                                                                                                                                                                                                                                                                                                                                                                                                                                                                                                                                                                                                                                                                                                      | 7.40-7.37                                                                                                                                                                           | 3           | <i>m</i>               |            |
|                                                                                                                                                                                                                                                                                                                                                                                                                                                                                                                                                                                                                                                                                                                      | 6.45                                                                                                                                                                                | 1           | <i>d</i>               | 16.0       |
|                                                                                                                                                                                                                                                                                                                                                                                                                                                                                                                                                                                                                                                                                                                      | 3.81                                                                                                                                                                                | 3           | <i>s</i>               |            |
| <b><math>^{13}\text{C}</math> NMR (100.6 Hz, <math>\text{CDCl}_3</math>)</b> $\delta$ : 167.6, 145.0, 134.5, 130.4, 129.0, 128.2, 117.9, 51.8                                                                                                                                                                                                                                                                                                                                                                                                                                                                                                                                                                        |                                                                                                                                                                                     |             |                        |            |
| <b>GC-EIMS (m/z, %):</b> 162 ( $\text{M}^+$ , 50), 161 (25), 131 (100), 103 (71), 102 (25), 77(39), 51 (22).                                                                                                                                                                                                                                                                                                                                                                                                                                                                                                                                                                                                         |                                                                                                                                                                                     |             |                        |            |

|                                                                                                                                                                                                                                                   |                                                                                                                                                                                                                                                                                                                                                                                                                                                                                                                                                                                                                                                                                                                      |             |          |            |
|---------------------------------------------------------------------------------------------------------------------------------------------------------------------------------------------------------------------------------------------------|----------------------------------------------------------------------------------------------------------------------------------------------------------------------------------------------------------------------------------------------------------------------------------------------------------------------------------------------------------------------------------------------------------------------------------------------------------------------------------------------------------------------------------------------------------------------------------------------------------------------------------------------------------------------------------------------------------------------|-------------|----------|------------|
| <b>Chem.Name</b>                                                                                                                                                                                                                                  | Benzyl cinnamate ( <b>3ab</b> )                                                                                                                                                                                                                                                                                                                                                                                                                                                                                                                                                                                                                                                                                      |             |          |            |
| <b>Lit.Ref</b>                                                                                                                                                                                                                                    | J. Tummatorn, P. A. Albiniak, G. B. Dudley <i>J. Org. Chem.</i> 2007, <b>72</b> , 8962–8964                                                                                                                                                                                                                                                                                                                                                                                                                                                                                                                                                                                                                          |             |          |            |
| <p style="text-align: center;"> <math>\text{1a} + \text{2b} \xrightarrow[\text{GVL, 130}^\circ\text{C, 4h}]{\text{Pd/PiNe (0.1 mol\%), PS-TEA (1.5 eq)}} \text{3ab}</math> </p> <p style="text-align: right;"><b>3ab</b><br/>MW: 238,28 g/mol</p> |                                                                                                                                                                                                                                                                                                                                                                                                                                                                                                                                                                                                                                                                                                                      |             |          |            |
| <b>Method:</b>                                                                                                                                                                                                                                    | <p>Prepared according to general procedure: in a 4 mL screw-capped vial equipped with a magnetic stirrer catalyst <b>Pd/PiNe</b> (9.9 wt%, 1.1 mg, 0.1 mmol%), PS-TEA (469 mg, 1.5 mmol), iodobenzene <b>1a</b> (114 <math>\mu\text{L}</math>, 1 mmol, 97% purity), benzyl acrylate <b>2b</b> (189 <math>\mu\text{L}</math>, 1.2 mmol, 98% purity) and 1.25 mL of GVL were consecutively added and the resulting mixture was left under stirring at 130 <math>^\circ\text{C}</math> for 4 h. After reaction completion the catalyst was removed through filtration and washed with 1 mL of GVL (94% recovered). The product <b>3ab</b> was isolated by extraction work-up as colourless oil (235 mg, 99% yield).</p> |             |          |            |
| <b>Mol Formula</b>                                                                                                                                                                                                                                | $\text{C}_{16}\text{H}_{14}\text{O}_2$                                                                                                                                                                                                                                                                                                                                                                                                                                                                                                                                                                                                                                                                               | <b>m.p.</b> | oil      |            |
| <b>Elemental Analysis:</b> Calc.: C: 80.65; H: 5.92; found: C: 80.63; H: 5.93.                                                                                                                                                                    |                                                                                                                                                                                                                                                                                                                                                                                                                                                                                                                                                                                                                                                                                                                      |             |          |            |
| <b><math>^1\text{H NMR}</math><br/>(400 MHz, <math>\text{CDCl}_3</math>)</b>                                                                                                                                                                      | $\delta$ value:                                                                                                                                                                                                                                                                                                                                                                                                                                                                                                                                                                                                                                                                                                      | No. H       | Mult     | J value/Hz |
|                                                                                                                                                                                                                                                   | 7.74                                                                                                                                                                                                                                                                                                                                                                                                                                                                                                                                                                                                                                                                                                                 | 1           | <i>d</i> | 16.0       |
|                                                                                                                                                                                                                                                   | 7.54-7.45                                                                                                                                                                                                                                                                                                                                                                                                                                                                                                                                                                                                                                                                                                            | 2           | <i>m</i> |            |
|                                                                                                                                                                                                                                                   | 7.45-7.35                                                                                                                                                                                                                                                                                                                                                                                                                                                                                                                                                                                                                                                                                                            | 8           | <i>m</i> |            |
|                                                                                                                                                                                                                                                   | 6.40                                                                                                                                                                                                                                                                                                                                                                                                                                                                                                                                                                                                                                                                                                                 | 1           | <i>d</i> | 16.0       |
|                                                                                                                                                                                                                                                   | 5.27                                                                                                                                                                                                                                                                                                                                                                                                                                                                                                                                                                                                                                                                                                                 | 2           | <i>s</i> |            |
| <b><math>^{13}\text{C NMR}</math> (100.6 Hz, <math>\text{CDCl}_3</math>) <math>\delta</math>:</b> 166.9, 145.3, 136.2, 134.5, 129.0, 128.7, 128.4, 128.4, 128.2, 118.0, 66.5.                                                                     |                                                                                                                                                                                                                                                                                                                                                                                                                                                                                                                                                                                                                                                                                                                      |             |          |            |
| <b>GC-EIMS (m/z, %):</b> 238 (m+, 30), 193 (66), 192 (100), 178 (11), 132 (11), 131 (84), 115 (18), 104 (15), 103 (47), 91 (92), 77 (51), 65 (20), 51 (22)                                                                                        |                                                                                                                                                                                                                                                                                                                                                                                                                                                                                                                                                                                                                                                                                                                      |             |          |            |

|                                                                                                                                                                                                                                              |                                                                                                                                                                                                                                                                                                                                                                                                                                                                                                                                                                                                                                                                                |             |            |            |
|----------------------------------------------------------------------------------------------------------------------------------------------------------------------------------------------------------------------------------------------|--------------------------------------------------------------------------------------------------------------------------------------------------------------------------------------------------------------------------------------------------------------------------------------------------------------------------------------------------------------------------------------------------------------------------------------------------------------------------------------------------------------------------------------------------------------------------------------------------------------------------------------------------------------------------------|-------------|------------|------------|
| <b>Chem.Name</b>                                                                                                                                                                                                                             | (E)-methyl 3-(3-nitrophenyl)acrylate ( <b>3ba</b> )                                                                                                                                                                                                                                                                                                                                                                                                                                                                                                                                                                                                                            |             |            |            |
| <b>Lit.Ref</b>                                                                                                                                                                                                                               | J. Ruan, X. Li, O. Saidi, J. Xiao. <i>J. Am. Chem. Soc.</i> 2008, <b>130</b> , 2424–2425                                                                                                                                                                                                                                                                                                                                                                                                                                                                                                                                                                                       |             |            |            |
| <p style="text-align: center;"> <math>\text{Pd/PiNe (0.1 mol\%), PS-TEA (1.5 eq)}</math><br/> <math>\text{GVL, 130}^\circ\text{C, 4h}</math> </p> <p style="text-align: center;"><b>1b</b> + <b>2a</b> → <b>3ba</b><br/>MW: 207,05 g/mol</p> |                                                                                                                                                                                                                                                                                                                                                                                                                                                                                                                                                                                                                                                                                |             |            |            |
| <b>Method:</b>                                                                                                                                                                                                                               | <p>Prepared according to general procedure: in a 4 mL screw-capped vial equipped with a magnetic stirrer catalyst <b>Pd/PiNe</b> (9.9 wt%, 1.1 mg, 0.1 mmol%), PS-TEA (469 mg, 1.5 mmol), 1-iodo-3-nitrobenzene <b>1b</b> (251 mg, 1 mmol, 99% purity), methyl acrylate <b>2a</b> (110 <math>\mu</math>L, 1.2 mmol, 98% purity) and 1.25 mL of GVL were consecutively added and the resulting mixture was left under stirring at 130 °C for 4 h. After reaction completion the catalyst was removed through filtration and washed with 1 mL of GVL (94% recovered). The product <b>3ba</b> was isolated by precipitation work-up as pale-yellow solid (186 mg, 90% yield).</p> |             |            |            |
| <b>Mol Formula</b>                                                                                                                                                                                                                           | C <sub>10</sub> H <sub>9</sub> NO <sub>4</sub>                                                                                                                                                                                                                                                                                                                                                                                                                                                                                                                                                                                                                                 | <b>m.p.</b> | 122-124 °C |            |
| <b>Elemental Analysis:</b> Calc.: C: 57.97; H: 4.38; N: 6.76; found: C: 57.99; H: 4.37; N: 6.78;                                                                                                                                             |                                                                                                                                                                                                                                                                                                                                                                                                                                                                                                                                                                                                                                                                                |             |            |            |
| <b><sup>1</sup>H NMR</b><br><b>(400 MHz, CDCl<sub>3</sub>)</b>                                                                                                                                                                               | $\delta$ value:                                                                                                                                                                                                                                                                                                                                                                                                                                                                                                                                                                                                                                                                | No. H       | Mult       | J value/Hz |
|                                                                                                                                                                                                                                              | 8.38                                                                                                                                                                                                                                                                                                                                                                                                                                                                                                                                                                                                                                                                           | 1           | <i>s</i>   |            |
|                                                                                                                                                                                                                                              | 8.24                                                                                                                                                                                                                                                                                                                                                                                                                                                                                                                                                                                                                                                                           | 1           | <i>dd</i>  | 8.4 / 1.2  |
|                                                                                                                                                                                                                                              | 7.82                                                                                                                                                                                                                                                                                                                                                                                                                                                                                                                                                                                                                                                                           | 1           | <i>d</i>   | 8.0        |
|                                                                                                                                                                                                                                              | 7.73                                                                                                                                                                                                                                                                                                                                                                                                                                                                                                                                                                                                                                                                           | 1           | <i>d</i>   | 16.0       |
|                                                                                                                                                                                                                                              | 7.59                                                                                                                                                                                                                                                                                                                                                                                                                                                                                                                                                                                                                                                                           | 1           | <i>t</i>   | 8.0        |
|                                                                                                                                                                                                                                              | 7.56                                                                                                                                                                                                                                                                                                                                                                                                                                                                                                                                                                                                                                                                           | 1           | <i>d</i>   | 16.0       |
|                                                                                                                                                                                                                                              | 3.84                                                                                                                                                                                                                                                                                                                                                                                                                                                                                                                                                                                                                                                                           | 3           | <i>s</i>   |            |
| <b><sup>13</sup>C NMR (100.6 Hz, CDCl<sub>3</sub>)</b> $\delta$ : 166.7, 148.9, 142.1, 136.3, 133.8, 130.1, 124.7, 122.6, 121.1, 52.2.                                                                                                       |                                                                                                                                                                                                                                                                                                                                                                                                                                                                                                                                                                                                                                                                                |             |            |            |
| <b>GC-EIMS (m/z, %):</b> 207 (M+, 47), 190 (34), 177 (11), 176 (100), 130 (15), 129 (21), 118 (25), 102 (49), 75 (15), 51 (12), 50 (13).                                                                                                     |                                                                                                                                                                                                                                                                                                                                                                                                                                                                                                                                                                                                                                                                                |             |            |            |





|                                                                                                                                                                                                                                                                                                                                                                                                                                                                                                                                                                                                                                                                                               |                                                                                                                                                                                     |             |                    |            |
|-----------------------------------------------------------------------------------------------------------------------------------------------------------------------------------------------------------------------------------------------------------------------------------------------------------------------------------------------------------------------------------------------------------------------------------------------------------------------------------------------------------------------------------------------------------------------------------------------------------------------------------------------------------------------------------------------|-------------------------------------------------------------------------------------------------------------------------------------------------------------------------------------|-------------|--------------------|------------|
| <b>Chem.Name</b>                                                                                                                                                                                                                                                                                                                                                                                                                                                                                                                                                                                                                                                                              | (E)-methyl 3-(4-acetylphenyl)acrylate ( <b>3ca</b> )                                                                                                                                |             |                    |            |
| <b>Lit.Ref</b>                                                                                                                                                                                                                                                                                                                                                                                                                                                                                                                                                                                                                                                                                | F. Valentini, H. Mahmoudi, L. A. Bivona, O. Piermatti, M. Bagherzadeh, L. Fusaro, C. Aprile, A. Marrocchi, L. Vaccaro, <i>ACS Sustainable Chem. Eng.</i> 2019, <b>7</b> , 6939–6946 |             |                    |            |
| <p style="text-align: center;"> <chem>CC(=O)c1ccc(I)cc1</chem> (<b>1c</b>) + <chem>C=CC(=O)OC</chem> (<b>2a</b>) <math>\xrightarrow[\text{GVL, 130}^\circ\text{C, 4h}]{\text{Pd/PiNe (0.1 mol\%), PS-TEA (1.5 eq)}}</math> <chem>CC(=O)c1ccc(C=C(C)C(=O)OC)cc1</chem> (<b>3ca</b>)<br/> <b>MW: 204,08 g/mol</b> </p>                                                                                                                                                                                                                                                                                                                                                                          |                                                                                                                                                                                     |             |                    |            |
| <b>Method:</b>                                                                                                                                                                                                                                                                                                                                                                                                                                                                                                                                                                                                                                                                                |                                                                                                                                                                                     |             |                    |            |
| <p>Prepared according to general procedure: in a 4 mL screw-capped vial equipped with a magnetic stirrer catalyst <b>Pd/PiNe</b> (9.9 wt%, 1.1 mg, 0.1 mmol%), PS-TEA (469 mg, 1.5 mmol), 4-iodoacetophenone <b>1c</b> (249 mg, 1 mmol, 99% purity), methyl acrylate <b>2a</b> (110 <math>\mu</math>L, 1.2 mmol, 98% purity) and 1.25 mL of GVL were consecutively added and the resulting mixture was left under stirring at 130 <math>^\circ</math>C for 4 h. After reaction completion the catalyst was removed through filtration and washed with 1 mL of GVL (94% recovered). The product <b>3ca</b> was isolated by precipitation work-up as pale yellow solid (191 mg, 94% yield).</p> |                                                                                                                                                                                     |             |                    |            |
| <b>Mol Formula</b>                                                                                                                                                                                                                                                                                                                                                                                                                                                                                                                                                                                                                                                                            | $\text{C}_{12}\text{H}_{12}\text{O}_3$                                                                                                                                              | <b>m.p.</b> | 104-106 $^\circ$ C |            |
| <b>Elemental Analysis:</b> Calc.: C: 70.58; H: 5.92; found: C: 70.61; H: 5.93.                                                                                                                                                                                                                                                                                                                                                                                                                                                                                                                                                                                                                |                                                                                                                                                                                     |             |                    |            |
| <b><math>^1\text{H NMR}</math><br/>(400 MHz, <math>\text{CDCl}_3</math>)</b>                                                                                                                                                                                                                                                                                                                                                                                                                                                                                                                                                                                                                  | $\delta$ value:                                                                                                                                                                     | No. H       | Mult               | J value/Hz |
|                                                                                                                                                                                                                                                                                                                                                                                                                                                                                                                                                                                                                                                                                               | 7.97                                                                                                                                                                                | 2           | <i>d</i>           | 8.0        |
|                                                                                                                                                                                                                                                                                                                                                                                                                                                                                                                                                                                                                                                                                               | 7.71                                                                                                                                                                                | 1           | <i>d</i>           | 16.0       |
|                                                                                                                                                                                                                                                                                                                                                                                                                                                                                                                                                                                                                                                                                               | 7.61                                                                                                                                                                                | 2           | <i>d</i>           | 8.0        |
|                                                                                                                                                                                                                                                                                                                                                                                                                                                                                                                                                                                                                                                                                               | 6.53                                                                                                                                                                                | 1           | <i>d</i>           | 16.0       |
|                                                                                                                                                                                                                                                                                                                                                                                                                                                                                                                                                                                                                                                                                               | 3.83                                                                                                                                                                                | 3           | <i>s</i>           |            |
|                                                                                                                                                                                                                                                                                                                                                                                                                                                                                                                                                                                                                                                                                               | 2.62                                                                                                                                                                                | 3           | <i>s</i>           |            |
| <b><math>^{13}\text{C NMR}</math> (100.6 Hz, <math>\text{CDCl}_3</math>) <math>\delta</math>:</b> 197.5, 167.1, 143.5, 138.9, 138.2, 129.0, 128.3, 120.5, 52.1, 26.8                                                                                                                                                                                                                                                                                                                                                                                                                                                                                                                          |                                                                                                                                                                                     |             |                    |            |
| <b>GC-EIMS (m/z, %):</b> 205 (22), 204 ( $\text{M}^+$ , 100), 190 (34), 189 (81), 188 (24), 173 (24), 161 (62), 131 (37), 130 (16), 129 (27), 118 (26), 103 (20), 102 (72), 101 (18), 76 (31), 75 (24), 74 (16), 51 (26), 50 (19).                                                                                                                                                                                                                                                                                                                                                                                                                                                            |                                                                                                                                                                                     |             |                    |            |

|                                                                                                                                                                                                                                                                                                                       |                                                                                                                                                                                                                                                                                                                                                                                                                                                                                                                                                                                                                                                                                      |             |          |            |
|-----------------------------------------------------------------------------------------------------------------------------------------------------------------------------------------------------------------------------------------------------------------------------------------------------------------------|--------------------------------------------------------------------------------------------------------------------------------------------------------------------------------------------------------------------------------------------------------------------------------------------------------------------------------------------------------------------------------------------------------------------------------------------------------------------------------------------------------------------------------------------------------------------------------------------------------------------------------------------------------------------------------------|-------------|----------|------------|
| <b>Chem.Name</b>                                                                                                                                                                                                                                                                                                      | (E)-benzyl 3-(4-acetylphenyl)acrylate ( <b>3cb</b> )                                                                                                                                                                                                                                                                                                                                                                                                                                                                                                                                                                                                                                 |             |          |            |
| <b>Lit.Ref</b>                                                                                                                                                                                                                                                                                                        | T. Ichikawa, M. Mizuno, S. Ueda, N. Ohneda, H. Odajima, Y. Sawama, Y. Monguchia, H. Sajiki <i>Tetrahedron</i> , 2018, <b>74</b> , 1810-1816                                                                                                                                                                                                                                                                                                                                                                                                                                                                                                                                          |             |          |            |
| <p style="text-align: center;"> <chem>CC(=O)c1ccc(I)cc1</chem> (<b>1c</b>) + <chem>C=CC(=O)OCC</chem> (<b>2b</b>) <math>\xrightarrow[\text{GVL, 130}^\circ\text{C, 4h}]{\text{Pd/PiNe (0.1 mol\%), PS-TEA (1.5 eq)}}</math> <chem>CC(=O)c1ccc(C=C(C(=O)OCC))cc1</chem> (<b>3cb</b>)<br/> <b>MW: 280,32 g/mol</b> </p> |                                                                                                                                                                                                                                                                                                                                                                                                                                                                                                                                                                                                                                                                                      |             |          |            |
| <b>Method:</b>                                                                                                                                                                                                                                                                                                        | <p>Prepared according to general procedure: in a 4 mL screw-capped vial equipped with a magnetic stirrer catalyst <b>Pd/PiNe</b> (9.9 wt%, 1.1 mg, 0.1 mmol%), PS-TEA (469 mg, 1.5 mmol), 4-iodoacetophenone <b>1c</b> (249 mg, 1 mmol, 99% purity), benzyl acrylate <b>2b</b> (189 <math>\mu</math>L, 1.2 mmol, 98% purity) and 1.25 mL of GVL were consecutively added and the resulting mixture was left under stirring at 130 <math>^\circ</math>C for 4 h. After reaction completion the catalyst was removed through filtration and washed with 1 mL of GVL (94% recovered). The product <b>3cb</b> was isolated by extraction work-up as white solid (277 mg, 98% yield).</p> |             |          |            |
| <b>Mol Formula</b>                                                                                                                                                                                                                                                                                                    | $\text{C}_{18}\text{H}_{16}\text{O}_3$                                                                                                                                                                                                                                                                                                                                                                                                                                                                                                                                                                                                                                               | <b>m.p.</b> |          |            |
| <b>Elemental Analysis:</b> Calc.: C: 77.12; H: 5.75; found: C: 77.13; H: 5.75                                                                                                                                                                                                                                         |                                                                                                                                                                                                                                                                                                                                                                                                                                                                                                                                                                                                                                                                                      |             |          |            |
| <b><math>^1\text{H NMR}</math><br/>(400 MHz, <math>\text{CDCl}_3</math>)</b>                                                                                                                                                                                                                                          | $\delta$ value:                                                                                                                                                                                                                                                                                                                                                                                                                                                                                                                                                                                                                                                                      | No. H       | Mult     | J value/Hz |
|                                                                                                                                                                                                                                                                                                                       | 7.97                                                                                                                                                                                                                                                                                                                                                                                                                                                                                                                                                                                                                                                                                 | 2           | <i>d</i> | 8.0        |
|                                                                                                                                                                                                                                                                                                                       | 7.73                                                                                                                                                                                                                                                                                                                                                                                                                                                                                                                                                                                                                                                                                 | 1           | <i>d</i> | 16.0       |
|                                                                                                                                                                                                                                                                                                                       | 7.60                                                                                                                                                                                                                                                                                                                                                                                                                                                                                                                                                                                                                                                                                 | 2           | <i>d</i> | 8.0        |
|                                                                                                                                                                                                                                                                                                                       | 7.44-7.35                                                                                                                                                                                                                                                                                                                                                                                                                                                                                                                                                                                                                                                                            | 5           | <i>m</i> |            |
|                                                                                                                                                                                                                                                                                                                       | 6.57                                                                                                                                                                                                                                                                                                                                                                                                                                                                                                                                                                                                                                                                                 | 1           | <i>d</i> | 16.0       |
|                                                                                                                                                                                                                                                                                                                       | 5.27                                                                                                                                                                                                                                                                                                                                                                                                                                                                                                                                                                                                                                                                                 | 2           | <i>s</i> |            |
|                                                                                                                                                                                                                                                                                                                       | 2.61                                                                                                                                                                                                                                                                                                                                                                                                                                                                                                                                                                                                                                                                                 | 3           | <i>s</i> |            |
| <b><math>^{13}\text{C NMR}</math> (100.6 Hz, <math>\text{CDCl}_3</math>) <math>\delta</math>:</b> 197.4, 166.4, 143.7, 138.8, 138.2, 136.0, 129.0, 128.8, 128.5, 128.5, 128.3, 120.6, 66.8, 26.8.                                                                                                                     |                                                                                                                                                                                                                                                                                                                                                                                                                                                                                                                                                                                                                                                                                      |             |          |            |
| <b>GC-EIMS (m/z, %):</b> 281 (20), 280 (M+, 100), 265 (37), 237 (27), 236 (12), 235 (57), 234 (59), 219 (15), 193 (17), 197 (14), 191 (22), 173 (50), 115 (13), 91 (94), 77 (13), 65 (13)                                                                                                                             |                                                                                                                                                                                                                                                                                                                                                                                                                                                                                                                                                                                                                                                                                      |             |          |            |

|                                                                                                                                                                                                                                                                                                                                                                                                                                                                                                                                                                                                                                                                                                  |                                                                                                                                                                                     |             |                        |            |
|--------------------------------------------------------------------------------------------------------------------------------------------------------------------------------------------------------------------------------------------------------------------------------------------------------------------------------------------------------------------------------------------------------------------------------------------------------------------------------------------------------------------------------------------------------------------------------------------------------------------------------------------------------------------------------------------------|-------------------------------------------------------------------------------------------------------------------------------------------------------------------------------------|-------------|------------------------|------------|
| <b>Chem.Name</b>                                                                                                                                                                                                                                                                                                                                                                                                                                                                                                                                                                                                                                                                                 | (E)-methyl 3-(p-tolyl)acrylate ( <b>3da</b> )                                                                                                                                       |             |                        |            |
| <b>Lit.Ref</b>                                                                                                                                                                                                                                                                                                                                                                                                                                                                                                                                                                                                                                                                                   | F. Valentini, H. Mahmoudi, L. A. Bivona, O. Piermatti, M. Bagherzadeh, L. Fusaro, C. Aprile, A. Marrocchi, L. Vaccaro, <i>ACS Sustainable Chem. Eng.</i> 2019, <b>7</b> , 6939–6946 |             |                        |            |
| <p style="text-align: center;"> <math>\text{1d} + \text{2a} \xrightarrow[\text{GVL, 130}^\circ\text{C, 4h}]{\text{Pd/PiNe (0.1 mol\%), PS-TEA (1.5 eq)}} \text{3da}</math> </p> <p style="text-align: right;"><b>MW: 176,21 g/mol</b></p>                                                                                                                                                                                                                                                                                                                                                                                                                                                        |                                                                                                                                                                                     |             |                        |            |
| <b>Method:</b>                                                                                                                                                                                                                                                                                                                                                                                                                                                                                                                                                                                                                                                                                   |                                                                                                                                                                                     |             |                        |            |
| <p>Prepared according to general procedure: in a 4 mL screw-capped vial equipped with a magnetic stirrer catalyst <b>Pd/PiNe</b> (9.9 wt%, 1.1 mg, 0.1 mmol%), PS-TEA (469 mg, 1.5 mmol), 4-iodotoluene <b>1d</b> (220 mg, 1 mmol, 99% purity), methyl acrylate <b>2a</b> (110 <math>\mu\text{L}</math>, 1.2 mmol, 98% purity) and 1.25 mL of GVL were consecutively added and the resulting mixture was left under stirring at 130 <math>^\circ\text{C}</math> for 4 h. After reaction completion the catalyst was removed through filtration and washed with 1 mL of GVL (94% recovered). The product <b>3da</b> was isolated by precipitation work-up as white solid (162 mg, 92% yield).</p> |                                                                                                                                                                                     |             |                        |            |
| <b>Mol Formula</b>                                                                                                                                                                                                                                                                                                                                                                                                                                                                                                                                                                                                                                                                               | $\text{C}_{11}\text{H}_{12}\text{O}_2$                                                                                                                                              | <b>m.p.</b> | 54-56 $^\circ\text{C}$ |            |
| <b>Elemental Analysis:</b> Calc.: C: 74.98; H: 6.86; found: C: 75.01; H: 6.89.                                                                                                                                                                                                                                                                                                                                                                                                                                                                                                                                                                                                                   |                                                                                                                                                                                     |             |                        |            |
| <b><math>^1\text{H}</math> NMR<br/>(400 MHz, <math>\text{CDCl}_3</math>)</b>                                                                                                                                                                                                                                                                                                                                                                                                                                                                                                                                                                                                                     | $\delta$ value:                                                                                                                                                                     | No. H       | Mult                   | J value/Hz |
|                                                                                                                                                                                                                                                                                                                                                                                                                                                                                                                                                                                                                                                                                                  | 7.67                                                                                                                                                                                | 1           | <i>d</i>               | 16.0       |
|                                                                                                                                                                                                                                                                                                                                                                                                                                                                                                                                                                                                                                                                                                  | 7.42                                                                                                                                                                                | 2           | <i>d</i>               | 8.0        |
|                                                                                                                                                                                                                                                                                                                                                                                                                                                                                                                                                                                                                                                                                                  | 7.19                                                                                                                                                                                | 2           | <i>d</i>               | 8.0        |
|                                                                                                                                                                                                                                                                                                                                                                                                                                                                                                                                                                                                                                                                                                  | 6.39                                                                                                                                                                                | 1           | <i>d</i>               | 16.0       |
|                                                                                                                                                                                                                                                                                                                                                                                                                                                                                                                                                                                                                                                                                                  | 3.80                                                                                                                                                                                | 3           | <i>s</i>               |            |
|                                                                                                                                                                                                                                                                                                                                                                                                                                                                                                                                                                                                                                                                                                  | 2.37                                                                                                                                                                                | 3           | <i>s</i>               |            |
| <b><math>^{13}\text{C}</math> NMR (100.6 Hz, <math>\text{CDCl}_3</math>)</b> $\delta$ : 167.8, 145.0, 140.9, 131.8, 129.8, 128.2, 116.8, 51.8, 21.6.                                                                                                                                                                                                                                                                                                                                                                                                                                                                                                                                             |                                                                                                                                                                                     |             |                        |            |
| <b>GC-EIMS (m/z, %):</b> 176 ( $\text{M}^+$ , 100), 175 (56), 161 (22), 146 (40), 145 (100), 131 (16), 118 (25), 117 (100), 116 (56), 115 (100), 102 (17), 91 (67), 89 (25), 65 (32), 63 (26), 57 (16), 51 (16).                                                                                                                                                                                                                                                                                                                                                                                                                                                                                 |                                                                                                                                                                                     |             |                        |            |

|                                                                                                                                                                                                                                                    |                                                                                                                                                                                                                                                                                                                                                                                                                                                                                                                                                                                                                                                                                                  |             |          |            |
|----------------------------------------------------------------------------------------------------------------------------------------------------------------------------------------------------------------------------------------------------|--------------------------------------------------------------------------------------------------------------------------------------------------------------------------------------------------------------------------------------------------------------------------------------------------------------------------------------------------------------------------------------------------------------------------------------------------------------------------------------------------------------------------------------------------------------------------------------------------------------------------------------------------------------------------------------------------|-------------|----------|------------|
| <b>Chem.Name</b>                                                                                                                                                                                                                                   | (E)-benzyl 3-(p-tolyl)acrylate ( <b>3db</b> )                                                                                                                                                                                                                                                                                                                                                                                                                                                                                                                                                                                                                                                    |             |          |            |
| <b>Lit.Ref</b>                                                                                                                                                                                                                                     | J. Liu, Y. Wang, Y. Yue, N. Liu, J. Zhang, S. Zhao, Q. Tang, K. Zhuo, <i>Eur. J. Org. Chem.</i> , 2017, 2641-2647.                                                                                                                                                                                                                                                                                                                                                                                                                                                                                                                                                                               |             |          |            |
| <p style="text-align: center;"> <math>\text{1d} + \text{2b} \xrightarrow[\text{GVL, 130}^\circ\text{C, 4h}]{\text{Pd/PiNe (0.1 mol\%), PS-TEA (1.5 eq)}} \text{3db}</math> </p> <p style="text-align: center;"><b>3db</b><br/>MW: 252,31 g/mol</p> |                                                                                                                                                                                                                                                                                                                                                                                                                                                                                                                                                                                                                                                                                                  |             |          |            |
| <b>Method:</b>                                                                                                                                                                                                                                     | <p>Prepared according to general procedure: in a 4 mL screw-capped vial equipped with a magnetic stirrer catalyst <b>Pd/PiNe</b> (9.9 wt%, 1.1 mg, 0.1 mmol%), PS-TEA (469 mg, 1.5 mmol), 4-iodotoluene <b>1d</b> (220 mg, 1 mmol, 99% purity), benzyl acrylate <b>2b</b> (189 <math>\mu\text{L}</math>, 1.2 mmol, 98% purity) and 1.25 mL of GVL were consecutively added and the resulting mixture was left under stirring at 130 <math>^\circ\text{C}</math> for 4 h. After reaction completion the catalyst was removed through filtration and washed with 1 mL of GVL (94% recovered). The product <b>3db</b> was isolated by precipitation work-up as white solid (237 mg, 94% yield).</p> |             |          |            |
| <b>Mol Formula</b>                                                                                                                                                                                                                                 | $\text{C}_{17}\text{H}_{16}\text{O}_2$                                                                                                                                                                                                                                                                                                                                                                                                                                                                                                                                                                                                                                                           | <b>m.p.</b> |          |            |
| <b>Elemental Analysis:</b> Calc.: C: 80.93; H: 6.39; found: C: 80.95; H: 6.38                                                                                                                                                                      |                                                                                                                                                                                                                                                                                                                                                                                                                                                                                                                                                                                                                                                                                                  |             |          |            |
| <b><math>^1\text{H NMR}</math><br/>(400 MHz, <math>\text{CDCl}_3</math>)</b>                                                                                                                                                                       | $\delta$ value:                                                                                                                                                                                                                                                                                                                                                                                                                                                                                                                                                                                                                                                                                  | No. H       | Mult     | J value/Hz |
|                                                                                                                                                                                                                                                    | 7.71                                                                                                                                                                                                                                                                                                                                                                                                                                                                                                                                                                                                                                                                                             | 1           | <i>d</i> | 16         |
|                                                                                                                                                                                                                                                    | 7.43-7.36                                                                                                                                                                                                                                                                                                                                                                                                                                                                                                                                                                                                                                                                                        | 4           | <i>m</i> |            |
|                                                                                                                                                                                                                                                    | 7.35-7.34                                                                                                                                                                                                                                                                                                                                                                                                                                                                                                                                                                                                                                                                                        | 2           | <i>m</i> |            |
|                                                                                                                                                                                                                                                    | 7.19                                                                                                                                                                                                                                                                                                                                                                                                                                                                                                                                                                                                                                                                                             | 2           | <i>d</i> | 8          |
|                                                                                                                                                                                                                                                    | 6.44                                                                                                                                                                                                                                                                                                                                                                                                                                                                                                                                                                                                                                                                                             | 1           | <i>d</i> | 16         |
|                                                                                                                                                                                                                                                    | 5.25                                                                                                                                                                                                                                                                                                                                                                                                                                                                                                                                                                                                                                                                                             | 2           | <i>s</i> |            |
|                                                                                                                                                                                                                                                    | 2.37                                                                                                                                                                                                                                                                                                                                                                                                                                                                                                                                                                                                                                                                                             | 3           | <i>s</i> |            |
| <b><math>^{13}\text{C NMR}</math> (100.6 Hz, <math>\text{CDCl}_3</math>) <math>\delta</math>:</b> 167.2, 145.4, 140.1, 136.3, 131.8, 129.8, 128.7, 128.4, 128.4, 128.3, 116.9, 66.4, 21.6.                                                         |                                                                                                                                                                                                                                                                                                                                                                                                                                                                                                                                                                                                                                                                                                  |             |          |            |
| <b>GC-EIMS (m/z, %):</b> 253 (11), 252 (M+, 55), 234 (11), 207 (54), 206 (62), 192 (11), 145 (65), 118 (20), 117 (27), 116 (15), 115 (52), 91 (100), 89 (13), 65 (27).                                                                             |                                                                                                                                                                                                                                                                                                                                                                                                                                                                                                                                                                                                                                                                                                  |             |          |            |

|                                                                                                                                                                                           |                                                                                                                                                                                                                                                                                                                                                                                                                                                                                                                                                                                                                                                                      |             |            |            |
|-------------------------------------------------------------------------------------------------------------------------------------------------------------------------------------------|----------------------------------------------------------------------------------------------------------------------------------------------------------------------------------------------------------------------------------------------------------------------------------------------------------------------------------------------------------------------------------------------------------------------------------------------------------------------------------------------------------------------------------------------------------------------------------------------------------------------------------------------------------------------|-------------|------------|------------|
| <b>Chem.Name</b>                                                                                                                                                                          | (E)-1,2-diphenylethene ( <b>5a</b> )                                                                                                                                                                                                                                                                                                                                                                                                                                                                                                                                                                                                                                 |             |            |            |
| <b>Lit.Ref</b>                                                                                                                                                                            | F. Valentini, H. Mahmoudi, L. A. Bivona, O. Piermatti, M. Bagherzadeh, L. Fusaro, C. Aprile, A. Marrocchi, L. Vaccaro, <i>ACS Sustainable Chem. Eng.</i> 2019, <b>7</b> , 6939–6946                                                                                                                                                                                                                                                                                                                                                                                                                                                                                  |             |            |            |
| 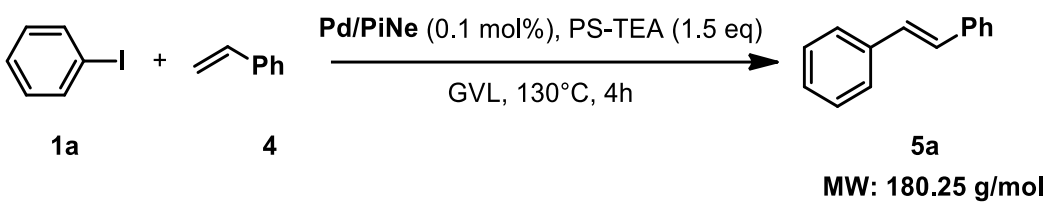 <p style="text-align: center;"><b>5a</b><br/>MW: 180.25 g/mol</p>                                      |                                                                                                                                                                                                                                                                                                                                                                                                                                                                                                                                                                                                                                                                      |             |            |            |
| <b>Method:</b>                                                                                                                                                                            | <p>Prepared according to general procedure: in a 4 mL screw-capped vial equipped with a magnetic stirrer catalyst <b>Pd/PiNe</b> (9.9 wt%, 1.1 mg, 0.1 mmol%), PS-TEA (469 mg, 1.5 mmol), iodobenzene <b>1a</b> (114 <math>\mu</math>L, 1 mmol, 97% purity), styrene <b>4</b> (128 <math>\mu</math>L, 1.2 mmol, 98% purity) and 1.25 mL of GVL were consecutively added and the resulting mixture was left under stirring at 130 °C for 4 h. After reaction completion the catalyst was removed through filtration and washed with 1 mL of GVL (94% recovered). The product <b>3ab</b> was isolated by precipitation work-up as white solid (159 mg, 88% yield).</p> |             |            |            |
| <b>Mol Formula</b>                                                                                                                                                                        | $C_{14}H_{12}$                                                                                                                                                                                                                                                                                                                                                                                                                                                                                                                                                                                                                                                       | <b>m.p.</b> | 126-128 °C |            |
| <b>Elemental Analysis:</b> Calc.: C: 93.29; H: 6.71; found: C: 93.32; H: 6.72.                                                                                                            |                                                                                                                                                                                                                                                                                                                                                                                                                                                                                                                                                                                                                                                                      |             |            |            |
| <b><sup>1</sup>H NMR</b><br>(400 MHz, CDCl <sub>3</sub> )                                                                                                                                 | $\delta$ value:                                                                                                                                                                                                                                                                                                                                                                                                                                                                                                                                                                                                                                                      | No. H       | Mult       | J value/Hz |
|                                                                                                                                                                                           | 7.54                                                                                                                                                                                                                                                                                                                                                                                                                                                                                                                                                                                                                                                                 | 4           | <i>d</i>   | 8.0        |
|                                                                                                                                                                                           | 7.38                                                                                                                                                                                                                                                                                                                                                                                                                                                                                                                                                                                                                                                                 | 4           | <i>t</i>   | 8.0        |
|                                                                                                                                                                                           | 7.30-7.26                                                                                                                                                                                                                                                                                                                                                                                                                                                                                                                                                                                                                                                            | 2           | <i>m</i>   |            |
|                                                                                                                                                                                           | 7.14                                                                                                                                                                                                                                                                                                                                                                                                                                                                                                                                                                                                                                                                 | 2           | <i>s</i>   |            |
| <b><sup>13</sup>C NMR (100.6 Hz, CDCl<sub>3</sub>)</b> $\delta$ : 137.5, 128.8, 127.8, 126.7.                                                                                             |                                                                                                                                                                                                                                                                                                                                                                                                                                                                                                                                                                                                                                                                      |             |            |            |
| <b>GC-EIMS (m/z, %):</b> 181 (40), 180 (M+, 100), 179 (100), 178 (91), 177 (24), 176 (27), 166 (19), 165 (86), 152 (35), 151 (17), 102 (23), 89 (46), 77 (19), 76 (33), 63 (18), 51 (23). |                                                                                                                                                                                                                                                                                                                                                                                                                                                                                                                                                                                                                                                                      |             |            |            |

|                                                                                                                                                                                                                                                                                                                                                                                                                                                                                                                                                                                                                                                                      |                                                                                                             |             |            |            |
|----------------------------------------------------------------------------------------------------------------------------------------------------------------------------------------------------------------------------------------------------------------------------------------------------------------------------------------------------------------------------------------------------------------------------------------------------------------------------------------------------------------------------------------------------------------------------------------------------------------------------------------------------------------------|-------------------------------------------------------------------------------------------------------------|-------------|------------|------------|
| <b>Chem.Name</b>                                                                                                                                                                                                                                                                                                                                                                                                                                                                                                                                                                                                                                                     | (E)-1-nitro-3-styrylbenzene ( <b>5b</b> )                                                                   |             |            |            |
| <b>Lit.Ref</b>                                                                                                                                                                                                                                                                                                                                                                                                                                                                                                                                                                                                                                                       | A. Maji, O. Singh, S. Singh, A. Mohanty, P.K. Maji, K. Ghosh, <i>Eur. J. Inorg. Chem.</i> , 2020, 1596-1611 |             |            |            |
| <p style="text-align: center;"> <chem>O=[N+]([O-])c1cccc(I)c1</chem> + <chem>C=Cc1ccccc1</chem> <math>\xrightarrow[\text{GVL, 130}^\circ\text{C, 4h}]{\text{Pd/PiNe (0.1 mol\%), PS-TEA (1.5 eq)}}</math> <chem>O=[N+]([O-])c1cccc(C=Cc2ccccc2)c1</chem> </p> <p style="text-align: center;"> <b>1b</b>                  <b>4</b>                                                  <b>5b</b><br/> <b>MW: 225,24 g/mol</b> </p>                                                                                                                                                                                                                                       |                                                                                                             |             |            |            |
| <b>Method:</b>                                                                                                                                                                                                                                                                                                                                                                                                                                                                                                                                                                                                                                                       |                                                                                                             |             |            |            |
| <p>Prepared according to general procedure: in a 4 mL screw-capped vial equipped with a magnetic stirrer catalyst <b>Pd/PiNe</b> (9.9 wt%, 1.1 mg, 0.1 mmol%), PS-TEA (469 mg, 1.5 mmol), 1-iodo-3-nitrobenzene <b>1b</b> (251 mg, 1 mmol, 99% purity), styrene <b>4</b> (128 <math>\mu</math>L, 1.2 mmol, 98% purity) and 1.25 mL of GVL were consecutively added and the resulting mixture was left under stirring at 130 °C for 4 h. After reaction completion the catalyst was removed through filtration and washed with 1 mL of GVL (94% recovered). The product <b>5b</b> was isolated by precipitation work-up as pale yellow solid (171 mg, 76% yield).</p> |                                                                                                             |             |            |            |
| <b>Mol Formula</b>                                                                                                                                                                                                                                                                                                                                                                                                                                                                                                                                                                                                                                                   | $C_{14}H_{11}NO_2$                                                                                          | <b>m.p.</b> | 106-107 °C |            |
| <b>Elemental Analysis:</b> Calc.: C, 74.65; H, 4.92; N, 6.22; found: C: 74.67; H: 4.91; N: 6.21                                                                                                                                                                                                                                                                                                                                                                                                                                                                                                                                                                      |                                                                                                             |             |            |            |
| <b><sup>1</sup>H NMR</b><br><b>(400 MHz, CDCl<sub>3</sub>)</b>                                                                                                                                                                                                                                                                                                                                                                                                                                                                                                                                                                                                       | $\delta$ value:                                                                                             | No. H       | Mult       | J value/Hz |
|                                                                                                                                                                                                                                                                                                                                                                                                                                                                                                                                                                                                                                                                      | 8.38                                                                                                        | 1           | s          |            |
|                                                                                                                                                                                                                                                                                                                                                                                                                                                                                                                                                                                                                                                                      | 8.11                                                                                                        | 1           | d          | 7.6        |
|                                                                                                                                                                                                                                                                                                                                                                                                                                                                                                                                                                                                                                                                      | 7.80                                                                                                        | 1           | d          | 7.6        |
|                                                                                                                                                                                                                                                                                                                                                                                                                                                                                                                                                                                                                                                                      | 7.56-7.51                                                                                                   | 3           | m          |            |
|                                                                                                                                                                                                                                                                                                                                                                                                                                                                                                                                                                                                                                                                      | 7.41                                                                                                        | 2           | t          | 7.6        |
|                                                                                                                                                                                                                                                                                                                                                                                                                                                                                                                                                                                                                                                                      | 7.35-7.31                                                                                                   | 1           | m          |            |
|                                                                                                                                                                                                                                                                                                                                                                                                                                                                                                                                                                                                                                                                      | 7.25                                                                                                        | 1           | d          | 16.0       |
|                                                                                                                                                                                                                                                                                                                                                                                                                                                                                                                                                                                                                                                                      | 7.14                                                                                                        | 1           | d          | 16.0       |
| <b><sup>13</sup>C NMR (100.6 Hz, CDCl<sub>3</sub>)</b> $\delta$ : 148.9, 139.3, 136.4, 132.4, 131.9, 129.7, 129.0, 128.7, 127.0, 126.2, 122.2, 121.0.                                                                                                                                                                                                                                                                                                                                                                                                                                                                                                                |                                                                                                             |             |            |            |
| <b>GC-EIMS (m/z, %):</b> 226 (13), 225 (M <sup>+</sup> , 79), 180 (15), 179 (27), 178 (100), 176 (18), 165 (12), 152 (21)                                                                                                                                                                                                                                                                                                                                                                                                                                                                                                                                            |                                                                                                             |             |            |            |

|                                                                                                                                                                                                                                                                                                                                                                                                                                                                                                                                                                                                                                                                   |                                                                                                                                                                                     |             |            |            |
|-------------------------------------------------------------------------------------------------------------------------------------------------------------------------------------------------------------------------------------------------------------------------------------------------------------------------------------------------------------------------------------------------------------------------------------------------------------------------------------------------------------------------------------------------------------------------------------------------------------------------------------------------------------------|-------------------------------------------------------------------------------------------------------------------------------------------------------------------------------------|-------------|------------|------------|
| <b>Chem.Name</b>                                                                                                                                                                                                                                                                                                                                                                                                                                                                                                                                                                                                                                                  | (E)-1-(4-styrylphenyl)ethanone ( <b>5c</b> )                                                                                                                                        |             |            |            |
| <b>Lit.Ref</b>                                                                                                                                                                                                                                                                                                                                                                                                                                                                                                                                                                                                                                                    | F. Valentini, H. Mahmoudi, L. A. Bivona, O. Piermatti, M. Bagherzadeh, L. Fusaro, C. Aprile, A. Marrocchi, L. Vaccaro, <i>ACS Sustainable Chem. Eng.</i> 2019, <b>7</b> , 6939–6946 |             |            |            |
| 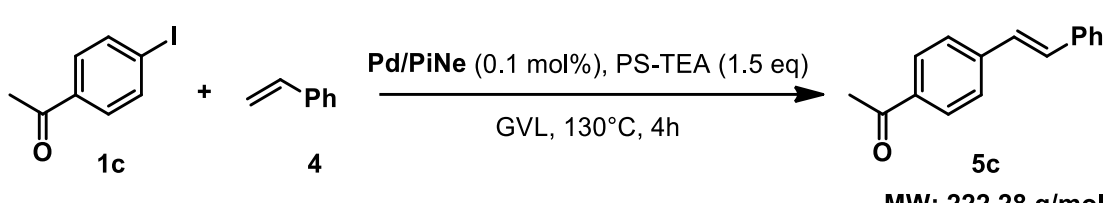 <p style="text-align: center;">MW: 222,28 g/mol</p>                                                                                                                                                                                                                                                                                                                                                                                                                                                                                                                            |                                                                                                                                                                                     |             |            |            |
| <b>Method:</b>                                                                                                                                                                                                                                                                                                                                                                                                                                                                                                                                                                                                                                                    |                                                                                                                                                                                     |             |            |            |
| <p>Prepared according to general procedure: in a 4 mL screw-capped vial equipped with a magnetic stirrer catalyst <b>Pd/PiNe</b> (9.9 wt%, 1.1 mg, 0.1 mmol%), PS-TEA (469 mg, 1.5 mmol), 4-iodoacetophenone <b>1c</b> (249 mg, 1 mmol, 99% purity), styrene <b>4</b> (128 <math>\mu</math>L, 1.2 mmol, 98% purity) and 1.25 mL of GVL were consecutively added and the resulting mixture was left under stirring at 130 °C for 4 h. After reaction completion the catalyst was removed through filtration and washed with 1 mL of GVL (94% recovered). The product <b>5c</b> was isolated by precipitation work-up as pale yellow solid (211 mg, 95% yield).</p> |                                                                                                                                                                                     |             |            |            |
| <b>Mol Formula</b>                                                                                                                                                                                                                                                                                                                                                                                                                                                                                                                                                                                                                                                | C <sub>16</sub> H <sub>14</sub> O                                                                                                                                                   | <b>m.p.</b> | 140-142 °C |            |
| <b>Elemental Analysis:</b> Calc.: C: 86.45; H: 6.35; found: C: 86.42; H: 6.34.                                                                                                                                                                                                                                                                                                                                                                                                                                                                                                                                                                                    |                                                                                                                                                                                     |             |            |            |
| <b><sup>1</sup>H NMR</b><br>(400 MHz, CDCl <sub>3</sub> )                                                                                                                                                                                                                                                                                                                                                                                                                                                                                                                                                                                                         | $\delta$ value:                                                                                                                                                                     | No. H       | Mult       | J value/Hz |
|                                                                                                                                                                                                                                                                                                                                                                                                                                                                                                                                                                                                                                                                   | 7.96                                                                                                                                                                                | 2           | <i>d</i>   | 8.4        |
|                                                                                                                                                                                                                                                                                                                                                                                                                                                                                                                                                                                                                                                                   | 7.59                                                                                                                                                                                | 2           | <i>d</i>   | 8.0        |
|                                                                                                                                                                                                                                                                                                                                                                                                                                                                                                                                                                                                                                                                   | 7.54                                                                                                                                                                                | 2           | <i>d</i>   | 7.6        |
|                                                                                                                                                                                                                                                                                                                                                                                                                                                                                                                                                                                                                                                                   | 7.40-7.37                                                                                                                                                                           | 2           | <i>m</i>   |            |
|                                                                                                                                                                                                                                                                                                                                                                                                                                                                                                                                                                                                                                                                   | 7.30                                                                                                                                                                                | 1           | <i>t</i>   | 8          |
|                                                                                                                                                                                                                                                                                                                                                                                                                                                                                                                                                                                                                                                                   | 7.24                                                                                                                                                                                | 1           | <i>d</i>   | 16         |
|                                                                                                                                                                                                                                                                                                                                                                                                                                                                                                                                                                                                                                                                   | 7.14                                                                                                                                                                                | 1           | <i>d</i>   | 16         |
|                                                                                                                                                                                                                                                                                                                                                                                                                                                                                                                                                                                                                                                                   | 2.61                                                                                                                                                                                | 3           | <i>s</i>   |            |
| <b><sup>13</sup>C NMR (100.6 Hz, CDCl<sub>3</sub>)</b> $\delta$ : 197.6, 142.2, 136.8, 136.1, 131.6, 129.0, 128.9, 128.5, 127.6, 127.0, 126.7, 26.8.                                                                                                                                                                                                                                                                                                                                                                                                                                                                                                              |                                                                                                                                                                                     |             |            |            |
| <b>GC-EIMS (m/z, %):</b> 223 (27), 222 (M <sup>+</sup> , 89), 208 (38), 207 (100), 179 (52), 178 (89), 177 (25), 176 (26), 152 (23), 89 (21).                                                                                                                                                                                                                                                                                                                                                                                                                                                                                                                     |                                                                                                                                                                                     |             |            |            |



|                                                                                                                                                                                                                                                                                                                                                                                                                                                                                                                                                                                                                                                        |                                                                                                                                                                                     |             |            |            |
|--------------------------------------------------------------------------------------------------------------------------------------------------------------------------------------------------------------------------------------------------------------------------------------------------------------------------------------------------------------------------------------------------------------------------------------------------------------------------------------------------------------------------------------------------------------------------------------------------------------------------------------------------------|-------------------------------------------------------------------------------------------------------------------------------------------------------------------------------------|-------------|------------|------------|
| <b>Chem.Name</b>                                                                                                                                                                                                                                                                                                                                                                                                                                                                                                                                                                                                                                       | (E)-1-methyl-4-styrylbenzene ( <b>5d</b> )                                                                                                                                          |             |            |            |
| <b>Lit.Ref</b>                                                                                                                                                                                                                                                                                                                                                                                                                                                                                                                                                                                                                                         | F. Valentini, H. Mahmoudi, L. A. Bivona, O. Piermatti, M. Bagherzadeh, L. Fusaro, C. Aprile, A. Marrocchi, L. Vaccaro, <i>ACS Sustainable Chem. Eng.</i> 2019, <b>7</b> , 6939–6946 |             |            |            |
| 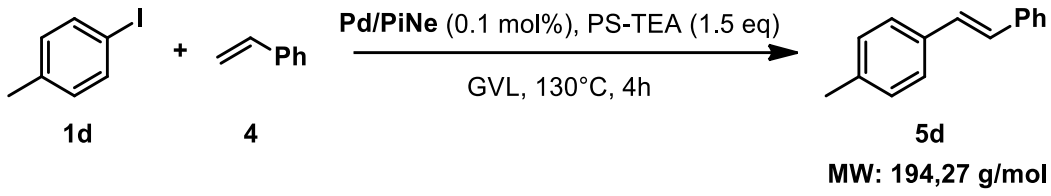 <p style="text-align: center;"><b>5d</b><br/>MW: 194,27 g/mol</p>                                                                                                                                                                                                                                                                                                                                                                                                                                                                                                   |                                                                                                                                                                                     |             |            |            |
| <b>Method:</b>                                                                                                                                                                                                                                                                                                                                                                                                                                                                                                                                                                                                                                         |                                                                                                                                                                                     |             |            |            |
| <p>Prepared according to general procedure: in a 4 mL screw-capped vial equipped with a magnetic stirrer catalyst <b>Pd/PiNe</b> (9.9 wt%, 1.1 mg, 0.1 mmol%), PS-TEA (469 mg, 1.5 mmol), 4-iodotoluene <b>1d</b> (220 mg, 1 mmol, 99% purity), styrene <b>4</b> (128 <math>\mu</math>L, 1.2 mmol, 98% purity) and 1.25 mL of GVL were consecutively added and the resulting mixture was left under stirring at 130 °C for 4 h. After reaction completion the catalyst was removed through filtration and washed with 1 mL of GVL (94% recovered). The product <b>5d</b> was isolated by precipitation work-up as white solid (171 mg, 88% yield).</p> |                                                                                                                                                                                     |             |            |            |
| <b>Mol Formula</b>                                                                                                                                                                                                                                                                                                                                                                                                                                                                                                                                                                                                                                     | C <sub>15</sub> H <sub>14</sub>                                                                                                                                                     | <b>m.p.</b> | 120-122 °C |            |
| <b>Elemental Analysis:</b> Calc.: C: 92.74; H: 7.26; found: C: 92.71; H: 7.24.                                                                                                                                                                                                                                                                                                                                                                                                                                                                                                                                                                         |                                                                                                                                                                                     |             |            |            |
| <b><sup>1</sup>H NMR</b><br>(400 MHz, CDCl <sub>3</sub> )                                                                                                                                                                                                                                                                                                                                                                                                                                                                                                                                                                                              | $\delta$ value:                                                                                                                                                                     | No. H       | Mult       | J value/Hz |
|                                                                                                                                                                                                                                                                                                                                                                                                                                                                                                                                                                                                                                                        | 7.51                                                                                                                                                                                | 2           | <i>d</i>   | 7.6        |
|                                                                                                                                                                                                                                                                                                                                                                                                                                                                                                                                                                                                                                                        | 7.42                                                                                                                                                                                | 2           | <i>d</i>   | 8.0        |
|                                                                                                                                                                                                                                                                                                                                                                                                                                                                                                                                                                                                                                                        | 7.35                                                                                                                                                                                | 2           | <i>t</i>   | 7.6        |
|                                                                                                                                                                                                                                                                                                                                                                                                                                                                                                                                                                                                                                                        | 7.26-7.20                                                                                                                                                                           | 1           | <i>m</i>   |            |
|                                                                                                                                                                                                                                                                                                                                                                                                                                                                                                                                                                                                                                                        | 7.17                                                                                                                                                                                | 2           | <i>d</i>   | 8.0        |
|                                                                                                                                                                                                                                                                                                                                                                                                                                                                                                                                                                                                                                                        | 7.10-7.06                                                                                                                                                                           | 2           | <i>m</i>   |            |
|                                                                                                                                                                                                                                                                                                                                                                                                                                                                                                                                                                                                                                                        | 2.36                                                                                                                                                                                | 3           | <i>s</i>   |            |
| <b><sup>13</sup>C NMR (100.6 Hz, CDCl<sub>3</sub>)</b> $\delta$ : 137.7, 134.7, 129.5, 128.8, 127.9, 127.6, 126.6, 126.5, 21.4.                                                                                                                                                                                                                                                                                                                                                                                                                                                                                                                        |                                                                                                                                                                                     |             |            |            |
| <b>GC-EIMS (m/z, %):</b> 195 (31), 194 (M <sup>+</sup> , 97), 193 (46), 180 (29), 179 (100), 178 (94), 165 (27), 152 (19), 115 (26), 89 (17).                                                                                                                                                                                                                                                                                                                                                                                                                                                                                                          |                                                                                                                                                                                     |             |            |            |

|                                                                                                                                                                                                                                                      |                                                                                                                                                                                                                                                                                                                                                                                                                                                                                                                                                                                                                                                                                                                                                       |             |           |            |
|------------------------------------------------------------------------------------------------------------------------------------------------------------------------------------------------------------------------------------------------------|-------------------------------------------------------------------------------------------------------------------------------------------------------------------------------------------------------------------------------------------------------------------------------------------------------------------------------------------------------------------------------------------------------------------------------------------------------------------------------------------------------------------------------------------------------------------------------------------------------------------------------------------------------------------------------------------------------------------------------------------------------|-------------|-----------|------------|
| <b>Chem.Name</b>                                                                                                                                                                                                                                     | 4-nitro-1,1'-biphenyl ( <b>7ea</b> )                                                                                                                                                                                                                                                                                                                                                                                                                                                                                                                                                                                                                                                                                                                  |             |           |            |
| <b>Lit.Ref</b>                                                                                                                                                                                                                                       | E. Ismalaj, G. Strappaveccia, E. Ballerini, F. Elisei, O. Piermatti, D. Gelman, L. Vaccaro <i>ACS Sustainable Chem. Eng.</i> , <b>2014</b> , 2, 2461-2464                                                                                                                                                                                                                                                                                                                                                                                                                                                                                                                                                                                             |             |           |            |
| <p style="text-align: center;"> <math>\text{1e} + \text{6a} \xrightarrow[\text{GVL:H}_2\text{O (4:1), 130}^\circ\text{C, 20h}]{\text{Pd/PiNe (0.5 mol\%), TBAF (1.5 eq)}} \text{7ea}</math> </p> <p style="text-align: center;">MW: 199,21 g/mol</p> |                                                                                                                                                                                                                                                                                                                                                                                                                                                                                                                                                                                                                                                                                                                                                       |             |           |            |
| <b>Method:</b>                                                                                                                                                                                                                                       | <p>Prepared according to general procedure: in a 4 mL screw-capped vial equipped with a magnetic stirrer, the aryl halide <b>1e</b> (204 mg, 1mmol), triethoxy(phenyl) silane <b>6a</b> (368 mg, 0.370 mL 1.5 mmol), GVL: H<sub>2</sub>O (4:1, 1 mL), TBAF (1.5 equiv, 488 mg) and <b>Pd/PiNe</b> (0.5 mol%, 5.3 mg) were consecutively added, and the resulting mixture was left under stirring at 130 °C. After 20 h, the catalyst was filtered off and washed with 1 mL of GVL. The product was precipitated with 1 mL of water at 0°C. The precipitate was filtered off, washed with 1 mL of cold water, and purified by column chromatography (petroleum ether:EtOAc, 95:5) to afford product <b>7ea</b> as white solid (162 mg, 81% yield).</p> |             |           |            |
| <b>Mol Formula</b>                                                                                                                                                                                                                                   | C <sub>12</sub> H <sub>9</sub> NO <sub>2</sub>                                                                                                                                                                                                                                                                                                                                                                                                                                                                                                                                                                                                                                                                                                        | <b>m.p.</b> | 116-117°C |            |
| <b>Elemental Analysis:</b> Calc.: C: 72.35; H: 4.55; N: 7.03. found: C, 72.40; H: 4.59; N: 7.01                                                                                                                                                      |                                                                                                                                                                                                                                                                                                                                                                                                                                                                                                                                                                                                                                                                                                                                                       |             |           |            |
| <b><sup>1</sup>H NMR</b><br>(400 MHz, CDCl <sub>3</sub> )                                                                                                                                                                                            | δ value:                                                                                                                                                                                                                                                                                                                                                                                                                                                                                                                                                                                                                                                                                                                                              | No. H       | Mult      | J value/Hz |
|                                                                                                                                                                                                                                                      | 8.30                                                                                                                                                                                                                                                                                                                                                                                                                                                                                                                                                                                                                                                                                                                                                  | 2           | <i>d</i>  | 8.0        |
|                                                                                                                                                                                                                                                      | 7.74                                                                                                                                                                                                                                                                                                                                                                                                                                                                                                                                                                                                                                                                                                                                                  | 2           | <i>d</i>  | 8.0        |
|                                                                                                                                                                                                                                                      | 7.63                                                                                                                                                                                                                                                                                                                                                                                                                                                                                                                                                                                                                                                                                                                                                  | 2           | <i>d</i>  | 8.0        |
|                                                                                                                                                                                                                                                      | 7.52-7.43                                                                                                                                                                                                                                                                                                                                                                                                                                                                                                                                                                                                                                                                                                                                             | 3           | <i>m</i>  |            |
| <b><sup>13</sup>C NMR (100.6 Hz, CDCl<sub>3</sub>)</b> δ: 147.8, 147.2, 138.9, 129.2, 129.0, 127.9, 127.5, 124.2.                                                                                                                                    |                                                                                                                                                                                                                                                                                                                                                                                                                                                                                                                                                                                                                                                                                                                                                       |             |           |            |
| <b>GC-EIMS (m/z, %):</b> 199 (M <sup>+</sup> , 83), 169 (44), 153 (31), 152 (100), 151 (33), 150 (11), 141 (40), 127 (11), 126 (11), 115 (19), 77 (12), 76 (14), 63 (13), 51 (12)                                                                    |                                                                                                                                                                                                                                                                                                                                                                                                                                                                                                                                                                                                                                                                                                                                                       |             |           |            |

|                                                                                                                               |                                                                                                                                                                                                                                                                                                                                                                                                                                                                                                                                                                                                                                                                                                                                                       |             |            |            |
|-------------------------------------------------------------------------------------------------------------------------------|-------------------------------------------------------------------------------------------------------------------------------------------------------------------------------------------------------------------------------------------------------------------------------------------------------------------------------------------------------------------------------------------------------------------------------------------------------------------------------------------------------------------------------------------------------------------------------------------------------------------------------------------------------------------------------------------------------------------------------------------------------|-------------|------------|------------|
| <b>Chem.Name</b>                                                                                                              | 1-([1,1'-biphenyl]-4-yl)ethanone ( <b>7fa</b> )                                                                                                                                                                                                                                                                                                                                                                                                                                                                                                                                                                                                                                                                                                       |             |            |            |
| <b>Lit.Ref</b>                                                                                                                | E. Ismalaj, G. Strappaveccia, E. Ballerini, F. Elisei, O. Piematti, D. Gelman, L. Vaccaro <i>ACS Sustainable Chem. Eng.</i> , <b>2014</b> , 2, 2461-2464                                                                                                                                                                                                                                                                                                                                                                                                                                                                                                                                                                                              |             |            |            |
| <p style="text-align: center;"><b>7fa</b><br/>MW: 196,24 g/mol</p>                                                            |                                                                                                                                                                                                                                                                                                                                                                                                                                                                                                                                                                                                                                                                                                                                                       |             |            |            |
| <b>Method:</b>                                                                                                                | <p>Prepared according to general procedure: in a 4 mL screw-capped vial equipped with a magnetic stirrer, the aryl halide <b>1f</b> (203 mg, 1mmol), triethoxy(phenyl) silane <b>6a</b> (368 mg, 0.370 mL 1.5 mmol), GVL: H<sub>2</sub>O (4:1, 1 mL), TBAF (1.5 equiv, 488 mg) and <b>Pd/PiNe</b> (0.5 mol%, 5.3 mg) were consecutively added, and the resulting mixture was left under stirring at 130 °C. After 20 h, the catalyst was filtered off and washed with 1 mL of GVL. The product was precipitated with 1 mL of water at 0°C. The precipitate was filtered off, washed with 1 mL of cold water, and purified by column chromatography (petroleum ether:EtOAc, 95:5) to afford product <b>7fa</b> as white solid (164 mg, 84% yield).</p> |             |            |            |
| <b>Mol Formula</b>                                                                                                            | C <sub>14</sub> H <sub>12</sub> O                                                                                                                                                                                                                                                                                                                                                                                                                                                                                                                                                                                                                                                                                                                     | <b>m.p.</b> | 115-117 °C |            |
| <b>Elemental Analysis:</b> Calc.: C: 85.68; H: 6.16. found: C: 85.78; H: 6.13                                                 |                                                                                                                                                                                                                                                                                                                                                                                                                                                                                                                                                                                                                                                                                                                                                       |             |            |            |
| <b><sup>1</sup>H NMR</b><br>(400 MHz, CDCl <sub>3</sub> )                                                                     | δ value:                                                                                                                                                                                                                                                                                                                                                                                                                                                                                                                                                                                                                                                                                                                                              | No. H       | Mult       | J value/Hz |
|                                                                                                                               | 8.04                                                                                                                                                                                                                                                                                                                                                                                                                                                                                                                                                                                                                                                                                                                                                  | 2           | d          | 8.0        |
|                                                                                                                               | 7.69                                                                                                                                                                                                                                                                                                                                                                                                                                                                                                                                                                                                                                                                                                                                                  | 2           | d          | 8.0        |
|                                                                                                                               | 7.65-7.62                                                                                                                                                                                                                                                                                                                                                                                                                                                                                                                                                                                                                                                                                                                                             | 2           | m          |            |
|                                                                                                                               | 7.48                                                                                                                                                                                                                                                                                                                                                                                                                                                                                                                                                                                                                                                                                                                                                  | 2           | t          | 8.0        |
|                                                                                                                               | 7.42-7.38                                                                                                                                                                                                                                                                                                                                                                                                                                                                                                                                                                                                                                                                                                                                             | 1           | m          |            |
|                                                                                                                               | 2.64                                                                                                                                                                                                                                                                                                                                                                                                                                                                                                                                                                                                                                                                                                                                                  | 3           | s          |            |
| <b><sup>13</sup>C NMR (100.6 Hz, CDCl<sub>3</sub>)</b> δ: 197.9, 145.9, 140.0, 136.0, 129.1, 129.0, 128.4, 127.4, 127.3, 26.8 |                                                                                                                                                                                                                                                                                                                                                                                                                                                                                                                                                                                                                                                                                                                                                       |             |            |            |
| <b>GC-EIMS (m/z, %):</b> 196 (M <sup>+</sup> , 48), 182 (14), 181 (100), 153 (42), 152 (69), 151 (21), 76 (11), 43 (12)       |                                                                                                                                                                                                                                                                                                                                                                                                                                                                                                                                                                                                                                                                                                                                                       |             |            |            |

|                                                                                                                                                                                                                                                                                                                                                                                                                                                                                                                                                                                                                                                                                                                                                                       |                                                                                                                |             |          |            |
|-----------------------------------------------------------------------------------------------------------------------------------------------------------------------------------------------------------------------------------------------------------------------------------------------------------------------------------------------------------------------------------------------------------------------------------------------------------------------------------------------------------------------------------------------------------------------------------------------------------------------------------------------------------------------------------------------------------------------------------------------------------------------|----------------------------------------------------------------------------------------------------------------|-------------|----------|------------|
| <b>Chem.Name</b>                                                                                                                                                                                                                                                                                                                                                                                                                                                                                                                                                                                                                                                                                                                                                      | ethyl [1,1'-biphenyl]-4-carboxylate ( <b>7ga</b> )                                                             |             |          |            |
| <b>Lit.Ref</b>                                                                                                                                                                                                                                                                                                                                                                                                                                                                                                                                                                                                                                                                                                                                                        | Q. Cao, J. L. Howard, E. Wheatley, D. L. Browne, <i>Angew. Chem. Int. Ed.</i> , 2018, <b>57</b> , 11339 -11343 |             |          |            |
| <p style="text-align: right;"><b>MW: 226,27 g/mol</b></p>                                                                                                                                                                                                                                                                                                                                                                                                                                                                                                                                                                                                                                                                                                             |                                                                                                                |             |          |            |
| <b>Method:</b>                                                                                                                                                                                                                                                                                                                                                                                                                                                                                                                                                                                                                                                                                                                                                        |                                                                                                                |             |          |            |
| <p>Prepared according to general procedure: in a 4 mL screw-capped vial equipped with a magnetic stirrer, the aryl halide <b>1g</b> (234 mg, 0.167 mL, 1mmol), triethoxy(phenyl) silane <b>6a</b> (368 mg, 0.370 mL 1.5 mmol), GVL: H<sub>2</sub>O (4:1, 1 mL), TBAF (1.5 equiv, 488 mg) and <b>Pd/PiNe</b> (0.5 mol%, 5.3 mg) were consecutively added, and the resulting mixture was left under stirring at 130 °C. After 20 h, the catalyst was filtered off and washed with 1 mL of GVL. The product was precipitated with 1 mL of water at 0°C. The precipitate was filtered off, washed with 1 mL of cold water, and purified by column chromatography (petroleum ether:EtOAc, 95:5) to afford product <b>7ga</b> as pale yellow solid (188 mg, 83% yield).</p> |                                                                                                                |             |          |            |
| <b>Mol Formula</b>                                                                                                                                                                                                                                                                                                                                                                                                                                                                                                                                                                                                                                                                                                                                                    | C <sub>15</sub> H <sub>14</sub> O <sub>2</sub>                                                                 | <b>m.p.</b> | 93-94°C  |            |
| <b>Elemental Analysis:</b> C: 79.62; H: 6.24; found: C: 79.66; H: 6.20                                                                                                                                                                                                                                                                                                                                                                                                                                                                                                                                                                                                                                                                                                |                                                                                                                |             |          |            |
| <b><sup>1</sup>H NMR</b><br>(400 MHz, CDCl <sub>3</sub> )                                                                                                                                                                                                                                                                                                                                                                                                                                                                                                                                                                                                                                                                                                             | δ value:                                                                                                       | No. H       | Mult     | J value/Hz |
|                                                                                                                                                                                                                                                                                                                                                                                                                                                                                                                                                                                                                                                                                                                                                                       | 8.12                                                                                                           | 2           | <i>d</i> | 8.0        |
|                                                                                                                                                                                                                                                                                                                                                                                                                                                                                                                                                                                                                                                                                                                                                                       | 7.66                                                                                                           | 2           | <i>d</i> | 8.0        |
|                                                                                                                                                                                                                                                                                                                                                                                                                                                                                                                                                                                                                                                                                                                                                                       | 7.63                                                                                                           | 2           | <i>d</i> | 8.0        |
|                                                                                                                                                                                                                                                                                                                                                                                                                                                                                                                                                                                                                                                                                                                                                                       | 7.47                                                                                                           | 2           | <i>t</i> | 8.0        |
|                                                                                                                                                                                                                                                                                                                                                                                                                                                                                                                                                                                                                                                                                                                                                                       | 7.41-7.38                                                                                                      | 1           | <i>m</i> |            |
|                                                                                                                                                                                                                                                                                                                                                                                                                                                                                                                                                                                                                                                                                                                                                                       | 4.41                                                                                                           | 2           | <i>q</i> | 8.0        |
|                                                                                                                                                                                                                                                                                                                                                                                                                                                                                                                                                                                                                                                                                                                                                                       | 1.42                                                                                                           | 3           | <i>t</i> | 8.0        |
| <b><sup>13</sup>C NMR (100.6 Hz, CDCl<sub>3</sub>)</b> δ: 166.7, 145.7, 140.2, 130.2, 129.4, 129.1, 128.2, 127.4, 127.1, 61.1, 14.5                                                                                                                                                                                                                                                                                                                                                                                                                                                                                                                                                                                                                                   |                                                                                                                |             |          |            |
| <b>GC-EIMS (m/z, %):</b> 226 (M+, 65), 198 (34), 182 (18), 181 (100), 153 (30), 152 (51), 76 (12)                                                                                                                                                                                                                                                                                                                                                                                                                                                                                                                                                                                                                                                                     |                                                                                                                |             |          |            |

|                                                                                                                                                                                                                                                                                                                                                                                                                                                                                                                                                                                                                                                                                                                                                       |                                                                                                                                                          |             |          |            |
|-------------------------------------------------------------------------------------------------------------------------------------------------------------------------------------------------------------------------------------------------------------------------------------------------------------------------------------------------------------------------------------------------------------------------------------------------------------------------------------------------------------------------------------------------------------------------------------------------------------------------------------------------------------------------------------------------------------------------------------------------------|----------------------------------------------------------------------------------------------------------------------------------------------------------|-------------|----------|------------|
| <b>Chem.Name</b>                                                                                                                                                                                                                                                                                                                                                                                                                                                                                                                                                                                                                                                                                                                                      | 4-methyl-1,1'-biphenyl ( <b>7da</b> )                                                                                                                    |             |          |            |
| <b>Lit.Ref</b>                                                                                                                                                                                                                                                                                                                                                                                                                                                                                                                                                                                                                                                                                                                                        | E. Ismalaj, G. Strappaveccia, E. Ballerini, F. Elisei, O. Piematti, D. Gelman, L. Vaccaro <i>ACS Sustainable Chem. Eng.</i> , <b>2014</b> , 2, 2461-2464 |             |          |            |
| <p style="text-align: center;"><b>7da</b><br/>MW: 168,23 g/mol</p>                                                                                                                                                                                                                                                                                                                                                                                                                                                                                                                                                                                                                                                                                    |                                                                                                                                                          |             |          |            |
| <b>Method:</b>                                                                                                                                                                                                                                                                                                                                                                                                                                                                                                                                                                                                                                                                                                                                        |                                                                                                                                                          |             |          |            |
| <p>Prepared according to general procedure: in a 4 mL screw-capped vial equipped with a magnetic stirrer, the aryl halide <b>1d</b> (220 mg, 1mmol), triethoxy(phenyl) silane <b>6a</b> (368 mg, 0.370 mL 1.5 mmol), GVL: H<sub>2</sub>O (4:1, 1 mL), TBAF (1.5 equiv, 488 mg) and <b>Pd/PiNe</b> (0.5 mol%, 5.3 mg) were consecutively added, and the resulting mixture was left under stirring at 130 °C. After 20 h, the catalyst was filtered off and washed with 1 mL of GVL. The product was precipitated with 1 mL of water at 0°C. The precipitate was filtered off, washed with 1 mL of cold water, and purified by column chromatography (petroleum ether:EtOAc, 95:5) to afford product <b>7da</b> as white solid (130 mg, 77% yield).</p> |                                                                                                                                                          |             |          |            |
| <b>Mol Formula</b>                                                                                                                                                                                                                                                                                                                                                                                                                                                                                                                                                                                                                                                                                                                                    | C <sub>13</sub> H <sub>12</sub>                                                                                                                          | <b>m.p.</b> | 45-47 °C |            |
| <b>Elemental Analysis:</b> Calc.: C: 92.81; H: 7.19. found: C, 92.76; H: 7.23                                                                                                                                                                                                                                                                                                                                                                                                                                                                                                                                                                                                                                                                         |                                                                                                                                                          |             |          |            |
| <b><sup>1</sup>H NMR</b><br>(400 MHz, CDCl <sub>3</sub> )                                                                                                                                                                                                                                                                                                                                                                                                                                                                                                                                                                                                                                                                                             | δ value:                                                                                                                                                 | No. H       | Mult     | J value/Hz |
|                                                                                                                                                                                                                                                                                                                                                                                                                                                                                                                                                                                                                                                                                                                                                       | 7.61                                                                                                                                                     | 2           | <i>d</i> | 8.0        |
|                                                                                                                                                                                                                                                                                                                                                                                                                                                                                                                                                                                                                                                                                                                                                       | 7.52                                                                                                                                                     | 2           | <i>d</i> | 8.0        |
|                                                                                                                                                                                                                                                                                                                                                                                                                                                                                                                                                                                                                                                                                                                                                       | 7.45                                                                                                                                                     | 2           | <i>t</i> | 8.0        |
|                                                                                                                                                                                                                                                                                                                                                                                                                                                                                                                                                                                                                                                                                                                                                       | 7.35                                                                                                                                                     | 1           | <i>t</i> | 8.0        |
|                                                                                                                                                                                                                                                                                                                                                                                                                                                                                                                                                                                                                                                                                                                                                       | 7.29-7.27                                                                                                                                                | 2           | <i>m</i> |            |
|                                                                                                                                                                                                                                                                                                                                                                                                                                                                                                                                                                                                                                                                                                                                                       | 2.43                                                                                                                                                     | 3           | <i>s</i> |            |
| <b><sup>13</sup>C NMR (100.6 Hz, CDCl<sub>3</sub>)</b> δ: 141.3, 138.5, 137.1, 129.6, 128.9, 127.1, 127.1, 127.1, 21.2                                                                                                                                                                                                                                                                                                                                                                                                                                                                                                                                                                                                                                |                                                                                                                                                          |             |          |            |
| <b>GC-EIMS (m/z, %):</b> 169 (14), 168 (M <sup>+</sup> , 100), 167 (66), 165 (28), 153 (15), 152 (21), 115 (11)                                                                                                                                                                                                                                                                                                                                                                                                                                                                                                                                                                                                                                       |                                                                                                                                                          |             |          |            |

|                                                                                                                                                                                                                                                                                                                                                                                                                                                                                                                                                                                                                                                                                                                                            |                                                                                                                                                           |             |          |            |
|--------------------------------------------------------------------------------------------------------------------------------------------------------------------------------------------------------------------------------------------------------------------------------------------------------------------------------------------------------------------------------------------------------------------------------------------------------------------------------------------------------------------------------------------------------------------------------------------------------------------------------------------------------------------------------------------------------------------------------------------|-----------------------------------------------------------------------------------------------------------------------------------------------------------|-------------|----------|------------|
| <b>Chem.Name</b>                                                                                                                                                                                                                                                                                                                                                                                                                                                                                                                                                                                                                                                                                                                           | 4-methoxy-1,1'-biphenyl ( <b>7ha</b> )                                                                                                                    |             |          |            |
| <b>Lit.Ref</b>                                                                                                                                                                                                                                                                                                                                                                                                                                                                                                                                                                                                                                                                                                                             | E. Ismalaj, G. Strappaveccia, E. Ballerini, F. Elisei, O. Piermatti, D. Gelman, L. Vaccaro <i>ACS Sustainable Chem. Eng.</i> , <b>2014</b> , 2, 2461-2464 |             |          |            |
| <p style="text-align: center;"> <chem>COc1ccc(I)cc1</chem> (<b>1h</b>) + <chem>COCCOC(c1ccccc1)OCC</chem> (<b>6a</b>) <math>\xrightarrow[\text{GVL:H}_2\text{O (4:1), 130}^\circ\text{C, 20h}]{\text{Pd/PiNe (0.5 mol\%), TBAF (1.5 eq)}}</math> <chem>COc1ccc(cc1)-c2ccccc2</chem> (<b>7ha</b>)<br/> <b>MW: 184,23 g/mol</b> </p>                                                                                                                                                                                                                                                                                                                                                                                                         |                                                                                                                                                           |             |          |            |
| <b>Method:</b>                                                                                                                                                                                                                                                                                                                                                                                                                                                                                                                                                                                                                                                                                                                             |                                                                                                                                                           |             |          |            |
| <p>Prepared according to general procedure: in a 4 mL screw-capped vial equipped with a magnetic stirrer, the aryl halide <b>1h</b> (234 mg, 1mmol), triethoxy(phenyl) silane <b>6a</b> (368 mg, 0.370 mL 1.5 mmol), GVL: H<sub>2</sub>O (4:1, 1 mL), TBAF (1.5 equiv, 488 mg) and <b>Pd/PiNe</b> (0.5 mol%, 5.3 mg) were consecutively added, and the resulting mixture was left under stirring at 130 °C. After 20 h, the catalyst was filtered off and washed with 1 mL of GVL. The product was precipitated with 1 mL of water at 0°C. The precipitate was filtered off, washed with 1 mL of cold water, and purified by column chromatography (petroleum ether) to afford product <b>7ha</b> as yellow solid (118 mg, 64% yield).</p> |                                                                                                                                                           |             |          |            |
| <b>Mol Formula</b>                                                                                                                                                                                                                                                                                                                                                                                                                                                                                                                                                                                                                                                                                                                         | C <sub>13</sub> H <sub>12</sub> O                                                                                                                         | <b>m.p.</b> | 87-89 °C |            |
| <b>Elemental Analysis:</b> Calc.: C: 84.75; H: 6.57. found: C: 84.77; H: 6.55                                                                                                                                                                                                                                                                                                                                                                                                                                                                                                                                                                                                                                                              |                                                                                                                                                           |             |          |            |
| <b><sup>1</sup>H NMR</b><br>(400 MHz, CDCl <sub>3</sub> )                                                                                                                                                                                                                                                                                                                                                                                                                                                                                                                                                                                                                                                                                  | δ value:                                                                                                                                                  | No. H       | Mult     | J value/Hz |
|                                                                                                                                                                                                                                                                                                                                                                                                                                                                                                                                                                                                                                                                                                                                            | 7.55                                                                                                                                                      | 4           | <i>t</i> | 8.0        |
|                                                                                                                                                                                                                                                                                                                                                                                                                                                                                                                                                                                                                                                                                                                                            | 7.42                                                                                                                                                      | 2           | <i>t</i> | 8.0        |
|                                                                                                                                                                                                                                                                                                                                                                                                                                                                                                                                                                                                                                                                                                                                            | 7.33-7.26                                                                                                                                                 | 1           | <i>m</i> |            |
|                                                                                                                                                                                                                                                                                                                                                                                                                                                                                                                                                                                                                                                                                                                                            | 6.99                                                                                                                                                      | 2           | <i>d</i> | 8.0        |
|                                                                                                                                                                                                                                                                                                                                                                                                                                                                                                                                                                                                                                                                                                                                            | 3.86                                                                                                                                                      | 3           | <i>s</i> |            |
| <b><sup>13</sup>C NMR (100.6 Hz, CDCl<sub>3</sub>)</b> δ: 159.3, 141.0, 133.9, 128.9, 128.3, 126.9, 126.8, 114.3, 55.5                                                                                                                                                                                                                                                                                                                                                                                                                                                                                                                                                                                                                     |                                                                                                                                                           |             |          |            |
| <b>GC-EIMS (m/z, %):</b> 185 (14), 184 (M <sup>+</sup> , 100), 169 (51), 141 (61), 139 (17), 115 (53)                                                                                                                                                                                                                                                                                                                                                                                                                                                                                                                                                                                                                                      |                                                                                                                                                           |             |          |            |

|                                                                                                                                                                                                                                                                                                                                                                                                                                                                                                                                                                                                                                                                                                                                              |                                                                                                                                                          |             |          |            |
|----------------------------------------------------------------------------------------------------------------------------------------------------------------------------------------------------------------------------------------------------------------------------------------------------------------------------------------------------------------------------------------------------------------------------------------------------------------------------------------------------------------------------------------------------------------------------------------------------------------------------------------------------------------------------------------------------------------------------------------------|----------------------------------------------------------------------------------------------------------------------------------------------------------|-------------|----------|------------|
| <b>Chem.Name</b>                                                                                                                                                                                                                                                                                                                                                                                                                                                                                                                                                                                                                                                                                                                             | 1-phenylnaphthalene ( <b>7ia</b> )                                                                                                                       |             |          |            |
| <b>Lit.Ref</b>                                                                                                                                                                                                                                                                                                                                                                                                                                                                                                                                                                                                                                                                                                                               | E. Ismalaj, G. Strappaveccia, E. Ballerini, F. Elisei, O. Piematti, D. Gelman, L. Vaccaro <i>ACS Sustainable Chem. Eng.</i> , <b>2014</b> , 2, 2461-2464 |             |          |            |
| <p style="text-align: center;"><b>MW: 204,27 g/mol</b></p>                                                                                                                                                                                                                                                                                                                                                                                                                                                                                                                                                                                                                                                                                   |                                                                                                                                                          |             |          |            |
| <b>Method:</b>                                                                                                                                                                                                                                                                                                                                                                                                                                                                                                                                                                                                                                                                                                                               |                                                                                                                                                          |             |          |            |
| <p>Prepared according to general procedure: in a 4 mL screw-capped vial equipped with a magnetic stirrer, the aryl halide <b>1i</b> (254 mg, 1mmol), triethoxy(phenyl) silane <b>6a</b> (368 mg, 0.370 mL 1.5 mmol), GVL: H<sub>2</sub>O (4:1, 1 mL), TBAF (1.5 equiv, 488 mg) and <b>Pd/PiNe</b> (0.5 mol%, 5.3 mg) were consecutively added, and the resulting mixture was left under stirring at 130 °C. After 20 h, the catalyst was filtered off and washed with 1 mL of GVL. The product was precipitated with 1 mL of water at 0°C. The precipitate was filtered off, washed with 1 mL of cold water, and purified by column chromatography (petroleum ether) to afford product <b>7ia</b> as colourless oil (153 mg, 75% yield).</p> |                                                                                                                                                          |             |          |            |
| <b>Mol Formula</b>                                                                                                                                                                                                                                                                                                                                                                                                                                                                                                                                                                                                                                                                                                                           | C <sub>16</sub> H <sub>12</sub>                                                                                                                          | <b>m.p.</b> | 44-46 °C |            |
| <b>Elemental Analysis:</b> Calc.: C: 94.08; H: 5.92. found: C: 94.16; H: 5.89                                                                                                                                                                                                                                                                                                                                                                                                                                                                                                                                                                                                                                                                |                                                                                                                                                          |             |          |            |
| <b><sup>1</sup>H NMR</b><br>(400 MHz, CDCl <sub>3</sub> )                                                                                                                                                                                                                                                                                                                                                                                                                                                                                                                                                                                                                                                                                    | δ value:                                                                                                                                                 | No. H       | Mult     | J value/Hz |
|                                                                                                                                                                                                                                                                                                                                                                                                                                                                                                                                                                                                                                                                                                                                              | 7.91                                                                                                                                                     | 2           | <i>d</i> | 8          |
|                                                                                                                                                                                                                                                                                                                                                                                                                                                                                                                                                                                                                                                                                                                                              | 7.87                                                                                                                                                     | 1           | <i>d</i> | 8          |
|                                                                                                                                                                                                                                                                                                                                                                                                                                                                                                                                                                                                                                                                                                                                              | 7.55-7.48                                                                                                                                                | 6           | <i>m</i> |            |
|                                                                                                                                                                                                                                                                                                                                                                                                                                                                                                                                                                                                                                                                                                                                              | 7.46-7.41                                                                                                                                                | 3           | <i>m</i> |            |
| <b><sup>13</sup>C NMR (100.6 Hz, CDCl<sub>3</sub>)</b> δ: 140.9, 140.4, 133.9, 131.8, 130.2, 128.4, 127.8, 127.4, 127.1, 126.2, 126.1, 125.9, 125.5.                                                                                                                                                                                                                                                                                                                                                                                                                                                                                                                                                                                         |                                                                                                                                                          |             |          |            |
| <b>GC-EIMS (m/z, %):</b> 204 (M <sup>+</sup> , 100), 203 (98), 202 (61), 201 (13), 200 (13), 101 (16)                                                                                                                                                                                                                                                                                                                                                                                                                                                                                                                                                                                                                                        |                                                                                                                                                          |             |          |            |

|                                                                                                                                                                                                                                                                                                                                                                                                                                                                                                                                                                                                                                                                                                                                                                       |                                                                                                                                                          |             |            |            |
|-----------------------------------------------------------------------------------------------------------------------------------------------------------------------------------------------------------------------------------------------------------------------------------------------------------------------------------------------------------------------------------------------------------------------------------------------------------------------------------------------------------------------------------------------------------------------------------------------------------------------------------------------------------------------------------------------------------------------------------------------------------------------|----------------------------------------------------------------------------------------------------------------------------------------------------------|-------------|------------|------------|
| <b>Chem.Name</b>                                                                                                                                                                                                                                                                                                                                                                                                                                                                                                                                                                                                                                                                                                                                                      | 4-methoxy-4'-nitro-1,1'-biphenyl ( <b>7eb</b> )                                                                                                          |             |            |            |
| <b>Lit.Ref</b>                                                                                                                                                                                                                                                                                                                                                                                                                                                                                                                                                                                                                                                                                                                                                        | E. Ismalaj, G. Strappaveccia, E. Ballerini, F. Elisei, O. Piematti, D. Gelman, L. Vaccaro <i>ACS Sustainable Chem. Eng.</i> , <b>2014</b> , 2, 2461-2464 |             |            |            |
| <p style="text-align: center;"><b>MW: 229,23 g/mol</b></p>                                                                                                                                                                                                                                                                                                                                                                                                                                                                                                                                                                                                                                                                                                            |                                                                                                                                                          |             |            |            |
| <b>Method:</b>                                                                                                                                                                                                                                                                                                                                                                                                                                                                                                                                                                                                                                                                                                                                                        |                                                                                                                                                          |             |            |            |
| <p>Prepared according to general procedure: in a 4 mL screw-capped vial equipped with a magnetic stirrer, the aryl halide <b>1e</b> (204 mg, 1mmol), triethoxy(4-methoxyphenyl) silane <b>6b</b> (418 mg, 0.406 mL, 1.5 mmol), GVL: H<sub>2</sub>O (4:1, 1 mL), TBAF (1.5 equiv, 488 mg) and <b>Pd/PiNe</b> (0.5 mol%, 5.3 mg) were consecutively added, and the resulting mixture was left under stirring at 130 °C. After 20 h, the catalyst was filtered off and washed with 1 mL of GVL. The product was precipitated with 1 mL of water at 0°C. The precipitate was filtered off, washed with 1 mL of cold water, and purified by column chromatography (petroleum ether:EtOAc, 95:5) to afford product <b>7eb</b> as pale yellow solid (209 mg, 91% yield).</p> |                                                                                                                                                          |             |            |            |
| <b>Mol Formula</b>                                                                                                                                                                                                                                                                                                                                                                                                                                                                                                                                                                                                                                                                                                                                                    | C <sub>13</sub> H <sub>11</sub> NO <sub>3</sub>                                                                                                          | <b>m.p.</b> | 110-112 °C |            |
| <b>Elemental Analysis:</b> Calc.: C: 68.11; H: 4.84; N: 6.11. found: C: 68.21; H: 4.90; N: 6.05                                                                                                                                                                                                                                                                                                                                                                                                                                                                                                                                                                                                                                                                       |                                                                                                                                                          |             |            |            |
| <b><sup>1</sup>H NMR</b><br>(400 MHz, CDCl <sub>3</sub> )                                                                                                                                                                                                                                                                                                                                                                                                                                                                                                                                                                                                                                                                                                             | δ value:                                                                                                                                                 | No. H       | Mult       | J value/Hz |
|                                                                                                                                                                                                                                                                                                                                                                                                                                                                                                                                                                                                                                                                                                                                                                       | 8.27                                                                                                                                                     | 2           | <i>d</i>   | 8.0        |
|                                                                                                                                                                                                                                                                                                                                                                                                                                                                                                                                                                                                                                                                                                                                                                       | 7.69                                                                                                                                                     | 2           | <i>d</i>   | 8.0        |
|                                                                                                                                                                                                                                                                                                                                                                                                                                                                                                                                                                                                                                                                                                                                                                       | 7.58                                                                                                                                                     | 2           | <i>d</i>   | 8.0        |
|                                                                                                                                                                                                                                                                                                                                                                                                                                                                                                                                                                                                                                                                                                                                                                       | 7.02                                                                                                                                                     | 2           | <i>d</i>   | 8.0        |
|                                                                                                                                                                                                                                                                                                                                                                                                                                                                                                                                                                                                                                                                                                                                                                       | 3.88                                                                                                                                                     | 3           | <i>s</i>   |            |
| <b><sup>13</sup>C NMR (100.6 Hz, CDCl<sub>3</sub>)</b> δ: 160.6, 147.4, 146.7, 131.2, 128.7, 127.2, 124.3, 114.8, 55.6                                                                                                                                                                                                                                                                                                                                                                                                                                                                                                                                                                                                                                                |                                                                                                                                                          |             |            |            |
| <b>GC-EIMS (m/z, %):</b> 230 (14), 229 (M <sup>+</sup> , 100), 199 (25), 183 (11), 171 (18), 168 (24), 152 (18), 140 (31), 139 (57), 128 (13)                                                                                                                                                                                                                                                                                                                                                                                                                                                                                                                                                                                                                         |                                                                                                                                                          |             |            |            |



|                                                                                                                                                       |                                                                                                                                                                                                                                                                                                                                                                                                                                                                                                                                                                                                                                                                                                                                                   |             |            |            |
|-------------------------------------------------------------------------------------------------------------------------------------------------------|---------------------------------------------------------------------------------------------------------------------------------------------------------------------------------------------------------------------------------------------------------------------------------------------------------------------------------------------------------------------------------------------------------------------------------------------------------------------------------------------------------------------------------------------------------------------------------------------------------------------------------------------------------------------------------------------------------------------------------------------------|-------------|------------|------------|
| <b>Chem.Name</b>                                                                                                                                      | 1-(4'-methoxy-[1,1'-biphenyl]-4-yl)ethanone ( <b>7fb</b> )                                                                                                                                                                                                                                                                                                                                                                                                                                                                                                                                                                                                                                                                                        |             |            |            |
| <b>Lit.Ref</b>                                                                                                                                        | E. Ismalaj, G. Strappaveccia, E. Ballerini, F. Elisei, O. Piermatti, D. Gelman, L. Vaccaro <i>ACS Sustainable Chem. Eng.</i> , <b>2014</b> , 2, 2461-2464                                                                                                                                                                                                                                                                                                                                                                                                                                                                                                                                                                                         |             |            |            |
| <p style="text-align: center;"><b>MW: 226,27 g/mol</b></p>                                                                                            |                                                                                                                                                                                                                                                                                                                                                                                                                                                                                                                                                                                                                                                                                                                                                   |             |            |            |
| <b>Method:</b>                                                                                                                                        | <p>Prepared according to general procedure: in a 4 mL screw-capped vial equipped with a magnetic stirrer, the aryl halide <b>1f</b> (203 mg, 1mmol), triethoxy(4-methoxyphenyl) silane <b>6b</b> (418 mg, 0.406 mL, 1.5 mmol), GVL: H<sub>2</sub>O (4:1, 1 mL), TBAF (1.5 equiv, 488 mg) and <b>Pd/PiNe</b> (0.5 mol%, 5.3 mg) were consecutively added, and the resulting mixture was left under stirring at 130 °C. After 20 h, the catalyst was filtered off and washed with 1 mL of GVL. The product was precipitated with 1 mL of water at 0°C. The precipitate was filtered off, washed with 1 mL of cold water, and purified by filtration on silica pad with toluene to afford product <b>7fb</b> as white solid (168 mg, 74% yield).</p> |             |            |            |
| <b>Mol Formula</b>                                                                                                                                    | C <sub>15</sub> H <sub>14</sub> O <sub>2</sub>                                                                                                                                                                                                                                                                                                                                                                                                                                                                                                                                                                                                                                                                                                    | <b>m.p.</b> | 153-156 °C |            |
| <b>Elemental Analysis:</b> Calc.: C: 79.62; H: 6.24. Found: C: 79.69; H: 6.21                                                                         |                                                                                                                                                                                                                                                                                                                                                                                                                                                                                                                                                                                                                                                                                                                                                   |             |            |            |
| <b><sup>1</sup>H NMR</b><br>(400 MHz, CDCl <sub>3</sub> )                                                                                             | δ value:                                                                                                                                                                                                                                                                                                                                                                                                                                                                                                                                                                                                                                                                                                                                          | No. H       | Mult       | J value/Hz |
|                                                                                                                                                       | 8.01                                                                                                                                                                                                                                                                                                                                                                                                                                                                                                                                                                                                                                                                                                                                              | 2           | <i>d</i>   | 8.0        |
|                                                                                                                                                       | 7.65                                                                                                                                                                                                                                                                                                                                                                                                                                                                                                                                                                                                                                                                                                                                              | 2           | <i>d</i>   | 8.0        |
|                                                                                                                                                       | 7.58                                                                                                                                                                                                                                                                                                                                                                                                                                                                                                                                                                                                                                                                                                                                              | 2           | <i>d</i>   | 8.0        |
|                                                                                                                                                       | 7.00                                                                                                                                                                                                                                                                                                                                                                                                                                                                                                                                                                                                                                                                                                                                              | 2           | <i>d</i>   | 8.0        |
|                                                                                                                                                       | 3.87                                                                                                                                                                                                                                                                                                                                                                                                                                                                                                                                                                                                                                                                                                                                              | 3           | <i>s</i>   |            |
|                                                                                                                                                       | 2.63                                                                                                                                                                                                                                                                                                                                                                                                                                                                                                                                                                                                                                                                                                                                              | 3           | <i>s</i>   |            |
| <b><sup>13</sup>C NMR (100.6 Hz, CDCl<sub>3</sub>)</b> δ: 197.9, 160.1, 145.5, 135.4, 132.4, 129.1, 128.5, 126.8, 114.6, 55.5, 26.8                   |                                                                                                                                                                                                                                                                                                                                                                                                                                                                                                                                                                                                                                                                                                                                                   |             |            |            |
| <b>GC-EIMS (m/z, %):</b> 227 (10), 226 (M <sup>+</sup> , 55), 212 (12), 211 (100), 183 (13), 168 (20), 152 (12), 140 (29), 139 (49), 63 (11), 43 (18) |                                                                                                                                                                                                                                                                                                                                                                                                                                                                                                                                                                                                                                                                                                                                                   |             |            |            |

|                                                                                                                                                   |                                                                                                                                                                                                                                                                                                                                                                                                                                                                                                                                                                                                                                                                                                                                                   |             |            |            |
|---------------------------------------------------------------------------------------------------------------------------------------------------|---------------------------------------------------------------------------------------------------------------------------------------------------------------------------------------------------------------------------------------------------------------------------------------------------------------------------------------------------------------------------------------------------------------------------------------------------------------------------------------------------------------------------------------------------------------------------------------------------------------------------------------------------------------------------------------------------------------------------------------------------|-------------|------------|------------|
| <b>Chem.Name</b>                                                                                                                                  | ethyl 4'-methoxy-[1,1'-biphenyl]-4-carboxylate ( <b>7gb</b> )                                                                                                                                                                                                                                                                                                                                                                                                                                                                                                                                                                                                                                                                                     |             |            |            |
| <b>Lit.Ref</b>                                                                                                                                    | Q. Cao, J. L. Howard, E. Wheatley, D. L. Browne, <i>Angew. Chem. Int. Ed.</i> , 2018, <b>57</b> , 11339 -11343                                                                                                                                                                                                                                                                                                                                                                                                                                                                                                                                                                                                                                    |             |            |            |
| <p style="text-align: center;"><b>MW: 256,30 g/mol</b></p>                                                                                        |                                                                                                                                                                                                                                                                                                                                                                                                                                                                                                                                                                                                                                                                                                                                                   |             |            |            |
| <b>Method:</b>                                                                                                                                    | <p>Prepared according to general procedure: in a 4 mL screw-capped vial equipped with a magnetic stirrer, the aryl halide <b>1g</b> (234 mg, 1mmol), triethoxy(4-methoxyphenyl) silane <b>6b</b> (418 mg, 0.406 mL, 1.5 mmol), GVL: H<sub>2</sub>O (4:1, 1 mL), TBAF (1.5 equiv, 488 mg) and <b>Pd/PiNe</b> (0.5 mol%, 5.3 mg) were consecutively added, and the resulting mixture was left under stirring at 130 °C. After 20 h, the catalyst was filtered off and washed with 1 mL of GVL. The product was precipitated with 1 mL of water at 0°C. The precipitate was filtered off, washed with 1 mL of cold water, and purified by filtration on silica pad with toluene to afford product <b>7gb</b> as white solid (226 mg, 88% yield).</p> |             |            |            |
| <b>Mol Formula</b>                                                                                                                                | C <sub>16</sub> H <sub>16</sub> O <sub>3</sub>                                                                                                                                                                                                                                                                                                                                                                                                                                                                                                                                                                                                                                                                                                    | <b>m.p.</b> | 100-103 °C |            |
| <b>Elemental Analysis:</b> Calc.: C: 74.98; H: 6.29; found: C: 75.01; H: 6.30                                                                     |                                                                                                                                                                                                                                                                                                                                                                                                                                                                                                                                                                                                                                                                                                                                                   |             |            |            |
| <b><sup>1</sup>H NMR</b><br>(400 MHz, CDCl <sub>3</sub> )                                                                                         | $\delta$ value:                                                                                                                                                                                                                                                                                                                                                                                                                                                                                                                                                                                                                                                                                                                                   | No. H       | Mult       | J value/Hz |
|                                                                                                                                                   | 8.08                                                                                                                                                                                                                                                                                                                                                                                                                                                                                                                                                                                                                                                                                                                                              | 2           | <i>d</i>   | 8.4        |
|                                                                                                                                                   | 7.62                                                                                                                                                                                                                                                                                                                                                                                                                                                                                                                                                                                                                                                                                                                                              | 2           | <i>d</i>   | 8.4        |
|                                                                                                                                                   | 7.57                                                                                                                                                                                                                                                                                                                                                                                                                                                                                                                                                                                                                                                                                                                                              | 2           | <i>d</i>   | 8.8        |
|                                                                                                                                                   | 7.00                                                                                                                                                                                                                                                                                                                                                                                                                                                                                                                                                                                                                                                                                                                                              | 2           | <i>d</i>   | 8.8        |
|                                                                                                                                                   | 4.40                                                                                                                                                                                                                                                                                                                                                                                                                                                                                                                                                                                                                                                                                                                                              | 2           | <i>q</i>   | 7.2        |
|                                                                                                                                                   | 3.86                                                                                                                                                                                                                                                                                                                                                                                                                                                                                                                                                                                                                                                                                                                                              | 3           | <i>s</i>   |            |
|                                                                                                                                                   | 1.41                                                                                                                                                                                                                                                                                                                                                                                                                                                                                                                                                                                                                                                                                                                                              | 3           | <i>t</i>   | 7.2        |
| <b><sup>13</sup>C NMR (100.6 Hz, CDCl<sub>3</sub>)</b> $\delta$ : 166.8, 160.0, 145.4, 132.6, 130.2, 128.8, 128.5, 126.6, 114.5, 61.1, 55.5, 14.5 |                                                                                                                                                                                                                                                                                                                                                                                                                                                                                                                                                                                                                                                                                                                                                   |             |            |            |
| <b>GC-EIMS (m/z, %):</b> 257 (18), 256 (M+, 100), 212 (13), 211 (64), 168 (13), 140 (14), 139 (22)                                                |                                                                                                                                                                                                                                                                                                                                                                                                                                                                                                                                                                                                                                                                                                                                                   |             |            |            |

|                                                                                                                                                                                                                                                                                                                                                                                                                                                                                                                                                                                                                                                                                                                                                                 |                                                                                                                                                           |             |            |            |
|-----------------------------------------------------------------------------------------------------------------------------------------------------------------------------------------------------------------------------------------------------------------------------------------------------------------------------------------------------------------------------------------------------------------------------------------------------------------------------------------------------------------------------------------------------------------------------------------------------------------------------------------------------------------------------------------------------------------------------------------------------------------|-----------------------------------------------------------------------------------------------------------------------------------------------------------|-------------|------------|------------|
| <b>Chem.Name</b>                                                                                                                                                                                                                                                                                                                                                                                                                                                                                                                                                                                                                                                                                                                                                | 4-methoxy-4'-methyl-1,1'-biphenyl ( <b>7db</b> )                                                                                                          |             |            |            |
| <b>Lit.Ref</b>                                                                                                                                                                                                                                                                                                                                                                                                                                                                                                                                                                                                                                                                                                                                                  | E. Ismalaj, G. Strappaveccia, E. Ballerini, F. Elisei, O. Piermatti, D. Gelman, L. Vaccaro <i>ACS Sustainable Chem. Eng.</i> , <b>2014</b> , 2, 2461-2464 |             |            |            |
| 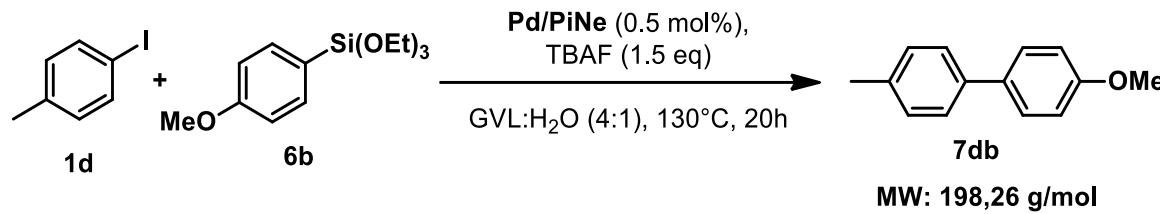 <p style="text-align: center;"><b>MW: 198,26 g/mol</b></p>                                                                                                                                                                                                                                                                                                                                                                                                                                                                                                                                                                                                                   |                                                                                                                                                           |             |            |            |
| <b>Method:</b>                                                                                                                                                                                                                                                                                                                                                                                                                                                                                                                                                                                                                                                                                                                                                  |                                                                                                                                                           |             |            |            |
| <p>Prepared according to general procedure: in a 4 mL screw-capped vial equipped with a magnetic stirrer, the aryl halide <b>1d</b> (220 mg, 1mmol), triethoxy(4-methoxyphenyl) silane <b>6b</b> (418 mg, 0.406 mL, 1.5 mmol), GVL: H<sub>2</sub>O (4:1, 1 mL), TBAF (1.5 equiv, 488 mg) and <b>Pd/PiNe</b> (0.5 mol%, 5.3 mg) were consecutively added, and the resulting mixture was left under stirring at 130 °C. After 20 h, the catalyst was filtered off and washed with 1 mL of GVL. The product was precipitated with 1 mL of water at 0°C. The precipitate was filtered off, washed with 1 mL of cold water, and purified by column chromatography (petroleum ether:EtOAc, 95:5) to afford product <b>7db</b> as white solid (149 mg, 75% yield).</p> |                                                                                                                                                           |             |            |            |
| <b>Mol Formula</b>                                                                                                                                                                                                                                                                                                                                                                                                                                                                                                                                                                                                                                                                                                                                              | C <sub>14</sub> H <sub>14</sub> O                                                                                                                         | <b>m.p.</b> | 110-112 °C |            |
| <b>Elemental Analysis:</b> Calc.: C: 84.81; H: 7.12. found: C: 84.79; H: 7.10                                                                                                                                                                                                                                                                                                                                                                                                                                                                                                                                                                                                                                                                                   |                                                                                                                                                           |             |            |            |
| <b><sup>1</sup>H NMR</b><br>(400 MHz, CDCl <sub>3</sub> )                                                                                                                                                                                                                                                                                                                                                                                                                                                                                                                                                                                                                                                                                                       | δ value:                                                                                                                                                  | No. H       | Mult       | J value/Hz |
|                                                                                                                                                                                                                                                                                                                                                                                                                                                                                                                                                                                                                                                                                                                                                                 | 7.51                                                                                                                                                      | 2           | <i>d</i>   | 8          |
|                                                                                                                                                                                                                                                                                                                                                                                                                                                                                                                                                                                                                                                                                                                                                                 | 7.45                                                                                                                                                      | 2           | <i>d</i>   | 8          |
|                                                                                                                                                                                                                                                                                                                                                                                                                                                                                                                                                                                                                                                                                                                                                                 | 7.23                                                                                                                                                      | 2           | <i>d</i>   | 8          |
|                                                                                                                                                                                                                                                                                                                                                                                                                                                                                                                                                                                                                                                                                                                                                                 | 6.97                                                                                                                                                      | 2           | <i>d</i>   | 8          |
|                                                                                                                                                                                                                                                                                                                                                                                                                                                                                                                                                                                                                                                                                                                                                                 | 3.85                                                                                                                                                      | 3           | <i>s</i>   |            |
|                                                                                                                                                                                                                                                                                                                                                                                                                                                                                                                                                                                                                                                                                                                                                                 | 2.39                                                                                                                                                      | 3           | <i>s</i>   |            |
| <b><sup>13</sup>C NMR (100.6 Hz, CDCl<sub>3</sub>)</b> δ: 159.1, 138.1, 136.5, 133.9, 129.6, 128.1, 126.7, 114.3, 55.5, 21.2                                                                                                                                                                                                                                                                                                                                                                                                                                                                                                                                                                                                                                    |                                                                                                                                                           |             |            |            |
| <b>GC-EIMS (m/z, %):</b> 199 (14), 198 (M <sup>+</sup> , 100), 183 (59), 155 (44), 154 (11), 153 (17), 152 (17), 128 (16), 127 (10), 115 (12)                                                                                                                                                                                                                                                                                                                                                                                                                                                                                                                                                                                                                   |                                                                                                                                                           |             |            |            |

|                                                                                                                                                                   |                                                                                                                                                                                                                                                                                                                                                                                                                                                                                                                                                                                                                                                                                                                    |             |           |            |
|-------------------------------------------------------------------------------------------------------------------------------------------------------------------|--------------------------------------------------------------------------------------------------------------------------------------------------------------------------------------------------------------------------------------------------------------------------------------------------------------------------------------------------------------------------------------------------------------------------------------------------------------------------------------------------------------------------------------------------------------------------------------------------------------------------------------------------------------------------------------------------------------------|-------------|-----------|------------|
| <b>Chem.Name</b>                                                                                                                                                  | 1-(4-methoxyphenyl)naphthalene ( <b>7ib</b> )                                                                                                                                                                                                                                                                                                                                                                                                                                                                                                                                                                                                                                                                      |             |           |            |
| <b>Lit.Ref</b>                                                                                                                                                    | E. Ismalaj, G. Strappaveccia, E. Ballerini, F. Elisei, O. Piermatti, D. Gelman, L. Vaccaro <i>ACS Sustainable Chem. Eng.</i> , <b>2014</b> , 2, 2461-2464                                                                                                                                                                                                                                                                                                                                                                                                                                                                                                                                                          |             |           |            |
| <p style="text-align: center;"><b>MW: 234,29 g/mol</b></p>                                                                                                        |                                                                                                                                                                                                                                                                                                                                                                                                                                                                                                                                                                                                                                                                                                                    |             |           |            |
| <b>Method:</b>                                                                                                                                                    | <p>Prepared according to general procedure: in a 4 mL screw-capped vial equipped with a magnetic stirrer, the aryl halide <b>1i</b> (254 mg, 1mmol), triethoxy(4-methoxyphenyl) silane <b>6b</b> (418 mg, 0.406 mL, 1.5 mmol), TBAF (1.5 equiv, 488 mg) and <b>Pd/PiNe</b> (0.5 mol%, 5.3 mg) were consecutively added, and the resulting mixture was left under stirring at 130 °C. After 20 h, the catalyst was filtered off and washed with 1 mL of GVL. The product was precipitated with 1 mL of water at 0°C. The precipitate was filtered off, washed with 1 mL of cold water, and purified by column chromatography (petroleum ether) to afford product <b>7ib</b> as white solid (211 mg, 90% yield).</p> |             |           |            |
| <b>Mol Formula</b>                                                                                                                                                | C <sub>17</sub> H <sub>14</sub> O                                                                                                                                                                                                                                                                                                                                                                                                                                                                                                                                                                                                                                                                                  | <b>m.p.</b> | 114-116°C |            |
| <b>Elemental Analysis:</b> Calc.: C: 87.15; H: 6.02. found: C: 87.25; H: 6.04                                                                                     |                                                                                                                                                                                                                                                                                                                                                                                                                                                                                                                                                                                                                                                                                                                    |             |           |            |
| <b><sup>1</sup>H NMR</b><br>(400 MHz, CDCl <sub>3</sub> )                                                                                                         | δ value:                                                                                                                                                                                                                                                                                                                                                                                                                                                                                                                                                                                                                                                                                                           | No. H       | Mult      | J value/Hz |
|                                                                                                                                                                   | 7.91                                                                                                                                                                                                                                                                                                                                                                                                                                                                                                                                                                                                                                                                                                               | 2           | <i>t</i>  | 8          |
|                                                                                                                                                                   | 7.84                                                                                                                                                                                                                                                                                                                                                                                                                                                                                                                                                                                                                                                                                                               | 1           | <i>d</i>  | 8          |
|                                                                                                                                                                   | 7.50                                                                                                                                                                                                                                                                                                                                                                                                                                                                                                                                                                                                                                                                                                               | 2           | <i>q</i>  | 8          |
|                                                                                                                                                                   | 7.45-7.40                                                                                                                                                                                                                                                                                                                                                                                                                                                                                                                                                                                                                                                                                                          | 4           | <i>m</i>  |            |
|                                                                                                                                                                   | 7.04                                                                                                                                                                                                                                                                                                                                                                                                                                                                                                                                                                                                                                                                                                               | 2           | <i>d</i>  | 8          |
|                                                                                                                                                                   | 3.90                                                                                                                                                                                                                                                                                                                                                                                                                                                                                                                                                                                                                                                                                                               | 3           | <i>s</i>  |            |
| <b><sup>13</sup>C NMR (100.6 Hz, CDCl<sub>3</sub>)</b> δ: 159.1, 140.1, 134.0, 133.3, 132.0, 131.3, 128.4, 127.5, 127.1, 126.2, 126.1, 125.8, 125.6, 113.9, 55.5. |                                                                                                                                                                                                                                                                                                                                                                                                                                                                                                                                                                                                                                                                                                                    |             |           |            |
| <b>GC-EIMS (m/z, %):</b> 235 (31), 234 (M <sup>+</sup> , 100), 219 (50), 203 (15), 202 (11), 191 (33), 190 (39), 189 (56), 101 (10), 94 (11)                      |                                                                                                                                                                                                                                                                                                                                                                                                                                                                                                                                                                                                                                                                                                                    |             |           |            |

|                                                                                                                                                                                                                                                                                                                                                                                                                                                                                                                                                                                                                                                                                                                                                                                                                                                      |                                                     |             |            |            |
|------------------------------------------------------------------------------------------------------------------------------------------------------------------------------------------------------------------------------------------------------------------------------------------------------------------------------------------------------------------------------------------------------------------------------------------------------------------------------------------------------------------------------------------------------------------------------------------------------------------------------------------------------------------------------------------------------------------------------------------------------------------------------------------------------------------------------------------------------|-----------------------------------------------------|-------------|------------|------------|
| <b>Chem.Name</b>                                                                                                                                                                                                                                                                                                                                                                                                                                                                                                                                                                                                                                                                                                                                                                                                                                     | (E)-1-nitro-4-styrylbenzene ( <b>8ea</b> )          |             |            |            |
| <b>Lit.Ref</b>                                                                                                                                                                                                                                                                                                                                                                                                                                                                                                                                                                                                                                                                                                                                                                                                                                       | <i>ChemistrySelect</i> , <b>2019</b> , 4, 6913-6916 |             |            |            |
| <p style="text-align: center;"><b>MW: 225.24 g/mol</b></p>                                                                                                                                                                                                                                                                                                                                                                                                                                                                                                                                                                                                                                                                                                                                                                                           |                                                     |             |            |            |
| <b>Method:</b>                                                                                                                                                                                                                                                                                                                                                                                                                                                                                                                                                                                                                                                                                                                                                                                                                                       |                                                     |             |            |            |
| <p>Prepared according to general procedure: In a 4 mL screw-capped vial equipped with a magnetic stirrer were consecutively added 1-bromo-4-nitrobenzene <b>1e</b> (1 mmol, 202 mg), <b>Pd/PiNe</b> (0.5 mol%, 5.3 mg), TBAF (1.5 equiv, 488 mg), triethoxyvinylsilane <b>6c</b> (1.5 mmol, 326 <math>\mu</math>L), GVL (0.8 mL), and aq. t-Bu-phenol solution (7<math>\mu</math>M, 0.2 mL) and the resulting mixture was left under stirring at 130 °C. After 16 h, iodobenzene <b>1a</b> (1.1 eq) was added and the mixture was kept under stirring at 130°C. After 3 h, the catalyst was filtered off and washed with 1 mL of GVL. The crude material was precipitated with 1 mL of water at 0°C and purified by column chromatography (petroleum ether:EtOAc, 95:5) to afford product <b>8ea</b> as a pale yellow solid (136 mg, 60% yield).</p> |                                                     |             |            |            |
| <b>Mol Formula</b>                                                                                                                                                                                                                                                                                                                                                                                                                                                                                                                                                                                                                                                                                                                                                                                                                                   | C <sub>14</sub> H <sub>11</sub> NO <sub>2</sub>     | <b>m.p.</b> | 155-159 °C |            |
| <b>Elemental Analysis:</b> Calc: C: 74.65; H: 4.92; N: 6.22; found: C: 74.72; H: 4.94; N: 6.20                                                                                                                                                                                                                                                                                                                                                                                                                                                                                                                                                                                                                                                                                                                                                       |                                                     |             |            |            |
| <b><sup>1</sup>H NMR</b><br>(400 MHz, CDCl <sub>3</sub> )                                                                                                                                                                                                                                                                                                                                                                                                                                                                                                                                                                                                                                                                                                                                                                                            | $\delta$ value:                                     | No. H       | Mult       | J value/Hz |
|                                                                                                                                                                                                                                                                                                                                                                                                                                                                                                                                                                                                                                                                                                                                                                                                                                                      | 8.19                                                | 2           | <i>d</i>   | 8.4        |
|                                                                                                                                                                                                                                                                                                                                                                                                                                                                                                                                                                                                                                                                                                                                                                                                                                                      | 7.60                                                | 2           | <i>d</i>   | 8.8        |
|                                                                                                                                                                                                                                                                                                                                                                                                                                                                                                                                                                                                                                                                                                                                                                                                                                                      | 7.53                                                | 2           | <i>d</i>   | 7.6        |
|                                                                                                                                                                                                                                                                                                                                                                                                                                                                                                                                                                                                                                                                                                                                                                                                                                                      | 7.37                                                | 2           | <i>t</i>   | 7.6        |
|                                                                                                                                                                                                                                                                                                                                                                                                                                                                                                                                                                                                                                                                                                                                                                                                                                                      | 7.32-7.29                                           | 1           | <i>m</i>   |            |
|                                                                                                                                                                                                                                                                                                                                                                                                                                                                                                                                                                                                                                                                                                                                                                                                                                                      | 7.22                                                | 1           | <i>d</i>   | 16.4       |
|                                                                                                                                                                                                                                                                                                                                                                                                                                                                                                                                                                                                                                                                                                                                                                                                                                                      | 7.14-7.10                                           | 1           | <i>d</i>   | 16.4       |
| <b><sup>13</sup>C NMR (100.6 Hz, CDCl<sub>3</sub>)</b> $\delta$ : 146.9, 144.0, 136.3, 133.5, 129.0, 129.0, 127.2, 127.0, 126.4, 124.3                                                                                                                                                                                                                                                                                                                                                                                                                                                                                                                                                                                                                                                                                                               |                                                     |             |            |            |
| <b>GC-EIMS (m/z, %):</b> 226 (15), 225 (M+, 100), 179 (40), 176 (17), 165 (15), 152 (27).                                                                                                                                                                                                                                                                                                                                                                                                                                                                                                                                                                                                                                                                                                                                                            |                                                     |             |            |            |

|                                                                                                                                                                                                                                                                                                                                                                                                                                                                                                                                                                                                                                                                                                                                                                                                                                             |                                                     |             |            |            |
|---------------------------------------------------------------------------------------------------------------------------------------------------------------------------------------------------------------------------------------------------------------------------------------------------------------------------------------------------------------------------------------------------------------------------------------------------------------------------------------------------------------------------------------------------------------------------------------------------------------------------------------------------------------------------------------------------------------------------------------------------------------------------------------------------------------------------------------------|-----------------------------------------------------|-------------|------------|------------|
| <b>Chem.Name</b>                                                                                                                                                                                                                                                                                                                                                                                                                                                                                                                                                                                                                                                                                                                                                                                                                            | (E)-1-(4-styrylphenyl)ethenone ( <b>8fa</b> )       |             |            |            |
| <b>Lit.Ref</b>                                                                                                                                                                                                                                                                                                                                                                                                                                                                                                                                                                                                                                                                                                                                                                                                                              | <i>ChemistrySelect</i> , <b>2019</b> , 4, 6913-6916 |             |            |            |
| <p style="text-align: right;"><b>MW: 222.28 g/mol</b></p>                                                                                                                                                                                                                                                                                                                                                                                                                                                                                                                                                                                                                                                                                                                                                                                   |                                                     |             |            |            |
| <b>Method:</b>                                                                                                                                                                                                                                                                                                                                                                                                                                                                                                                                                                                                                                                                                                                                                                                                                              |                                                     |             |            |            |
| <p>Prepared according to general procedure: In a 4 mL screw-capped vial equipped with a magnetic stirrer were consecutively added 4-bromoacetophenone <b>1f</b> (1 mmol, 199 mg), <b>Pd/PiNe</b> (0.5 mol%, 5.3 mg), TBAF (1.5 equiv, 488 mg), triethoxyvinylsilane <b>6c</b> (1.5 mmol, 326 <math>\mu</math>L), GVL (0.8 mL), and aq. t-Bu-phenol solution (7 <math>\mu</math>M, 0.2 mL) and the resulting mixture was left under stirring at 130 °C. After 16 h, iodobenzene <b>1a</b> (1.1 eq) was added and the mixture was kept under stirring at 130°C. After 3 h, the catalyst was filtered off and washed with 1 mL of GVL. The crude material was precipitated with 1 mL of water at 0°C and purified by column chromatography (petroleum ether:EtOAc, 95:5) to afford product <b>8fa</b> as a white solid (89 mg, 40% yield).</p> |                                                     |             |            |            |
| <b>Mol Formula</b>                                                                                                                                                                                                                                                                                                                                                                                                                                                                                                                                                                                                                                                                                                                                                                                                                          | C <sub>16</sub> H <sub>14</sub> O                   | <b>m.p.</b> | 141-142 °C |            |
| <b>Elemental Analysis:</b> Calc.: C: 86.45; H: 6.35; found: C: 86.52; H: 6.36                                                                                                                                                                                                                                                                                                                                                                                                                                                                                                                                                                                                                                                                                                                                                               |                                                     |             |            |            |
| <b><sup>1</sup>H NMR</b><br>(400 MHz, CDCl <sub>3</sub> )                                                                                                                                                                                                                                                                                                                                                                                                                                                                                                                                                                                                                                                                                                                                                                                   | $\delta$ value:                                     | No. H       | Mult       | J value/Hz |
|                                                                                                                                                                                                                                                                                                                                                                                                                                                                                                                                                                                                                                                                                                                                                                                                                                             | 7.96                                                | 2           | <i>d</i>   | 8.4        |
|                                                                                                                                                                                                                                                                                                                                                                                                                                                                                                                                                                                                                                                                                                                                                                                                                                             | 7.59                                                | 2           | <i>d</i>   | 8.4        |
|                                                                                                                                                                                                                                                                                                                                                                                                                                                                                                                                                                                                                                                                                                                                                                                                                                             | 7.55                                                | 2           | <i>d</i>   | 7.6        |
|                                                                                                                                                                                                                                                                                                                                                                                                                                                                                                                                                                                                                                                                                                                                                                                                                                             | 7.39                                                | 2           | <i>t</i>   | 7.6        |
|                                                                                                                                                                                                                                                                                                                                                                                                                                                                                                                                                                                                                                                                                                                                                                                                                                             | 7.33-7.28                                           | 1           | <i>m</i>   |            |
|                                                                                                                                                                                                                                                                                                                                                                                                                                                                                                                                                                                                                                                                                                                                                                                                                                             | 7.24                                                | 1           | <i>d</i>   | 16.4       |
|                                                                                                                                                                                                                                                                                                                                                                                                                                                                                                                                                                                                                                                                                                                                                                                                                                             | 7.13                                                | 1           | <i>d</i>   | 16.4       |
|                                                                                                                                                                                                                                                                                                                                                                                                                                                                                                                                                                                                                                                                                                                                                                                                                                             | 2.61                                                | 3           | <i>s</i>   |            |
| <b><sup>13</sup>C NMR (100.6 Hz, CDCl<sub>3</sub>)</b> $\delta$ : 197.6, 142.2, 136.8, 136.1, 131.6, 129.0, 128.9, 128.5, 127.6, 127.0, 126.6, 26.7                                                                                                                                                                                                                                                                                                                                                                                                                                                                                                                                                                                                                                                                                         |                                                     |             |            |            |
| <b>GC-EIMS (m/z, %):</b> 223 (27), 222 (M+, 89), 208 (38), 207 (100), 179 (52), 178 (89), 177 (25), 176 (26), 152 (23), 89 (21).                                                                                                                                                                                                                                                                                                                                                                                                                                                                                                                                                                                                                                                                                                            |                                                     |             |            |            |

|                                                                                                                                                                                                                                                                                                                                                                                                                                                                                                                                                                                                                                                                                                                                                                                                                                              |                                                                    |             |            |            |
|----------------------------------------------------------------------------------------------------------------------------------------------------------------------------------------------------------------------------------------------------------------------------------------------------------------------------------------------------------------------------------------------------------------------------------------------------------------------------------------------------------------------------------------------------------------------------------------------------------------------------------------------------------------------------------------------------------------------------------------------------------------------------------------------------------------------------------------------|--------------------------------------------------------------------|-------------|------------|------------|
| <b>Chem.Name</b>                                                                                                                                                                                                                                                                                                                                                                                                                                                                                                                                                                                                                                                                                                                                                                                                                             | (E)-ethyl 4-styrylbenzoate ( <b>8ga</b> )                          |             |            |            |
| <b>Lit.Ref</b>                                                                                                                                                                                                                                                                                                                                                                                                                                                                                                                                                                                                                                                                                                                                                                                                                               | <i>Chemistry, A European Journal</i> , <b>2015</b> , 21, 7061-7065 |             |            |            |
| <p style="text-align: right;"><b>MW: 252.31 g/mol</b></p>                                                                                                                                                                                                                                                                                                                                                                                                                                                                                                                                                                                                                                                                                                                                                                                    |                                                                    |             |            |            |
| <b>Method:</b>                                                                                                                                                                                                                                                                                                                                                                                                                                                                                                                                                                                                                                                                                                                                                                                                                               |                                                                    |             |            |            |
| <p>Prepared according to general procedure: In a 4 mL screw-capped vial equipped with a magnetic stirrer were consecutively added ethyl 4-bromobenzoate <b>1g</b> (1 mmol, 229 mg), <b>Pd/PiNe</b> (0.5 mol%, 5.3 mg), TBAF (1.5 equiv, 488 mg), triethoxyvinylsilane <b>6c</b> (1.5 mmol, 326 <math>\mu</math>L), GVL (0.8 mL), and aq. t-Bu-phenol solution (7<math>\mu</math>M, 0.2 mL) and the resulting mixture was left under stirring at 130 °C. After 16 h, iodobenzene <b>1a</b> (1.1 eq) was added and the mixture was kept under stirring at 130°C. After 3 h, the catalyst was filtered off and washed with 1 mL of GVL. The crude material was precipitated with 1 mL of water at 0°C and purified by column chromatography (petroleum ether:EtOAc, 95:5) to afford product <b>8ga</b> as a white solid (94 mg, 37% yield).</p> |                                                                    |             |            |            |
| <b>Mol Formula</b>                                                                                                                                                                                                                                                                                                                                                                                                                                                                                                                                                                                                                                                                                                                                                                                                                           | C <sub>17</sub> H <sub>16</sub> O <sub>2</sub>                     | <b>m.p.</b> | 108-109 °C |            |
| <b>Elemental Analysis:</b> Calc.: C: 80.93; H: 6.39; found: C: 80.98; H: 6.36                                                                                                                                                                                                                                                                                                                                                                                                                                                                                                                                                                                                                                                                                                                                                                |                                                                    |             |            |            |
| <b><sup>1</sup>H NMR</b><br>(400 MHz, CDCl <sub>3</sub> )                                                                                                                                                                                                                                                                                                                                                                                                                                                                                                                                                                                                                                                                                                                                                                                    | $\delta$ value:                                                    | No. H       | Mult       | J value/Hz |
|                                                                                                                                                                                                                                                                                                                                                                                                                                                                                                                                                                                                                                                                                                                                                                                                                                              | 8.03                                                               | 2           | <i>d</i>   | 8.4        |
|                                                                                                                                                                                                                                                                                                                                                                                                                                                                                                                                                                                                                                                                                                                                                                                                                                              | 7.58-7.53                                                          | 4           | <i>m</i>   |            |
|                                                                                                                                                                                                                                                                                                                                                                                                                                                                                                                                                                                                                                                                                                                                                                                                                                              | 7.38                                                               | 2           | <i>t</i>   | 7.6        |
|                                                                                                                                                                                                                                                                                                                                                                                                                                                                                                                                                                                                                                                                                                                                                                                                                                              | 7.31-7.24                                                          | 1           | <i>m</i>   |            |
|                                                                                                                                                                                                                                                                                                                                                                                                                                                                                                                                                                                                                                                                                                                                                                                                                                              | 7.22                                                               | 1           | <i>d</i>   | 16.4       |
|                                                                                                                                                                                                                                                                                                                                                                                                                                                                                                                                                                                                                                                                                                                                                                                                                                              | 7.13                                                               | 1           | <i>d</i>   | 16.4       |
|                                                                                                                                                                                                                                                                                                                                                                                                                                                                                                                                                                                                                                                                                                                                                                                                                                              | 4.39                                                               | 2           | <i>q</i>   | 7.2        |
|                                                                                                                                                                                                                                                                                                                                                                                                                                                                                                                                                                                                                                                                                                                                                                                                                                              | 1.41                                                               | 3           | <i>t</i>   | 7.2        |
| <b><sup>13</sup>C NMR (100.6 Hz, CDCl<sub>3</sub>)</b> $\delta$ : 166.6, 141.9, 136.9, 131.3, 130.1, 129.4, 128.9, 128.4, 127.8, 126.9, 126.4, 61.1, 14.5                                                                                                                                                                                                                                                                                                                                                                                                                                                                                                                                                                                                                                                                                    |                                                                    |             |            |            |
| <b>GC-EIMS (m/z, %):</b> 253 (19), 252 (M+, 100), 207 (54), 180 (12), 179 (77), 178 (63).                                                                                                                                                                                                                                                                                                                                                                                                                                                                                                                                                                                                                                                                                                                                                    |                                                                    |             |            |            |

|                                                                                                                                                                                                                                                        |                                                                                                                                                                                                                                                                                                                                                                                                                                                                                                                                                                                                                                                                                                                                       |             |                    |            |
|--------------------------------------------------------------------------------------------------------------------------------------------------------------------------------------------------------------------------------------------------------|---------------------------------------------------------------------------------------------------------------------------------------------------------------------------------------------------------------------------------------------------------------------------------------------------------------------------------------------------------------------------------------------------------------------------------------------------------------------------------------------------------------------------------------------------------------------------------------------------------------------------------------------------------------------------------------------------------------------------------------|-------------|--------------------|------------|
| <b>Chem.Name</b>                                                                                                                                                                                                                                       | (E)-1,2-bis(4-nitrophenyl)ethene ( <b>8jj</b> )                                                                                                                                                                                                                                                                                                                                                                                                                                                                                                                                                                                                                                                                                       |             |                    |            |
| <b>Lit.Ref</b>                                                                                                                                                                                                                                         | <i>EurJOC</i> , <b>2006</b> , 5, 1323-1334                                                                                                                                                                                                                                                                                                                                                                                                                                                                                                                                                                                                                                                                                            |             |                    |            |
| <p style="text-align: center;"><b>1j</b> + <b>6c</b> <math>\xrightarrow[\text{TBAF(1.5 eq), GVL:H}_2\text{O (4:1), 130}^\circ\text{C, 16h}]{\text{Pd/PiNe (0.5mol\%)}}</math> <b>8jj</b></p> <p style="text-align: right;"><b>MW: 270.24 g/mol</b></p> |                                                                                                                                                                                                                                                                                                                                                                                                                                                                                                                                                                                                                                                                                                                                       |             |                    |            |
| <b>Method:</b>                                                                                                                                                                                                                                         | <p>Prepared according to general procedure: In a 4 mL screw-capped vial equipped with a magnetic stirrer were consecutively added 1-iodo-4-nitrobenzene <b>1e</b> (1 mmol, 254 mg), <b>Pd/PiNe</b> (0.5 mol%, 2.6 mg), TBAF (1.1 eq, 179 mg), triethoxyvinylsilane <b>6c</b> (0.5 mmol, 109 <math>\mu</math>L), GVL (0.8 mL), and aq. t-Bu-phenol solution (7 <math>\mu</math>M, 0.2 mL) and the resulting mixture was left under stirring at 130 <math>^\circ</math>C. After 16 h, the catalyst was filtered off and washed with 1 mL of GVL. The crude material was precipitated with 1 mL of water at 0<math>^\circ</math>C and washed with petroleum ether to afford product <b>8jj</b> as a yellow solid (70 mg, 52% yield).</p> |             |                    |            |
| <b>Mol Formula</b>                                                                                                                                                                                                                                     | $\text{C}_{14}\text{H}_{10}\text{N}_2\text{O}_4$                                                                                                                                                                                                                                                                                                                                                                                                                                                                                                                                                                                                                                                                                      | <b>m.p.</b> | 234-235 $^\circ$ C |            |
| <b>Elemental Analysis:</b> Calc.: C: 62.22; H: 3.73; N: 10.37; found C: 62.32; H: 3.75; N: 10.40                                                                                                                                                       |                                                                                                                                                                                                                                                                                                                                                                                                                                                                                                                                                                                                                                                                                                                                       |             |                    |            |
| <b><math>^1\text{H NMR}</math><br/>(400 MHz, <math>\text{CDCl}_3</math>)</b>                                                                                                                                                                           | $\delta$ value:                                                                                                                                                                                                                                                                                                                                                                                                                                                                                                                                                                                                                                                                                                                       | No. H       | Mult               | J value/Hz |
|                                                                                                                                                                                                                                                        | 8.27                                                                                                                                                                                                                                                                                                                                                                                                                                                                                                                                                                                                                                                                                                                                  | 4           | <i>d</i>           | 8.4        |
|                                                                                                                                                                                                                                                        | 7.69                                                                                                                                                                                                                                                                                                                                                                                                                                                                                                                                                                                                                                                                                                                                  | 4           | <i>d</i>           | 8.4        |
|                                                                                                                                                                                                                                                        | 7.30                                                                                                                                                                                                                                                                                                                                                                                                                                                                                                                                                                                                                                                                                                                                  | 2           | <i>s</i>           |            |
| <b><math>^{13}\text{C NMR}</math> (100.6 Hz, <math>\text{CDCl}_3</math>) <math>\delta</math>:</b> 147.6, 142.6, 130.8, 127.6, 124.4                                                                                                                    |                                                                                                                                                                                                                                                                                                                                                                                                                                                                                                                                                                                                                                                                                                                                       |             |                    |            |
| <b>GC-EIMS (m/z, %):</b> 271 (16) 270 ( $\text{M}^+$ , 100), 178 (24), 177 (20), 176 (30), 166 (26), 165 (44).                                                                                                                                         |                                                                                                                                                                                                                                                                                                                                                                                                                                                                                                                                                                                                                                                                                                                                       |             |                    |            |



|                                                                                                                                       |                                                                                                                                                                                                                                                                                                                                                                                                                                                                                                                                                                                                                                                                                         |             |            |            |
|---------------------------------------------------------------------------------------------------------------------------------------|-----------------------------------------------------------------------------------------------------------------------------------------------------------------------------------------------------------------------------------------------------------------------------------------------------------------------------------------------------------------------------------------------------------------------------------------------------------------------------------------------------------------------------------------------------------------------------------------------------------------------------------------------------------------------------------------|-------------|------------|------------|
| <b>Chem.Name</b>                                                                                                                      | (E)-1,2-bis(4-methoxyphenyl)ethene ( <b>8hh</b> )                                                                                                                                                                                                                                                                                                                                                                                                                                                                                                                                                                                                                                       |             |            |            |
| <b>Lit.Ref</b>                                                                                                                        | <i>Appl Organometal Chem.</i> , <b>2019</b> ; 33, e4618                                                                                                                                                                                                                                                                                                                                                                                                                                                                                                                                                                                                                                 |             |            |            |
| <p style="text-align: center;"><b>1h</b>      <b>6c</b>      <b>8hh</b></p> <p style="text-align: right;"><b>MW: 240.30 g/mol</b></p> |                                                                                                                                                                                                                                                                                                                                                                                                                                                                                                                                                                                                                                                                                         |             |            |            |
| <b>Method:</b>                                                                                                                        | <p>Prepared according to general procedure: In a 4 mL screw-capped vial equipped with a magnetic stirrer were consecutively added 4-iodoanisole <b>1h</b> (1 mmol, 238 mg), <b>Pd/PiNe</b> (0.5 mol%, 2.6 mg), TBAF (1.1 eq, 179 mg), triethoxyvinylsilane <b>6c</b> (0.5 mmol, 109 <math>\mu</math>L), GVL (0.8 mL), and aq. t-Bu-phenol solution (7<math>\mu</math>M, 0.2 mL) and the resulting mixture was left under stirring at 130 °C. After 16 h, the catalyst was filtered off and washed with 1 mL of GVL. The crude material was precipitated with 1 mL of water at 0°C and washed with petroleum ether to afford product <b>8hh</b> as a white solid (49 mg, 41% yield).</p> |             |            |            |
| <b>Mol Formula</b>                                                                                                                    | C <sub>16</sub> H <sub>16</sub> O <sub>2</sub>                                                                                                                                                                                                                                                                                                                                                                                                                                                                                                                                                                                                                                          | <b>m.p.</b> | 100-101 °C |            |
| Elemental Analysis: Calc: C: 79.97; H: 6.71; found: C: 80.00; H: 6.72                                                                 |                                                                                                                                                                                                                                                                                                                                                                                                                                                                                                                                                                                                                                                                                         |             |            |            |
| <b><sup>1</sup>H NMR</b><br>(400 MHz, CDCl <sub>3</sub> )                                                                             | $\delta$ value:                                                                                                                                                                                                                                                                                                                                                                                                                                                                                                                                                                                                                                                                         | No. H       | Mult       | J value/Hz |
|                                                                                                                                       | 7.43                                                                                                                                                                                                                                                                                                                                                                                                                                                                                                                                                                                                                                                                                    | 4           | <i>d</i>   | 8.8        |
|                                                                                                                                       | 6.93                                                                                                                                                                                                                                                                                                                                                                                                                                                                                                                                                                                                                                                                                    | 2           | <i>s</i>   |            |
|                                                                                                                                       | 6.89                                                                                                                                                                                                                                                                                                                                                                                                                                                                                                                                                                                                                                                                                    | 4           | <i>d</i>   | 8.8        |
|                                                                                                                                       | 3.83                                                                                                                                                                                                                                                                                                                                                                                                                                                                                                                                                                                                                                                                                    | 6           | <i>s</i>   |            |
| <b><sup>13</sup>C NMR (100.6 Hz, CDCl<sub>3</sub>)</b> $\delta$ : 159.2, 130.6, 127.6, 126.3, 114.3, 55.5                             |                                                                                                                                                                                                                                                                                                                                                                                                                                                                                                                                                                                                                                                                                         |             |            |            |
| <b>GC-EIMS (m/z, %):</b> 241 (18), 240 (M+, 100), 225 (51).                                                                           |                                                                                                                                                                                                                                                                                                                                                                                                                                                                                                                                                                                                                                                                                         |             |            |            |

#### 4. <sup>1</sup>H and <sup>13</sup>C NMR spectra

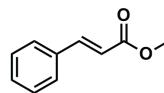

methyl cinnamate (3aa)

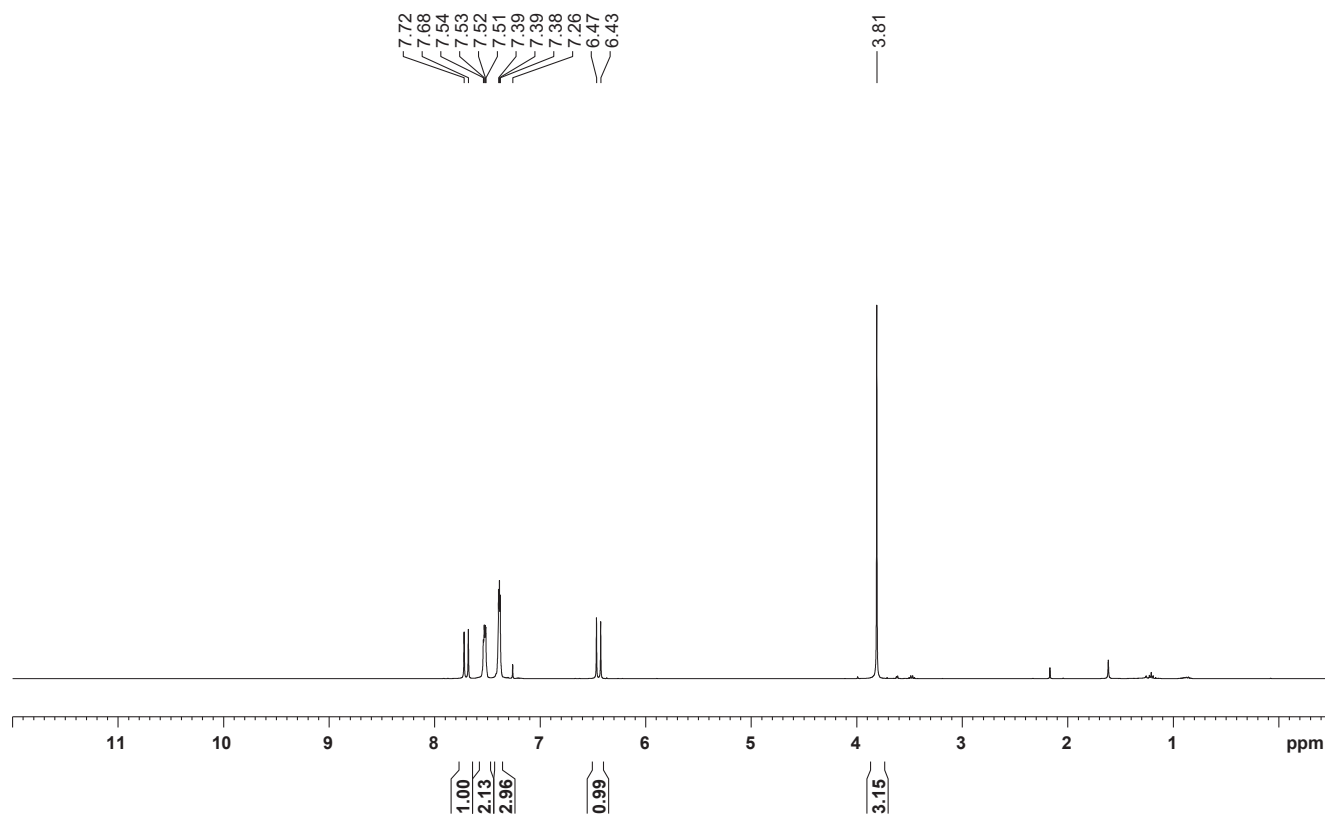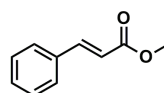

methyl cinnamate (3aa)

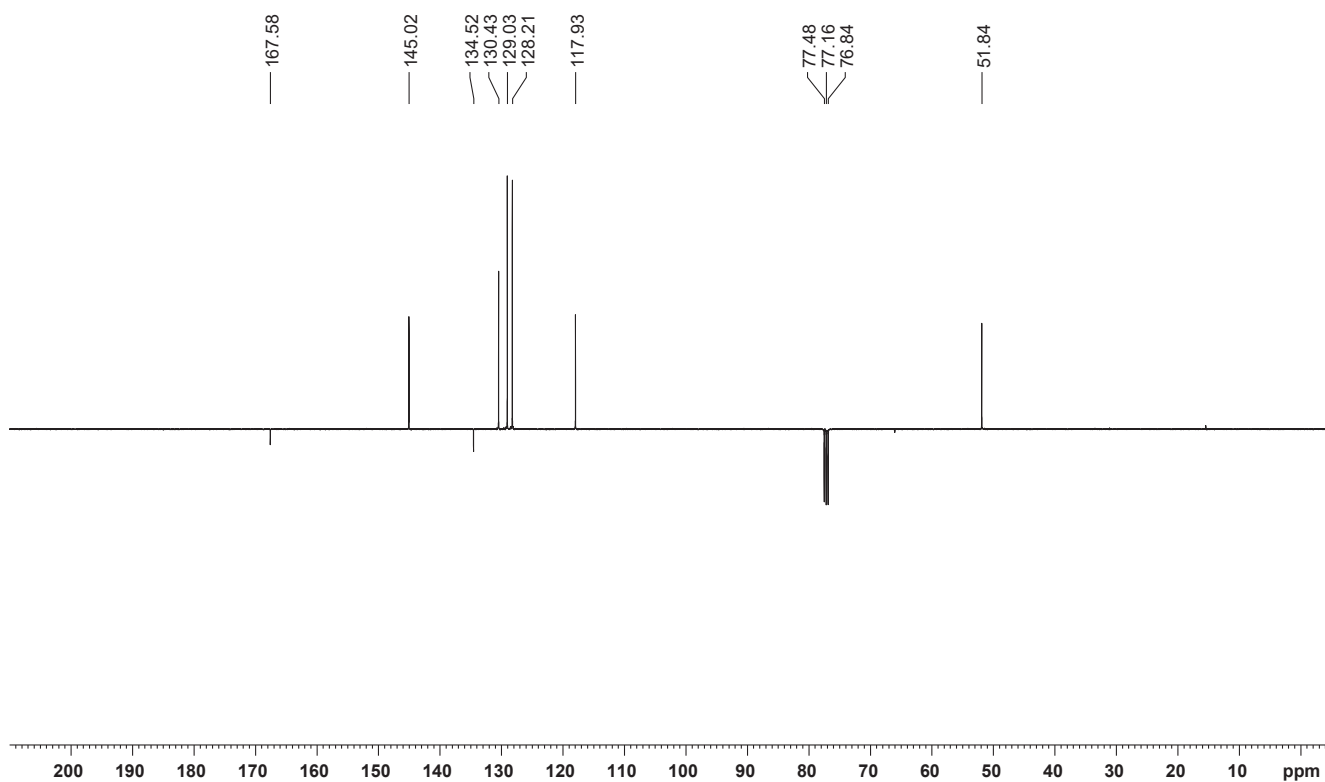

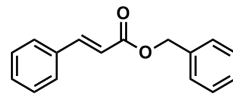

benzyl cinnamate (3ab)

7.76  
7.72  
7.54  
7.53  
7.52  
7.52  
7.45  
7.44  
7.42  
7.42  
7.41  
7.40  
7.39  
7.38  
7.37  
7.36  
7.36  
7.35  
7.26  
6.52  
6.48  
5.27

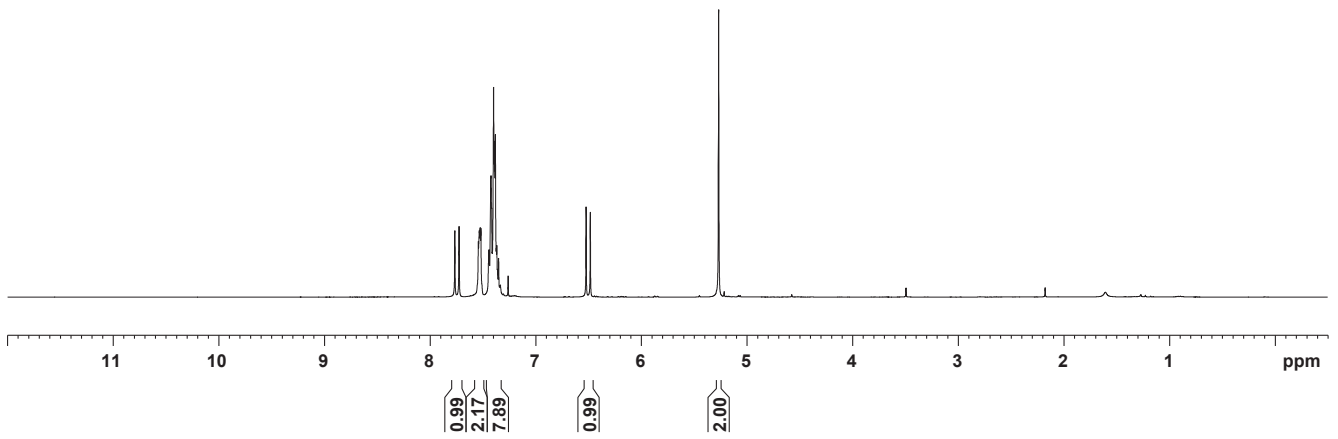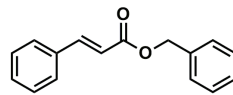

benzyl cinnamate (3ab)

166.93  
145.32  
136.19  
134.48  
130.48  
129.03  
128.73  
128.42  
128.39  
128.24  
118.00  
77.48  
77.16  
76.84  
66.50

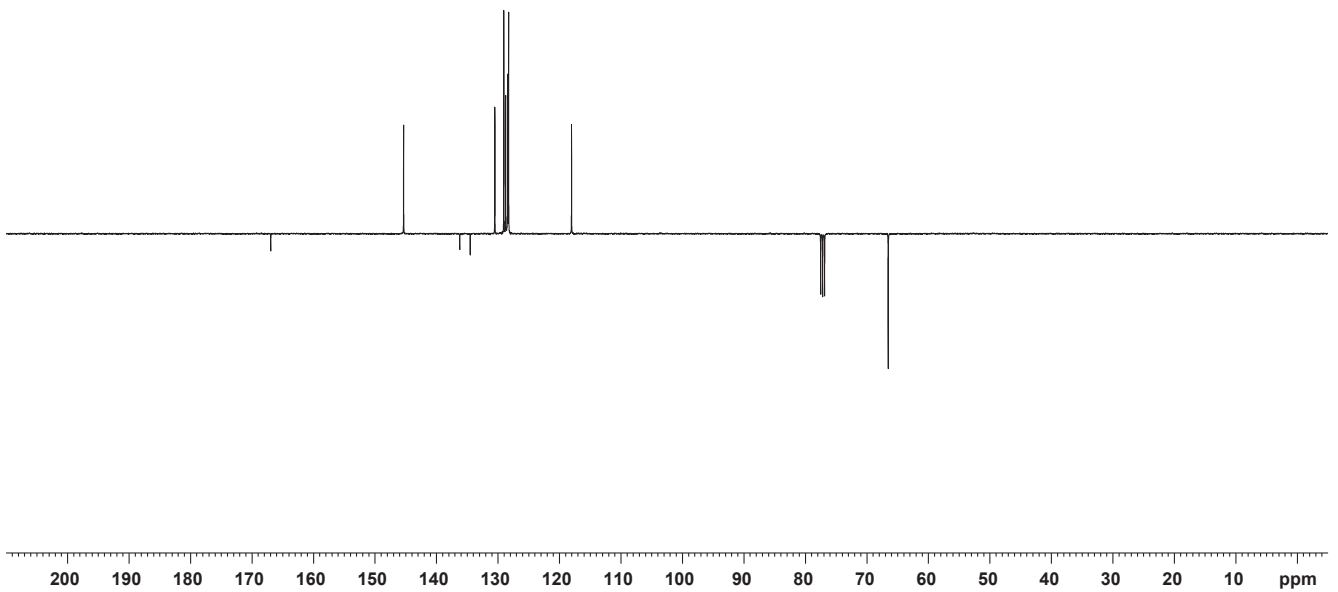

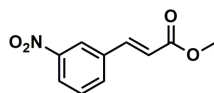

(E)-methyl 3-(3-nitrophenyl)acrylate (**3ba**)

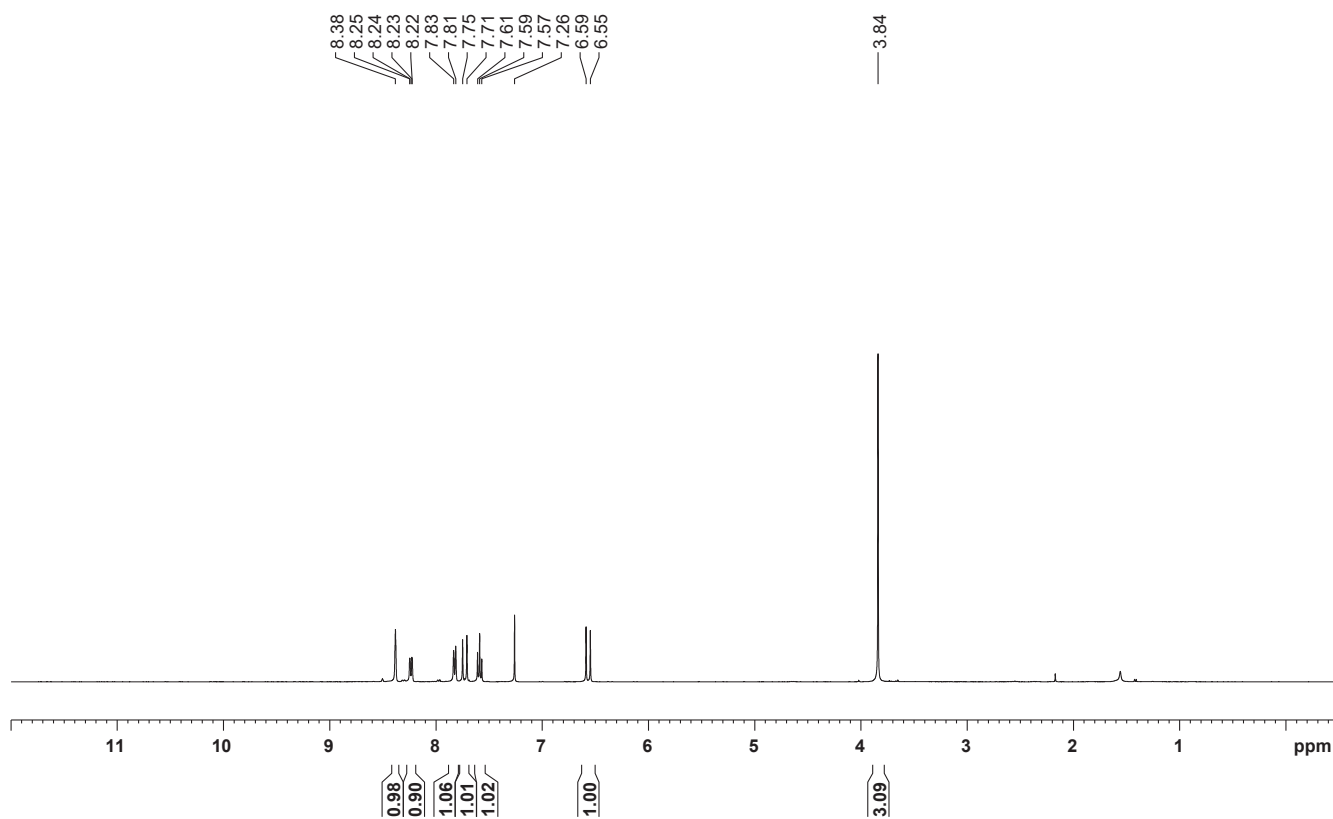

(E)-methyl 3-(3-nitrophenyl)acrylate (**3ba**)

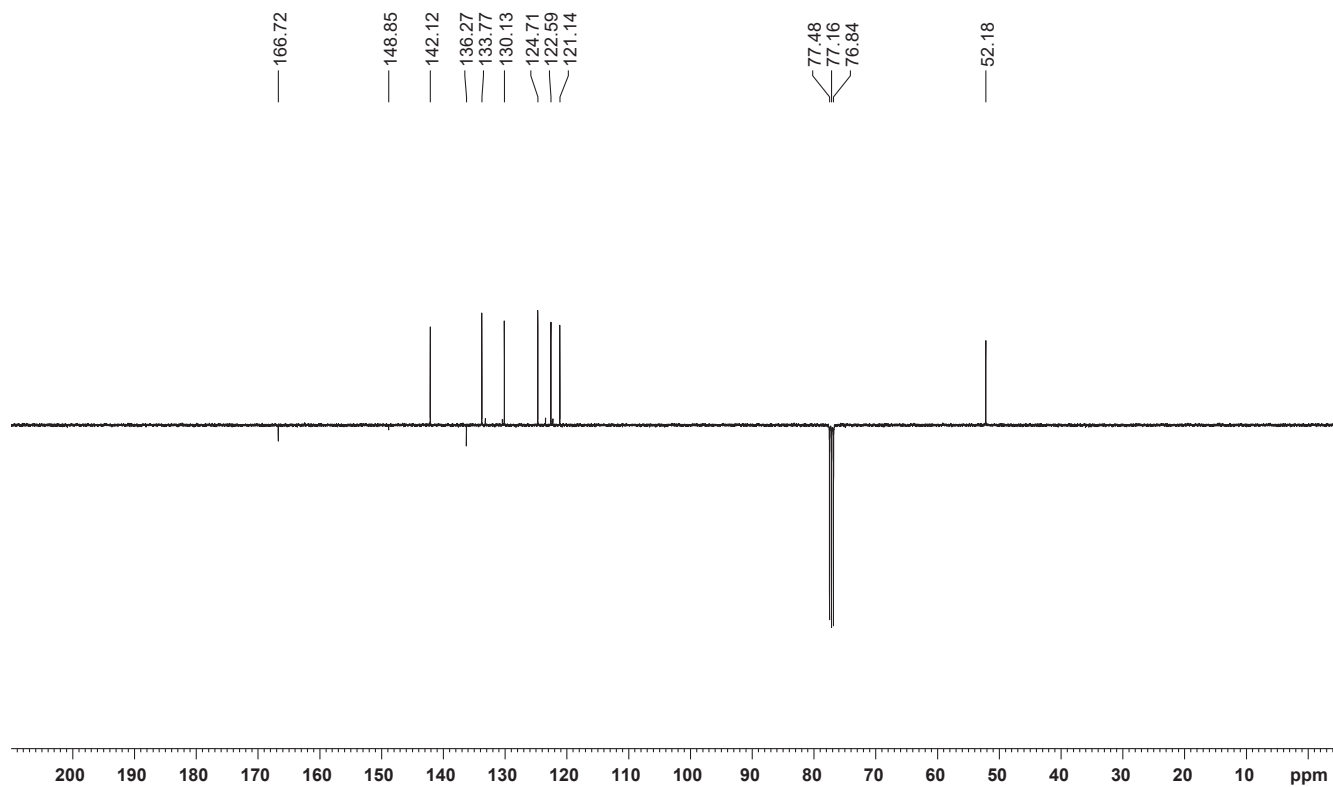

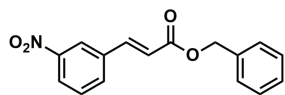

(E)-benzyl 3-(3-nitrophenyl)acrylate (**3bb**)

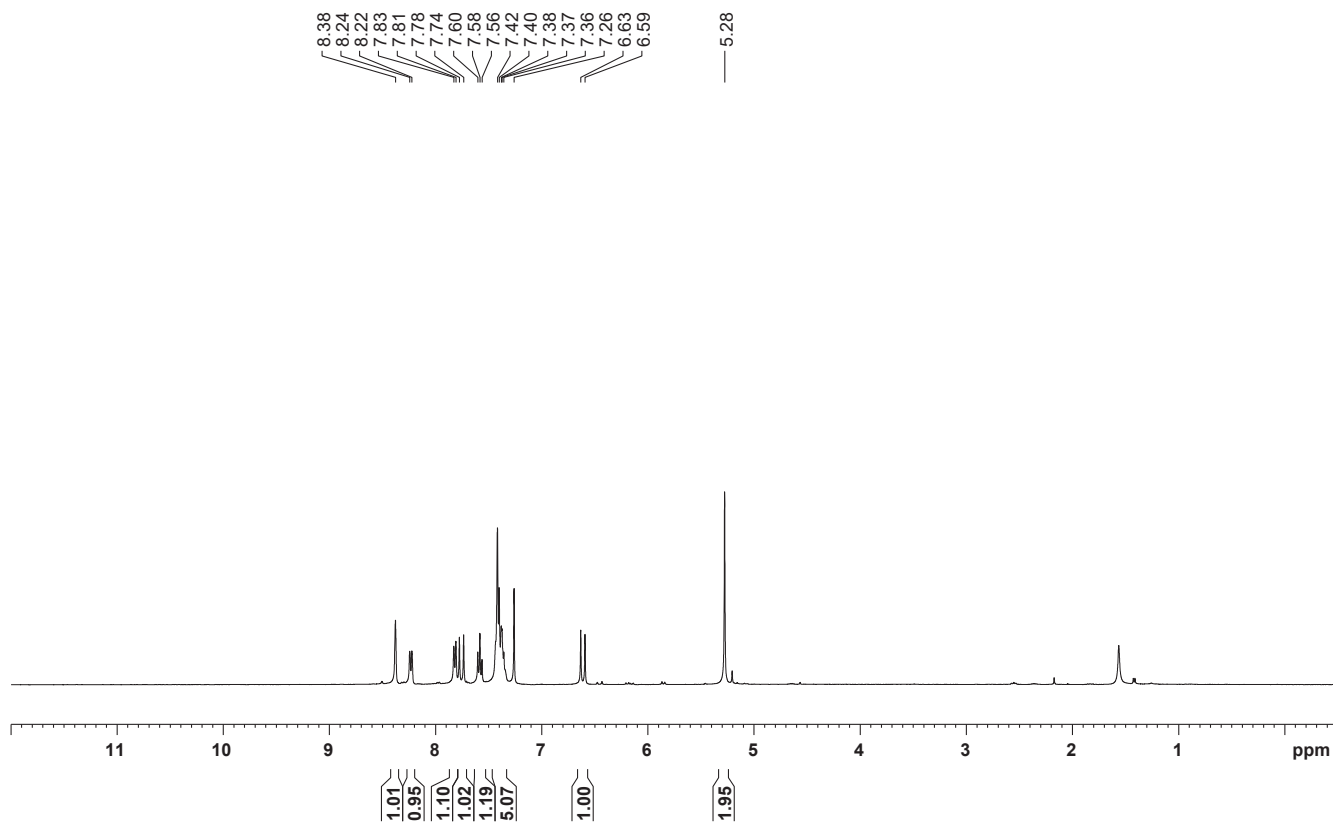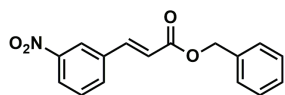

(E)-benzyl 3-(3-nitrophenyl)acrylate (**3bb**)

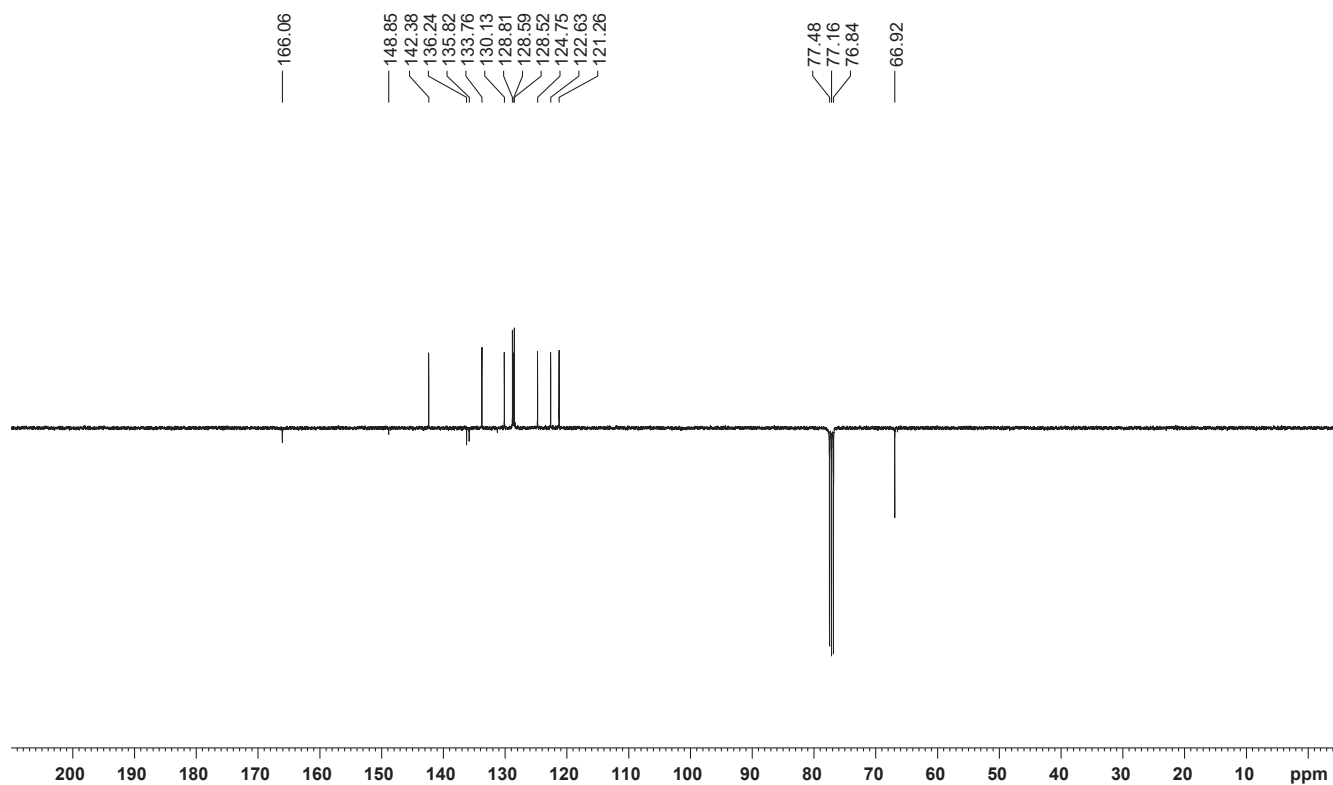

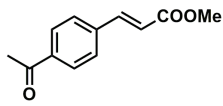

(E)-methyl 3-(4-acetylphenyl)acrylate (**3ca**)

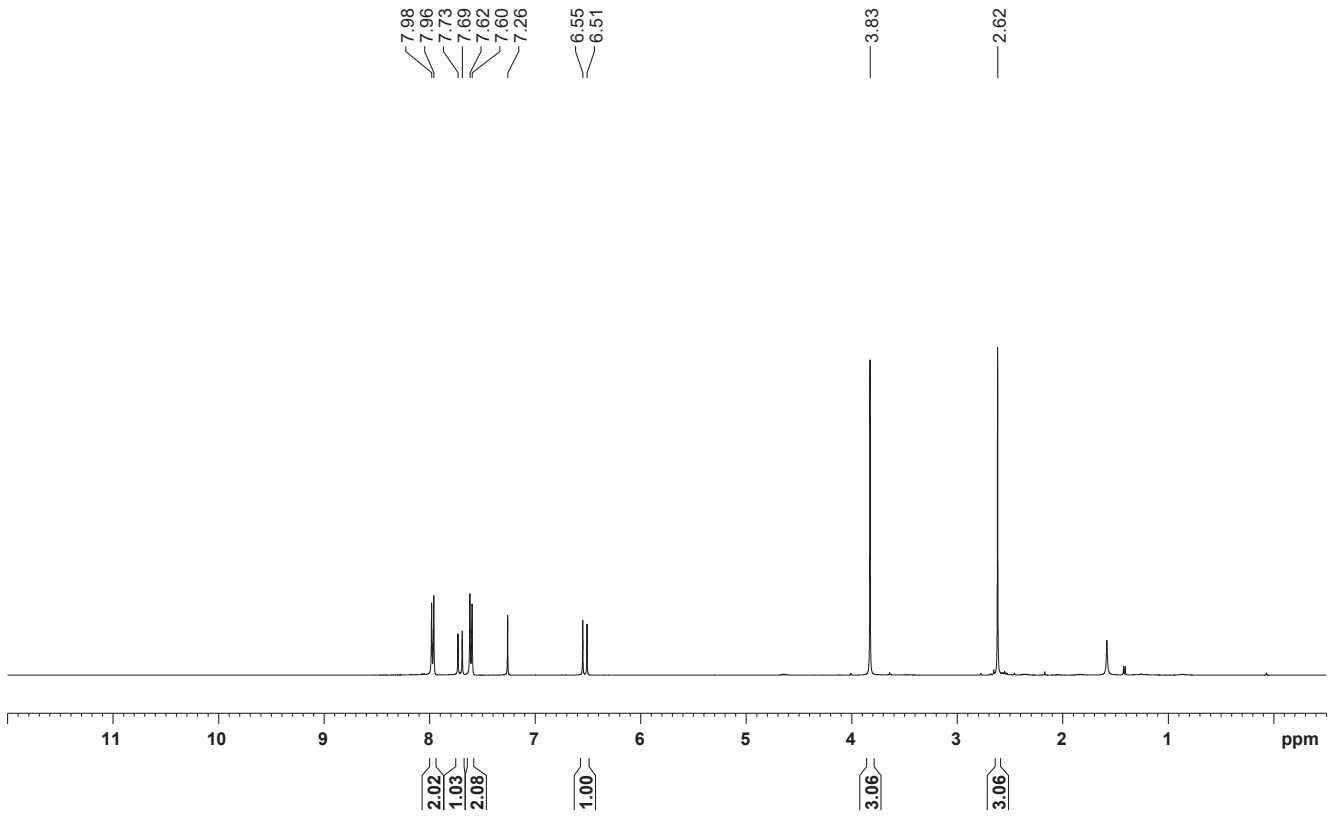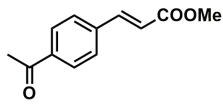

(E)-methyl 3-(4-acetylphenyl)acrylate (**3ca**)

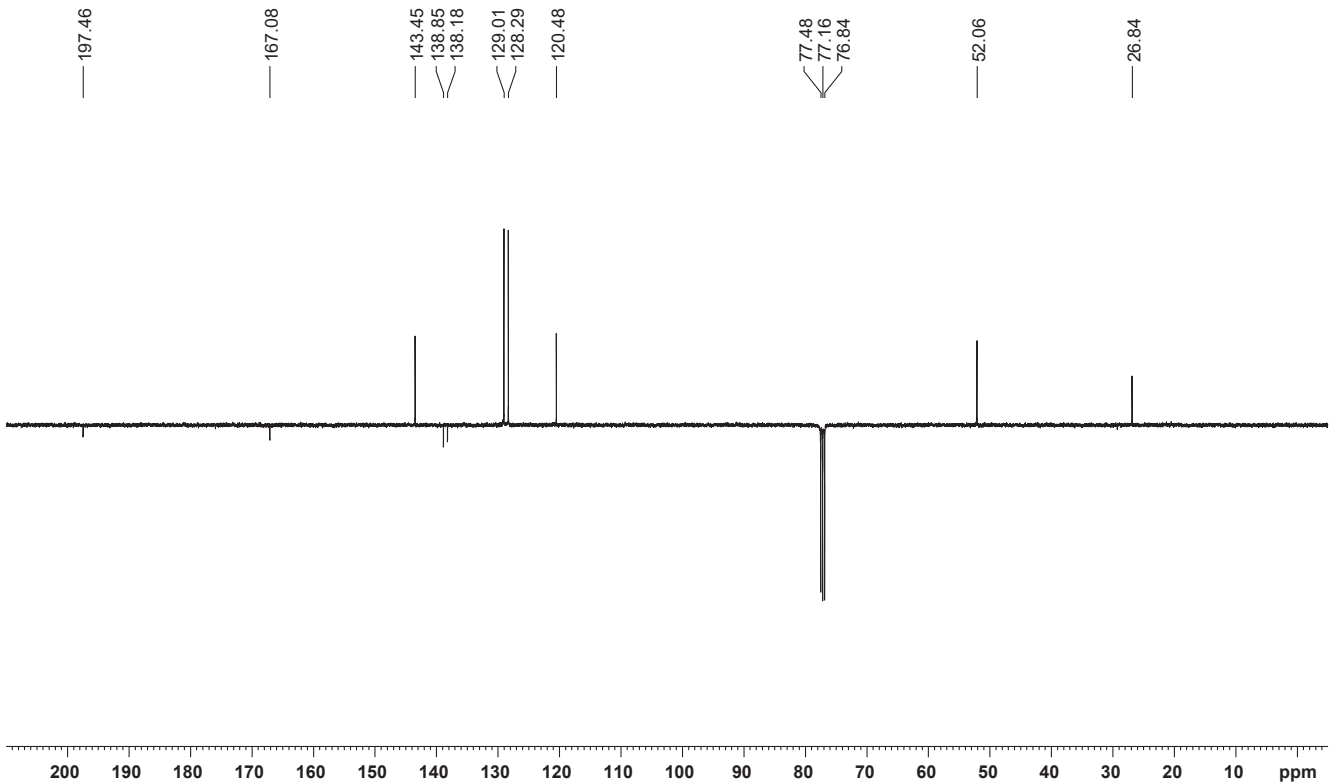

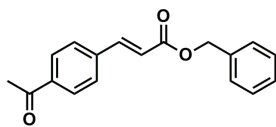

(E)-benzyl 3-(4-acetylphenyl)acrylate (**3cb**)

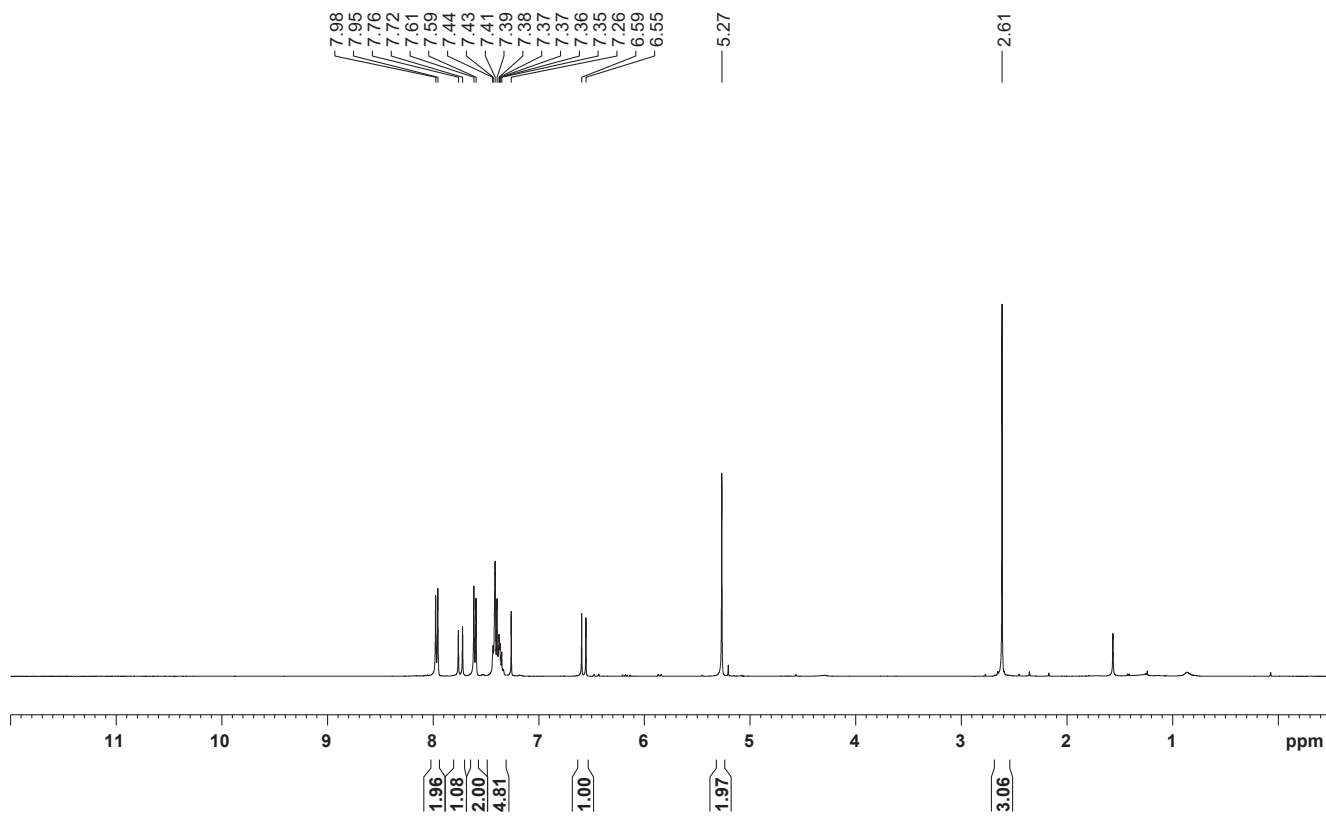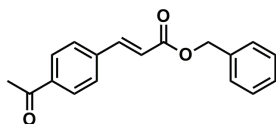

(E)-benzyl 3-(4-acetylphenyl)acrylate (**3cb**)

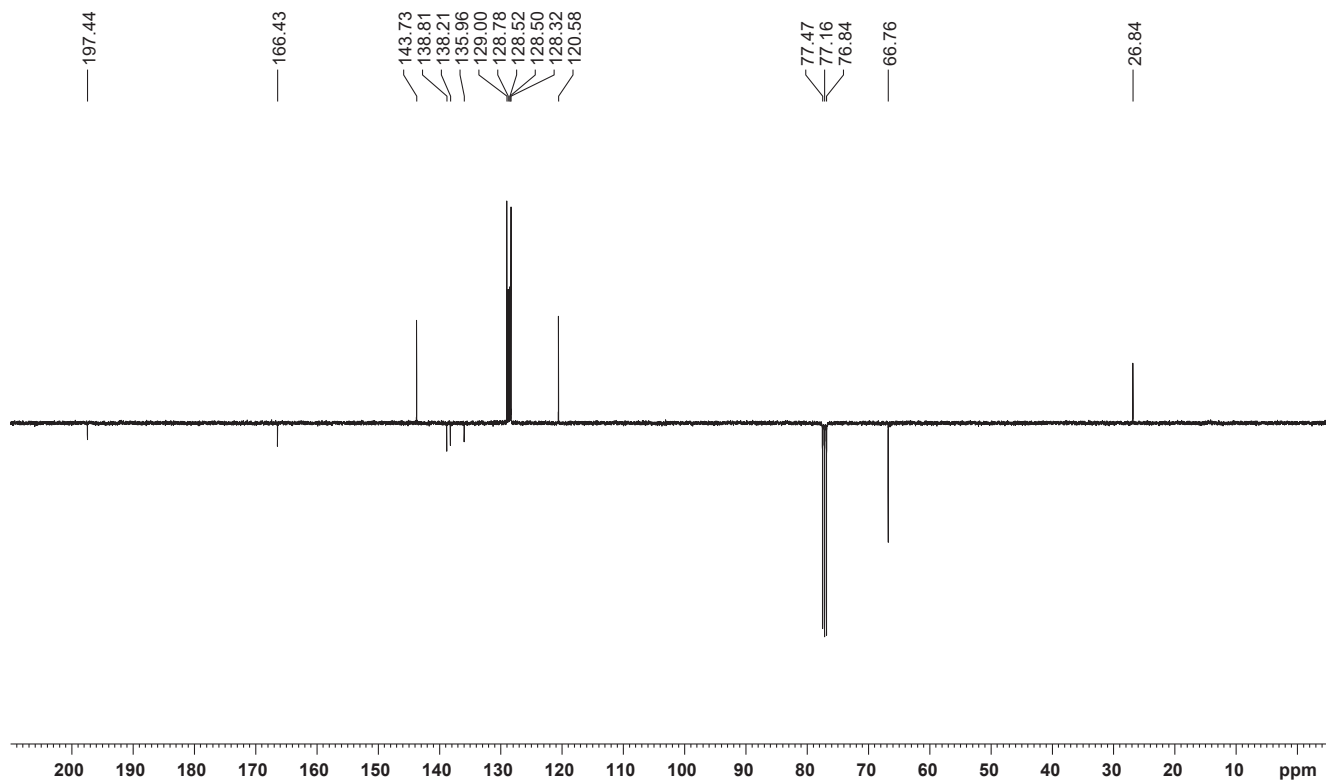

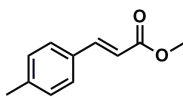

(E)-methyl 3-(p-tolyl)acrylate (**3da**)

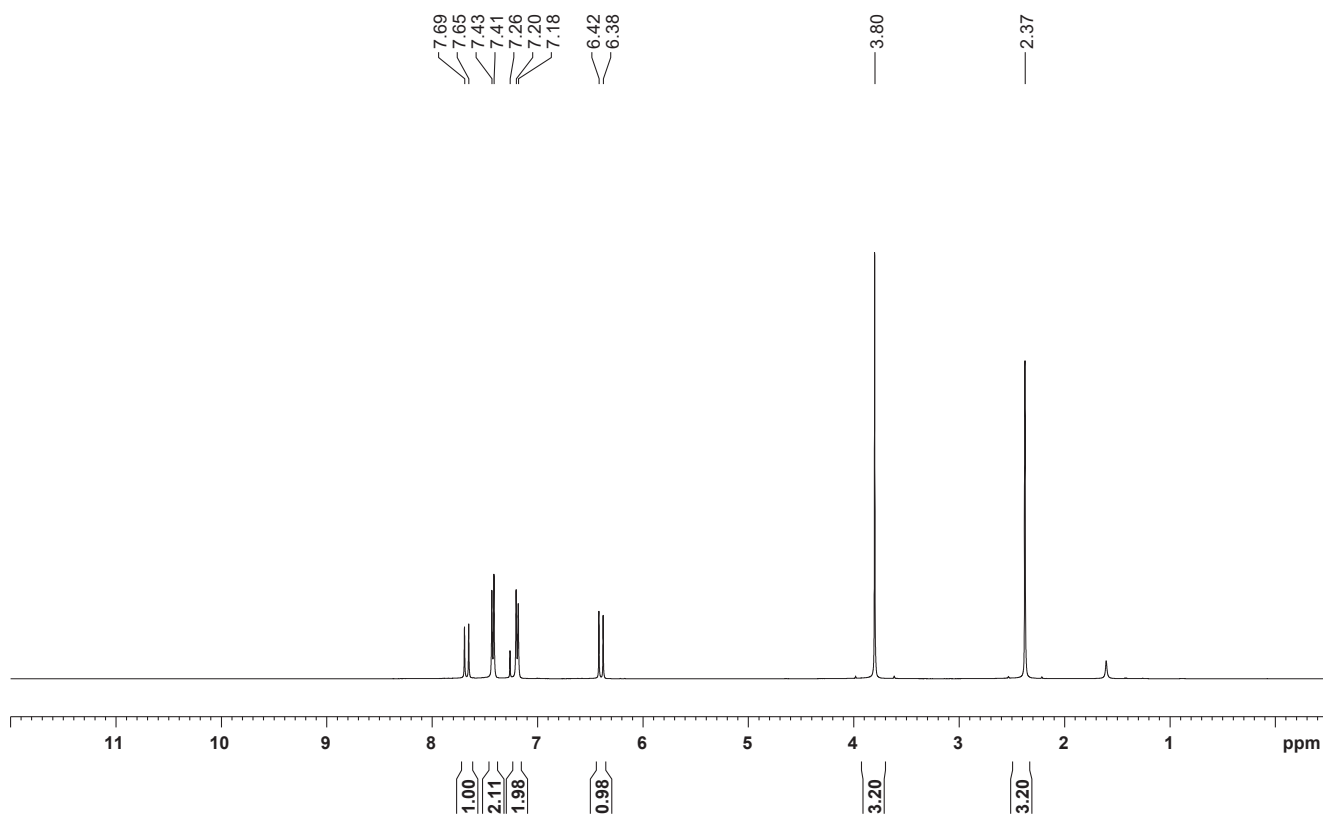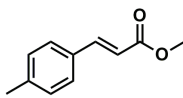

(E)-methyl 3-(p-tolyl)acrylate (**3da**)

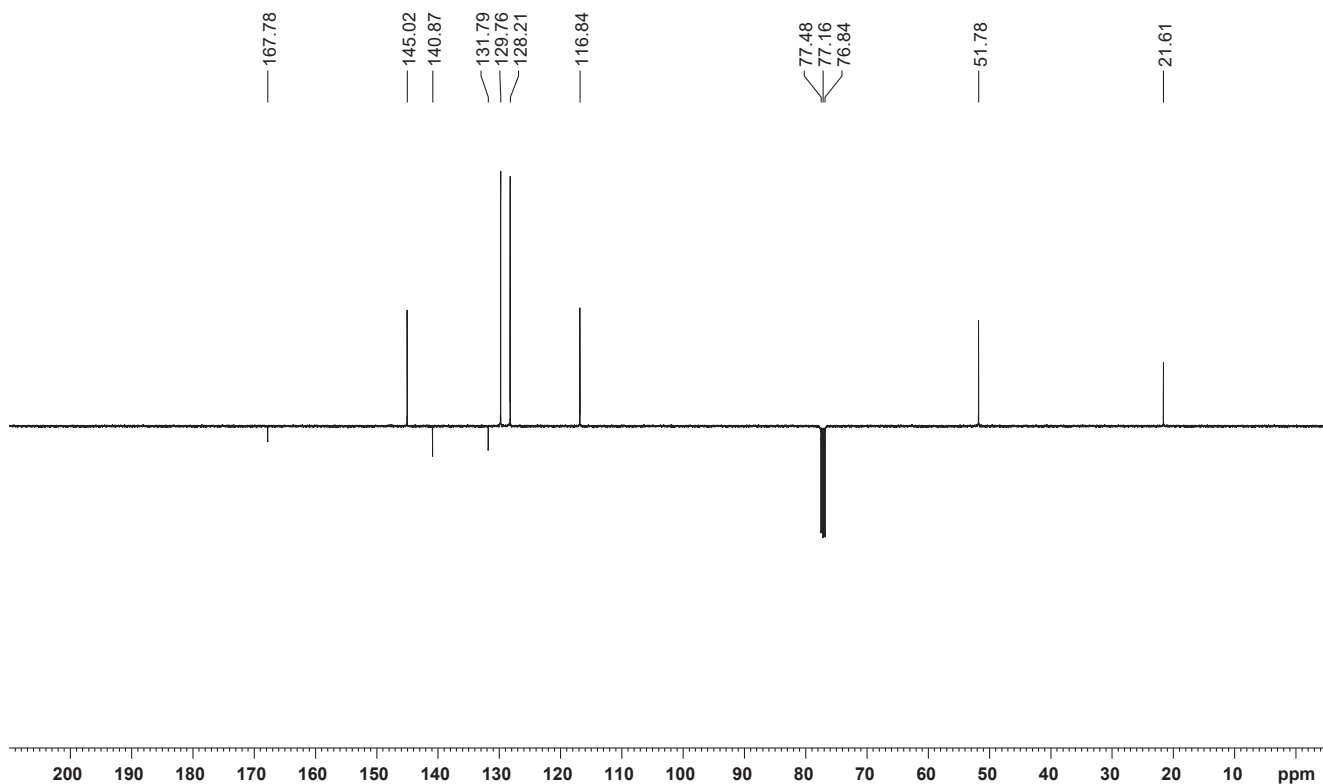



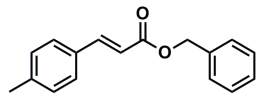

(E)-benzyl 3-(p-tolyl)acrylate (**3db**)

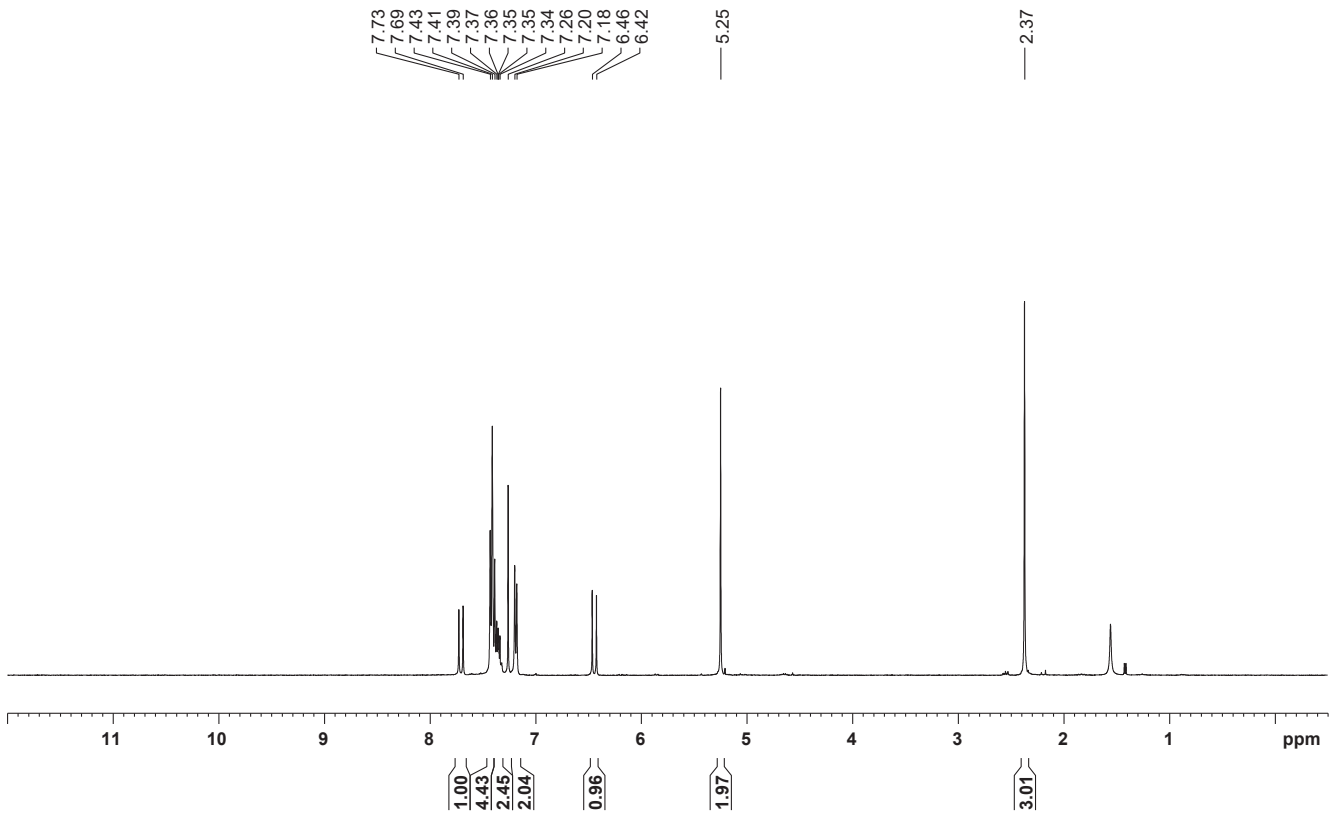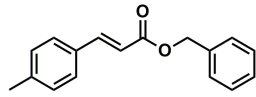

(E)-benzyl 3-(p-tolyl)acrylate (**3db**)

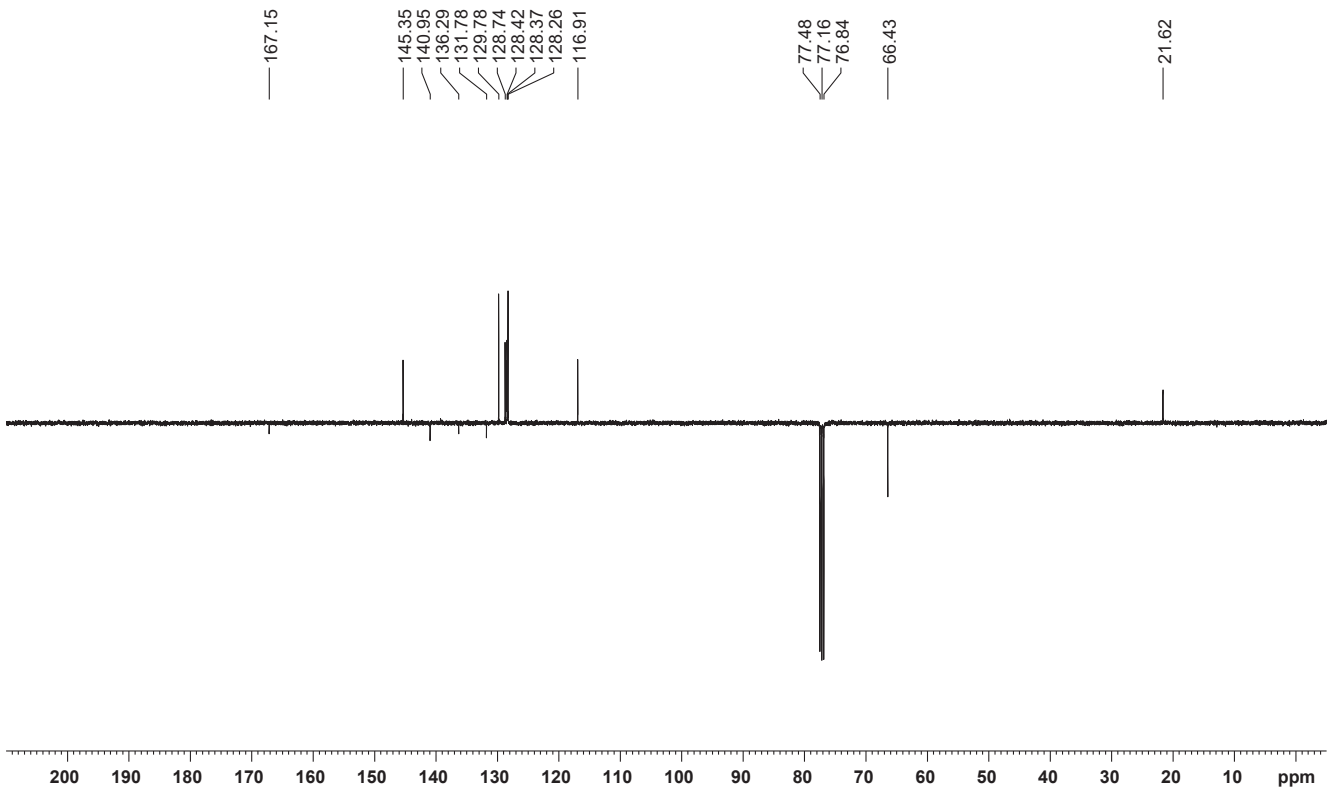

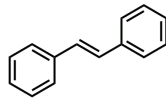

(E)-1,2-diphenylethene (**5a**)

7.55  
7.53  
7.40  
7.38  
7.36  
7.30  
7.28  
7.27  
7.26  
7.14

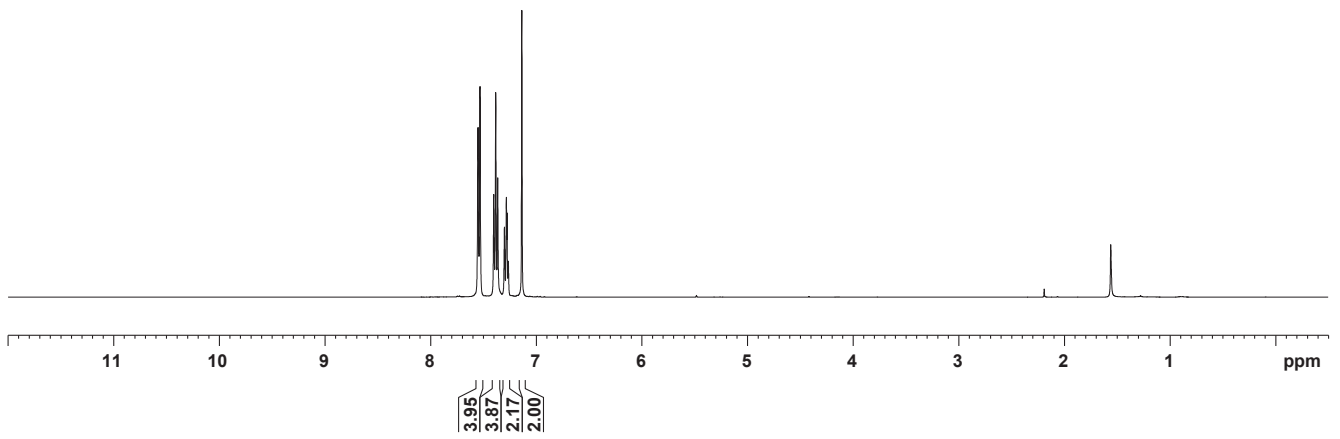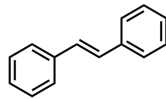

(E)-1,2-diphenylethene (**5a**)

137.47  
128.83  
127.77  
126.66

77.48  
77.16  
76.84

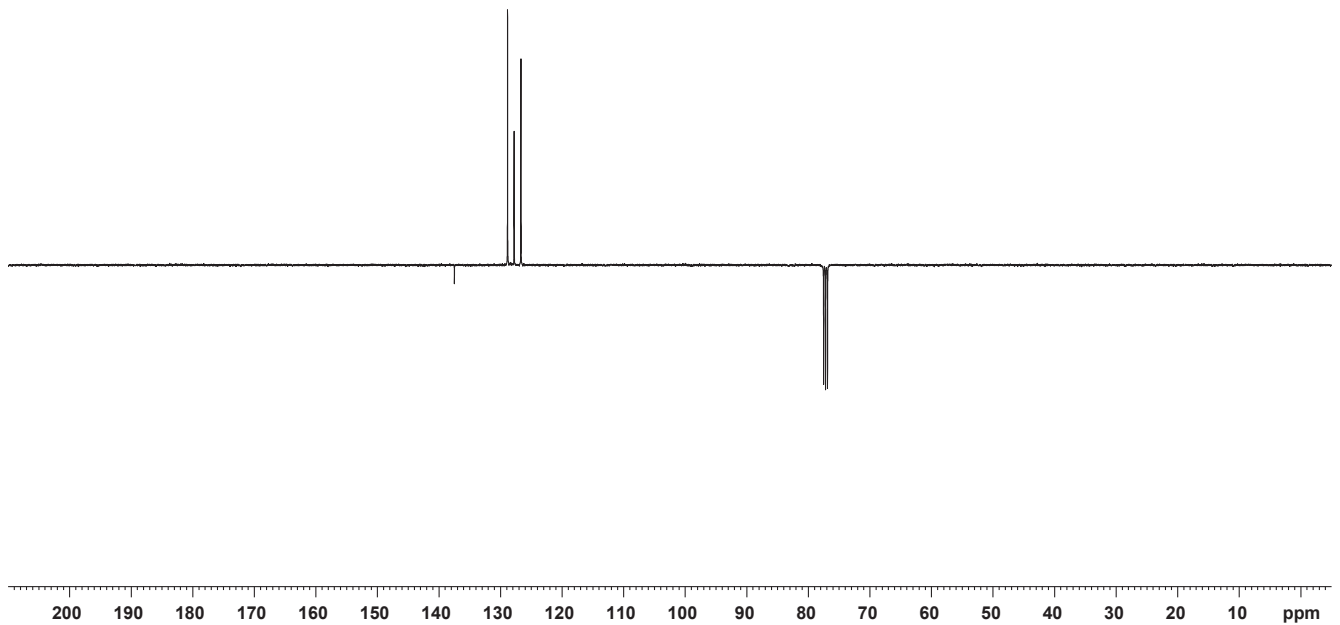

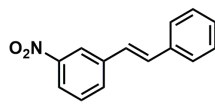

(E)-1-nitro-3-styrylbenzene (**5b**)

8.39  
8.13  
8.11  
7.83  
7.81  
7.58  
7.56  
7.55  
7.53  
7.44  
7.42  
7.40  
7.36  
7.35  
7.33  
7.28  
7.25  
7.18  
7.14

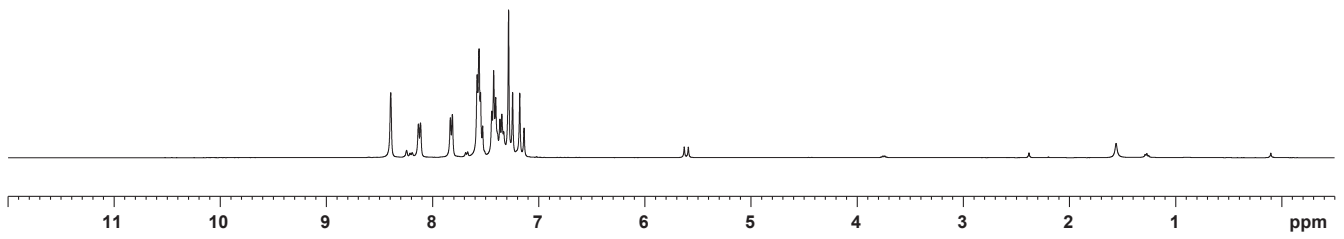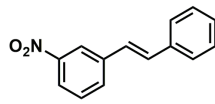

(E)-1-nitro-3-styrylbenzene (**5b**)

139.30  
136.40  
132.39  
131.90  
129.70  
129.00  
128.67  
126.97  
126.24  
122.16  
121.03  
116.63  
77.48  
77.16  
76.84

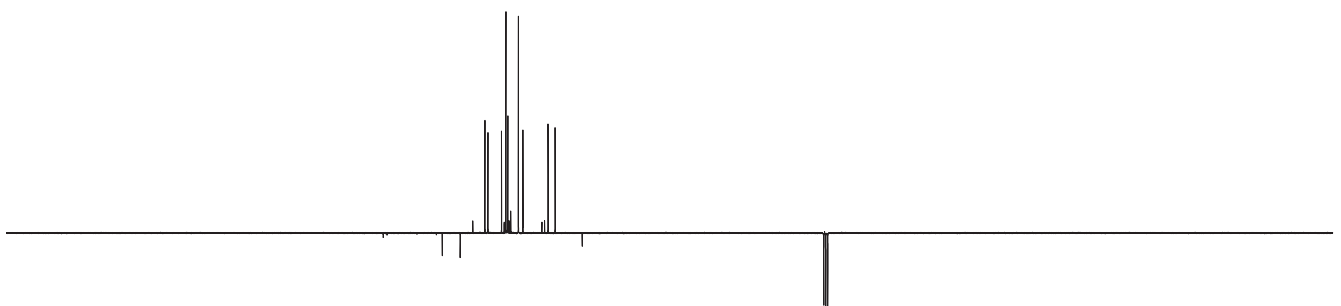

200 190 180 170 160 150 140 130 120 110 100 90 80 70 60 50 40 30 20 10 ppm

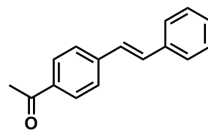

(E)-1-(4-styrylphenyl)ethanone (**5c**)

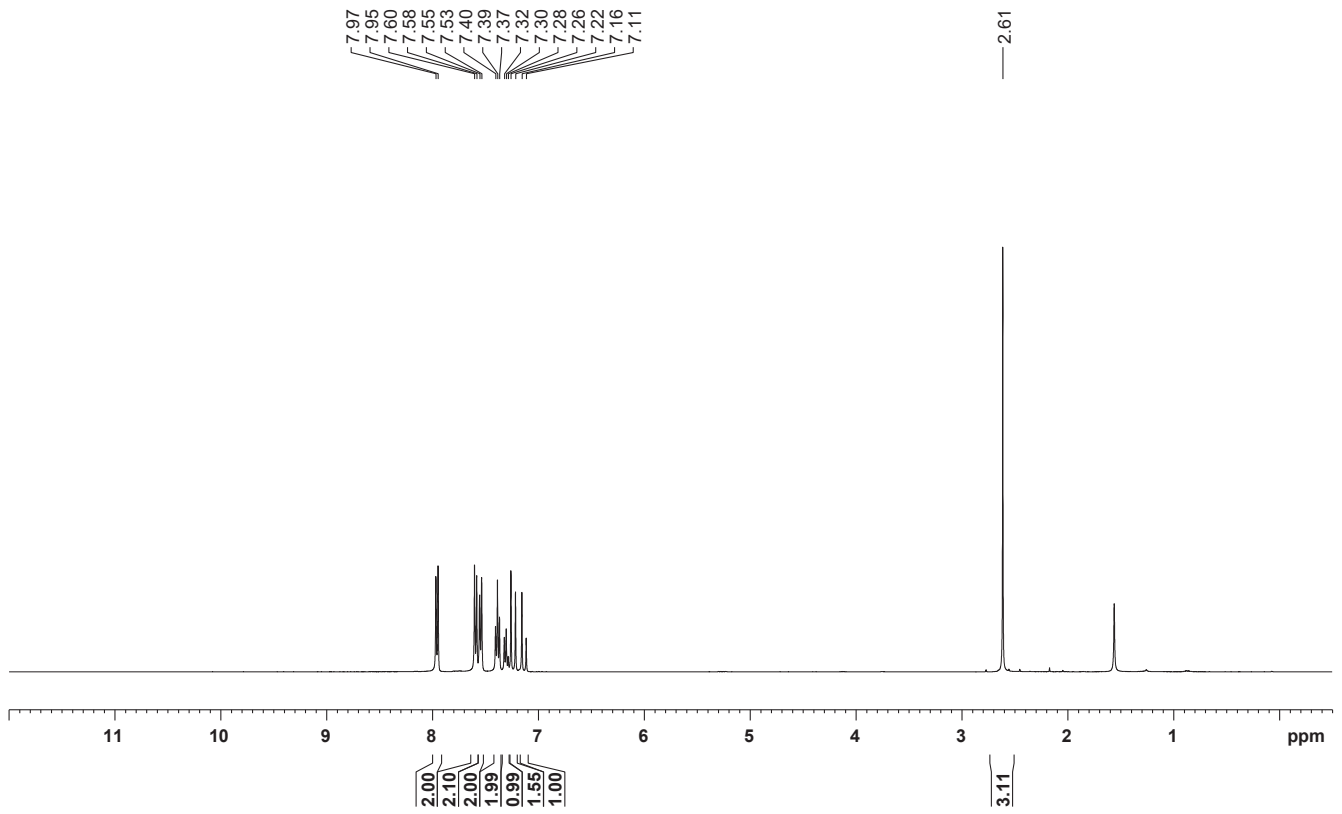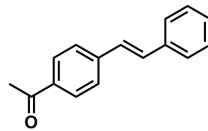

(E)-1-(4-styrylphenyl)ethanone (**5c**)

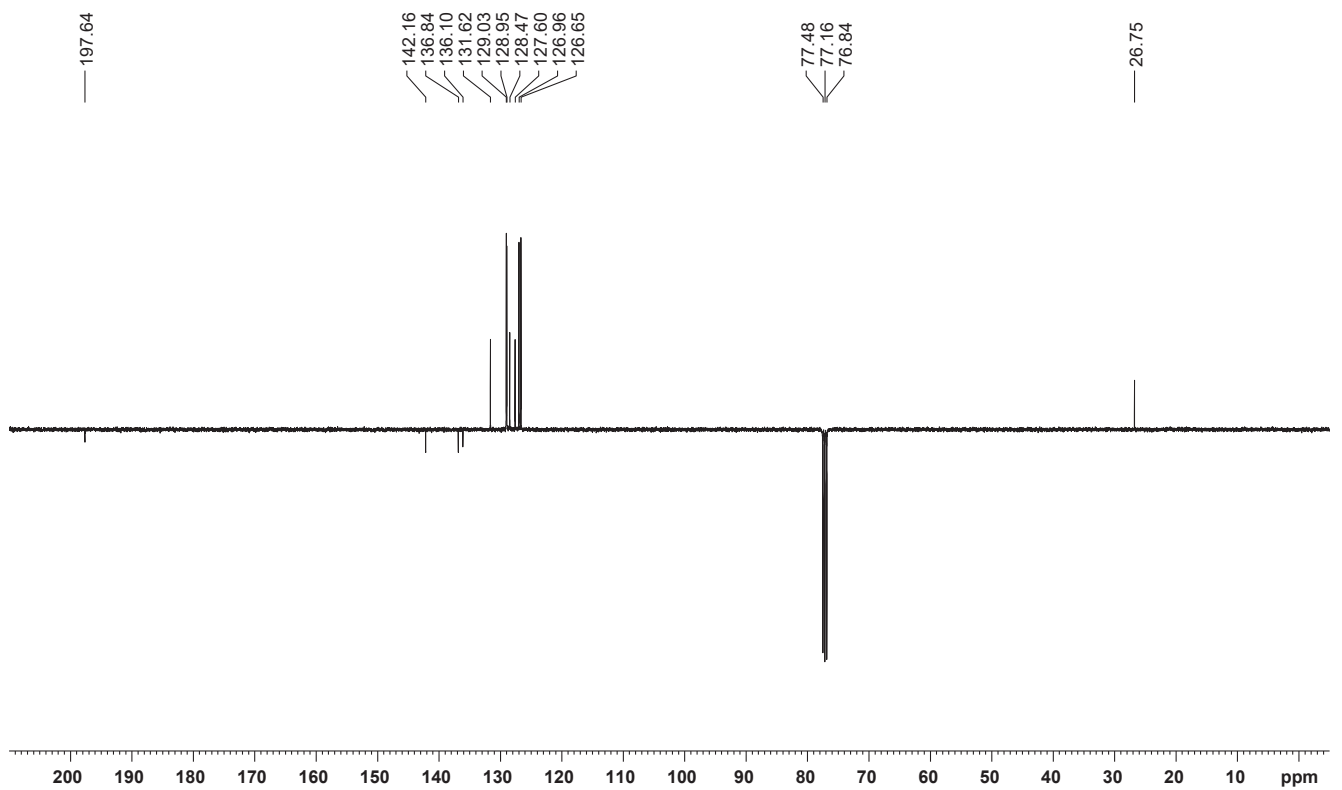

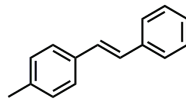

(E)-1-methyl-4-styrylbenzene (**5d**)

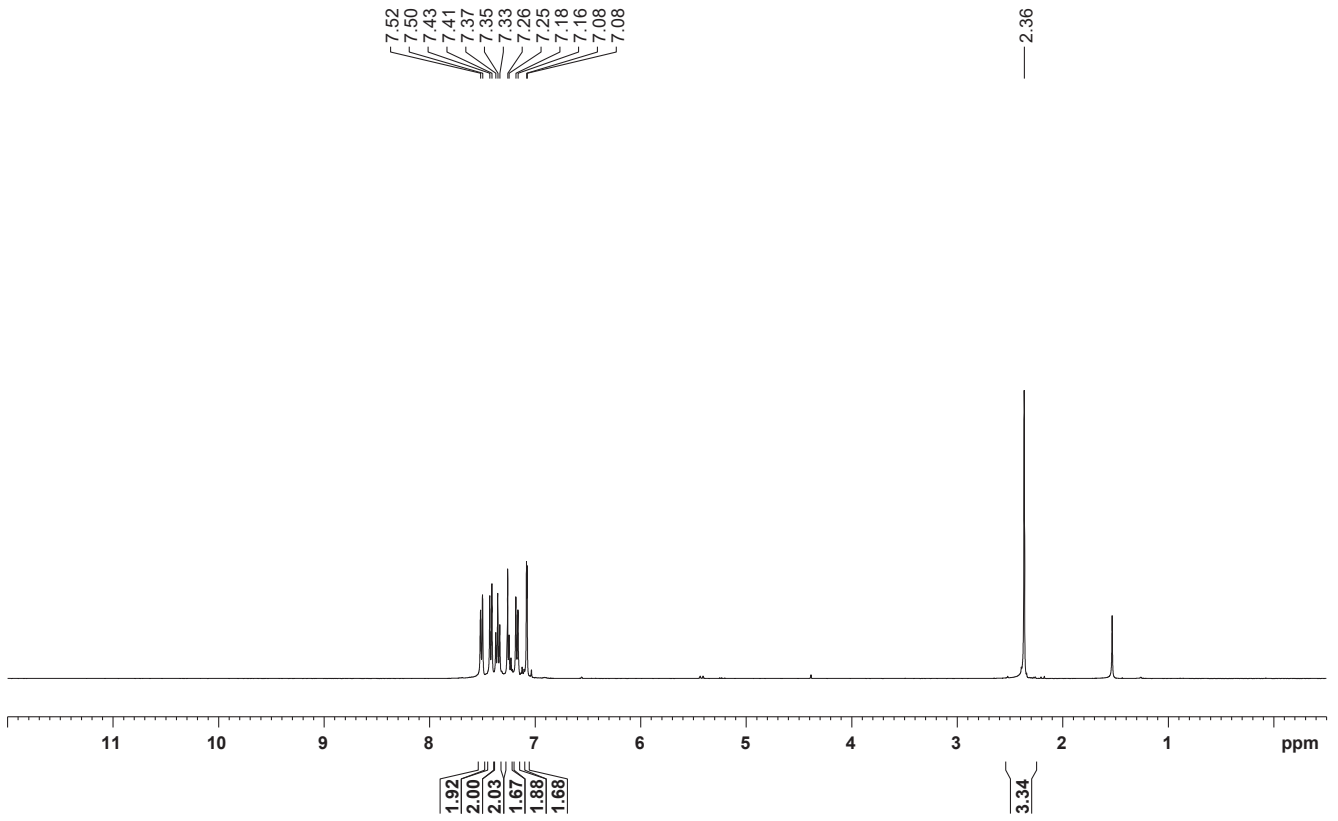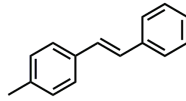

(E)-1-methyl-4-styrylbenzene (**5d**)

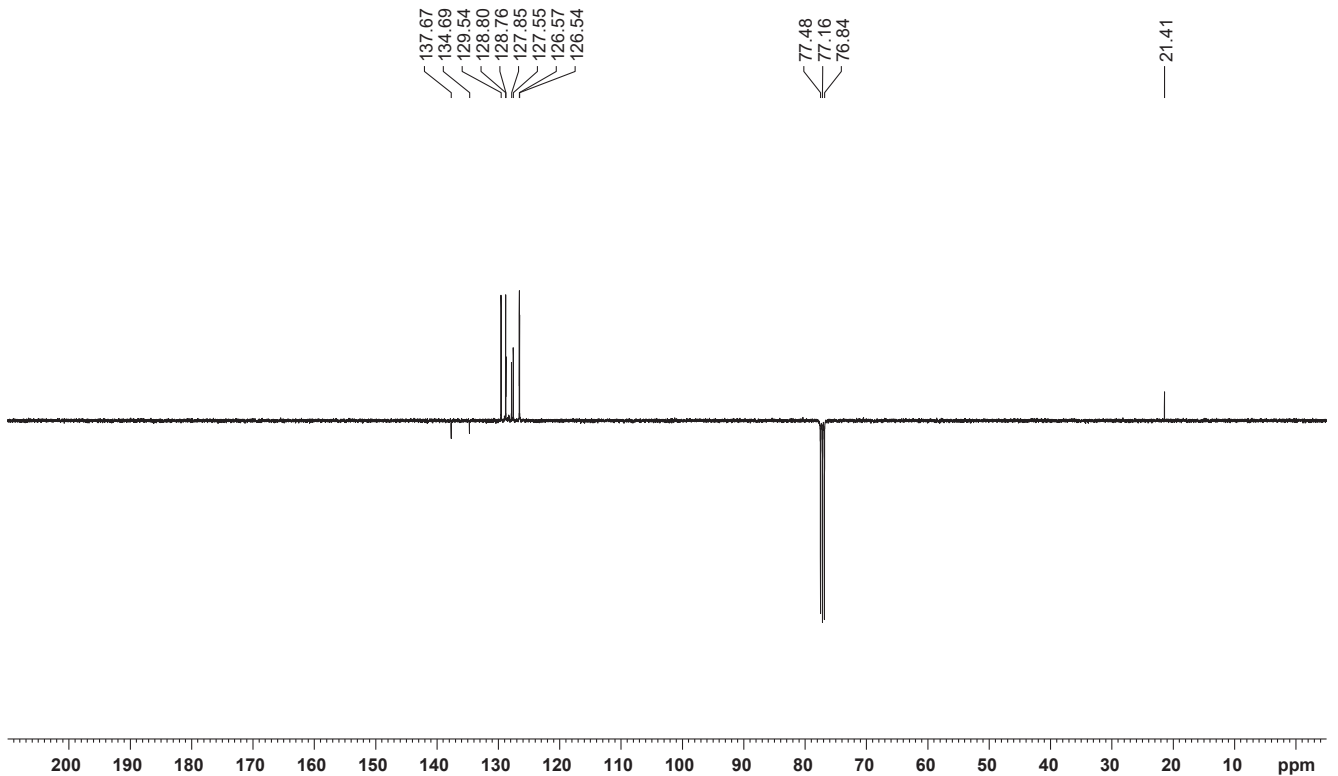

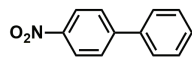

4-nitro-1,1'-biphenyl (**7ea**)

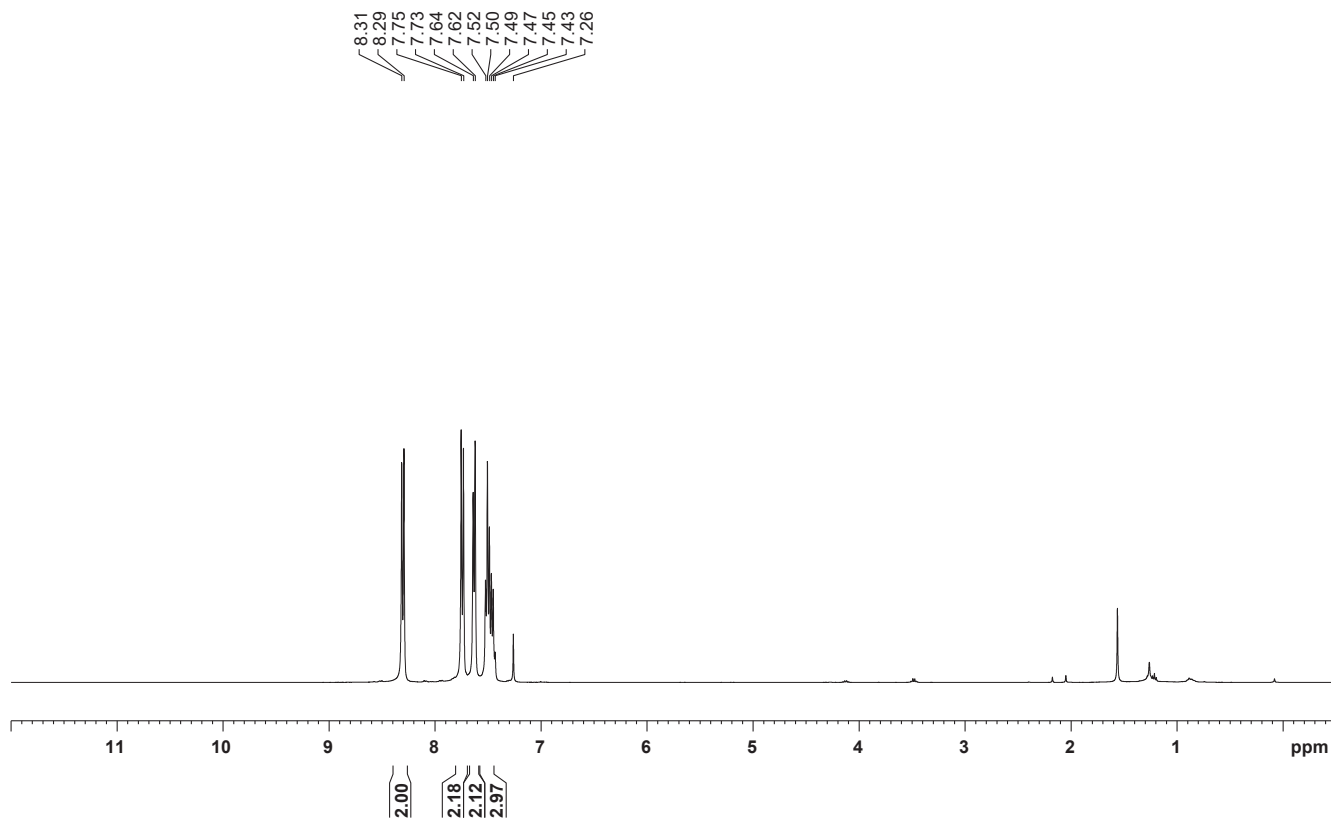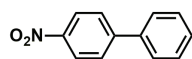

4-nitro-1,1'-biphenyl (**7ea**)

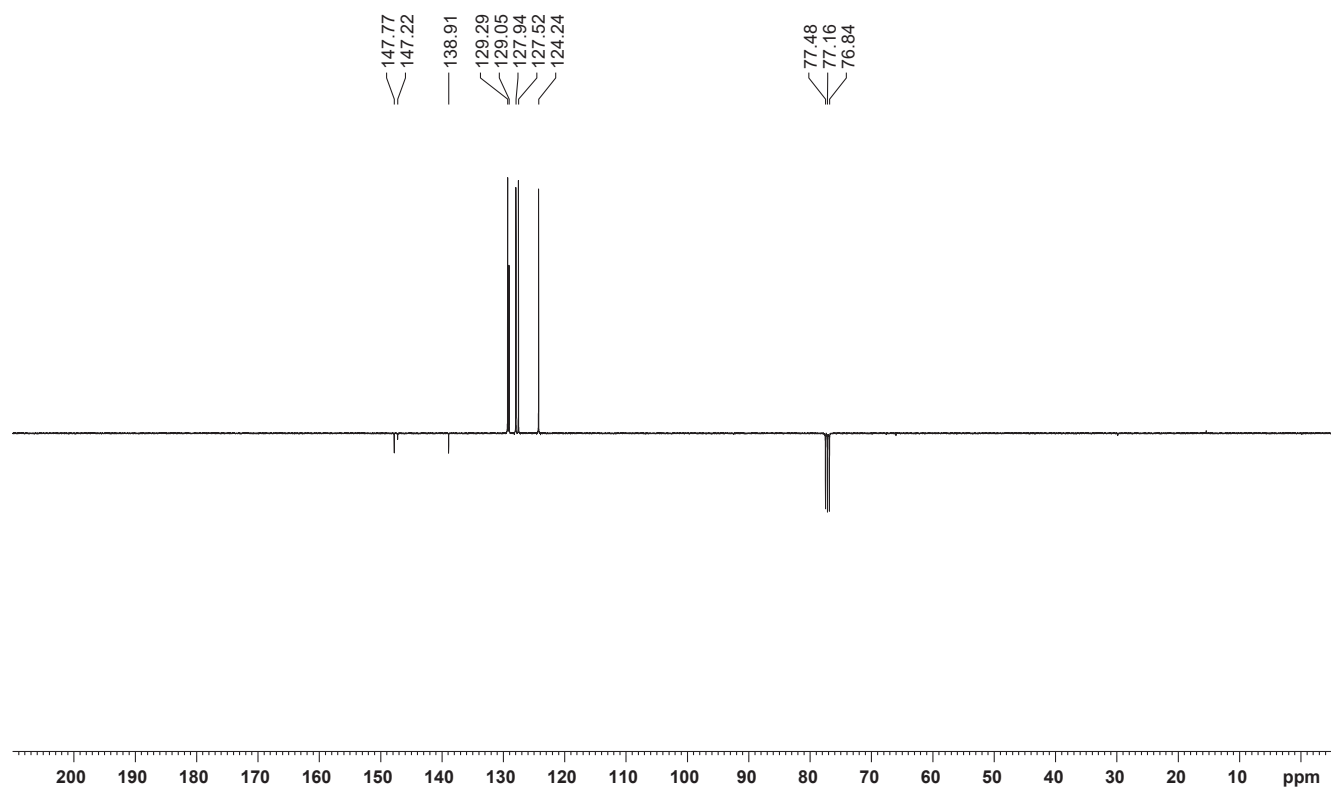

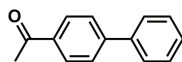

1-([1,1'-biphenyl]-4-yl)ethanone (**7fa**)

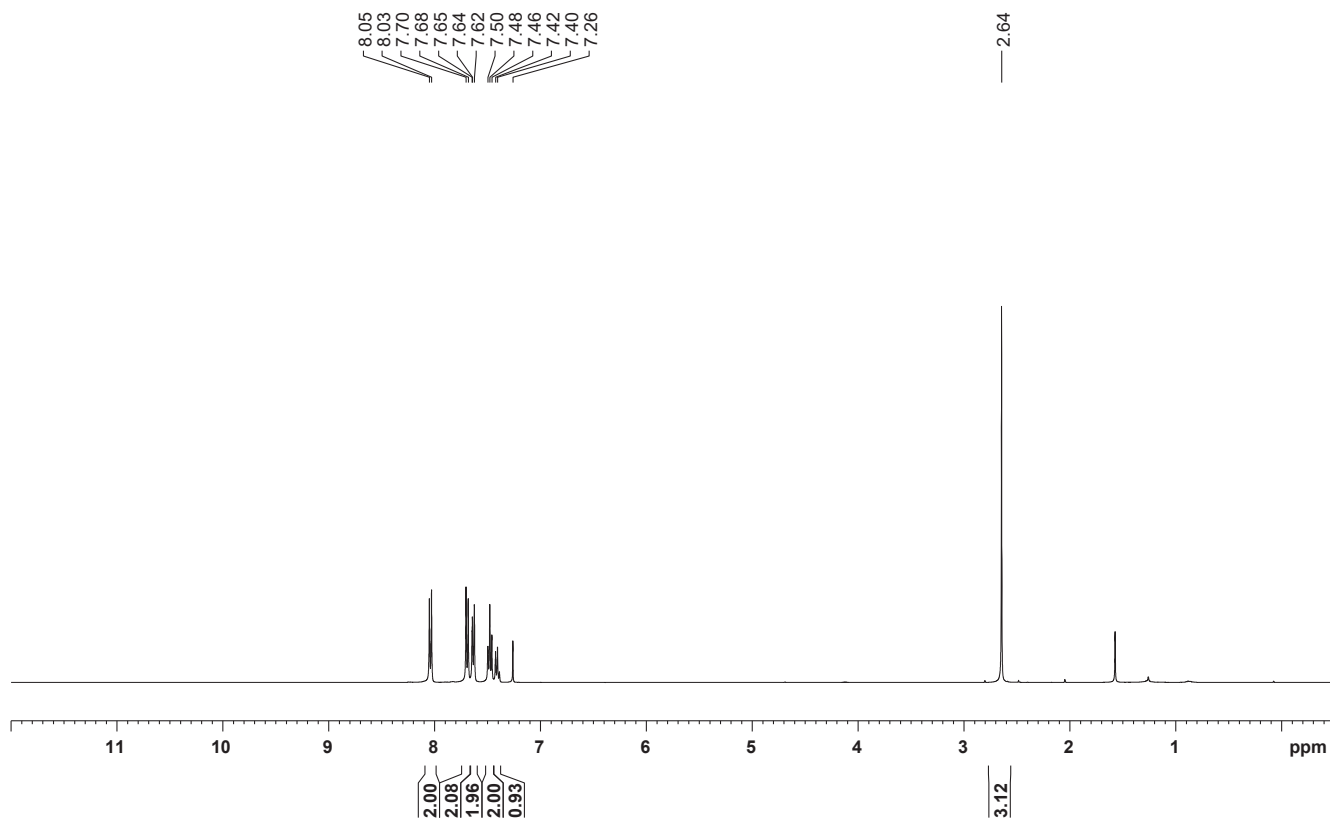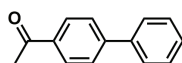

1-([1,1'-biphenyl]-4-yl)ethanone (**7fa**)

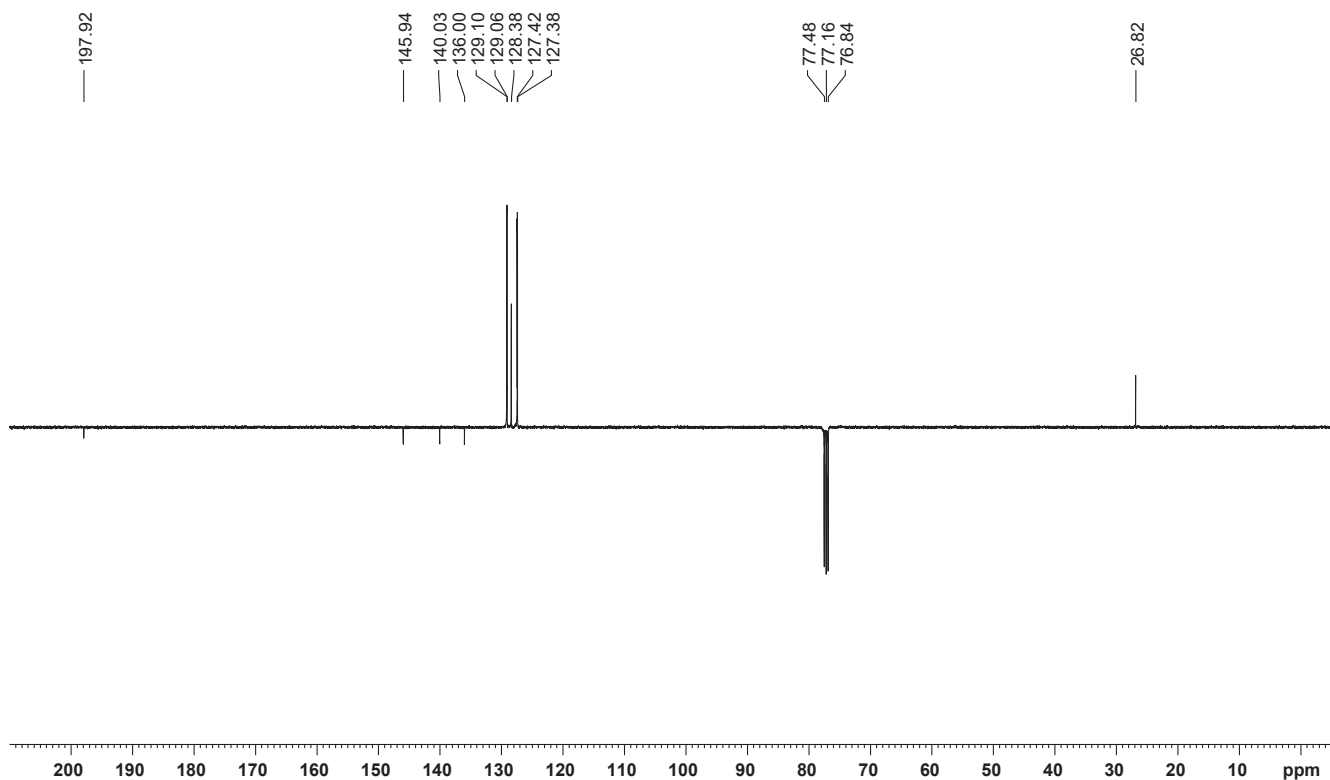

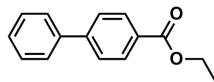

ethyl [1,1'-biphenyl]-4-carboxylate (7ga)

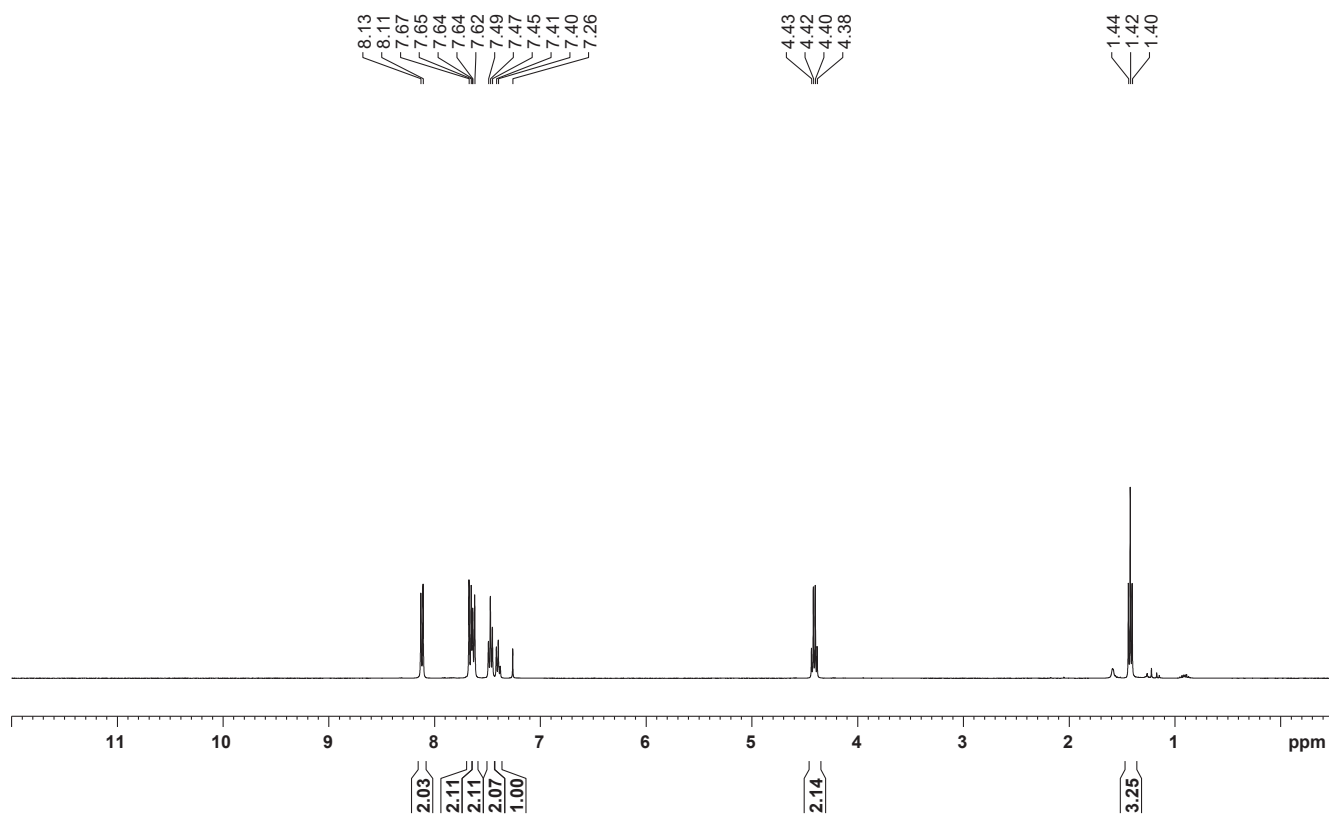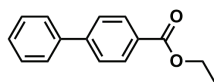

ethyl [1,1'-biphenyl]-4-carboxylate (7ga)

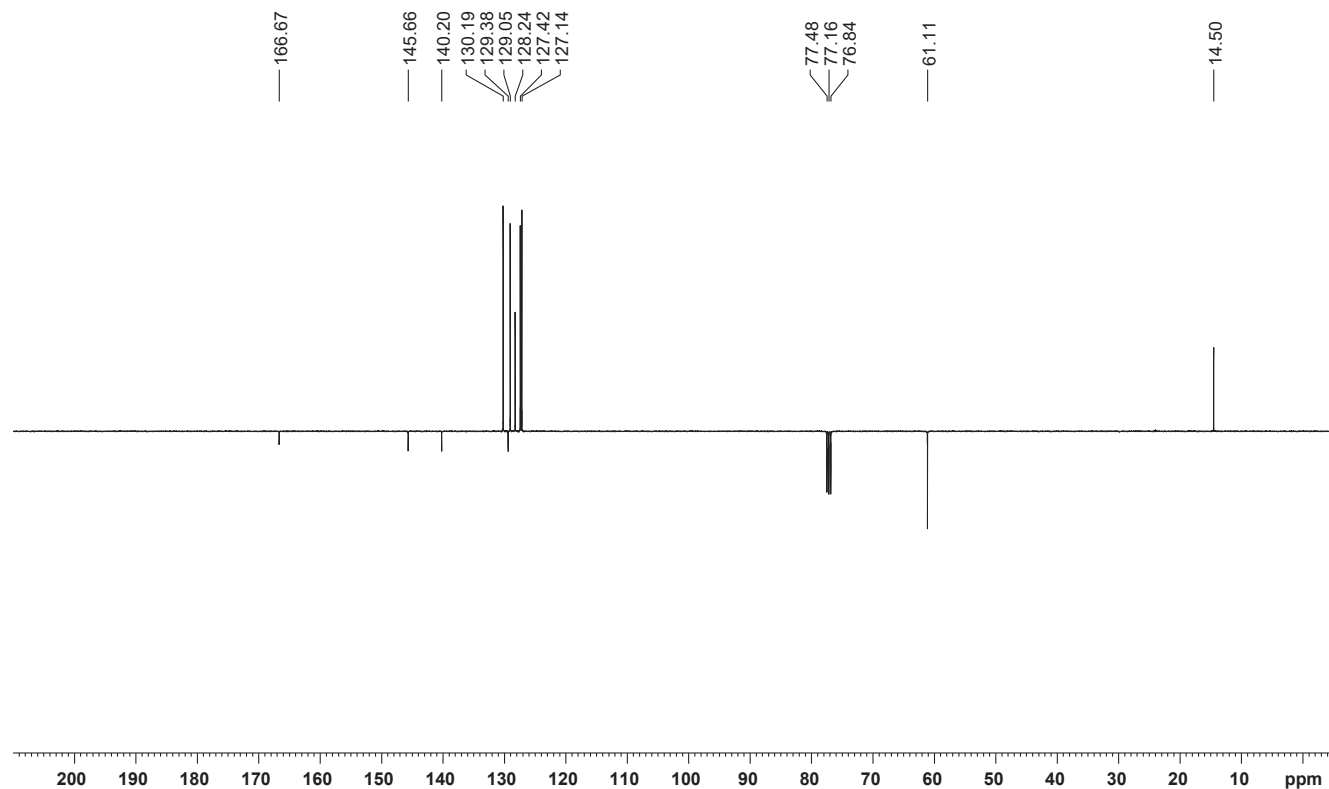



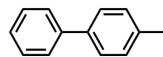

4-methyl-1,1'-biphenyl (**7da**)

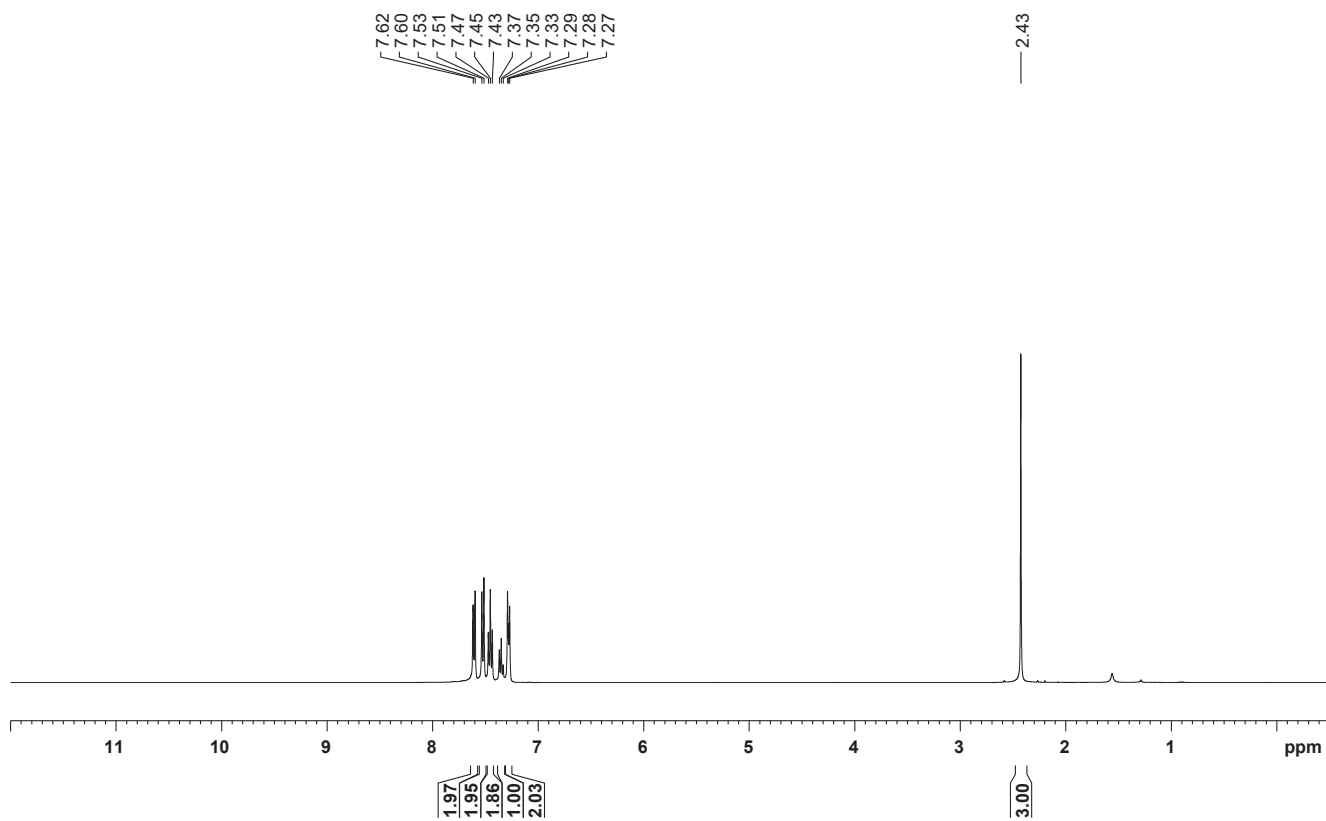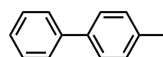

4-methyl-1,1'-biphenyl (**7da**)

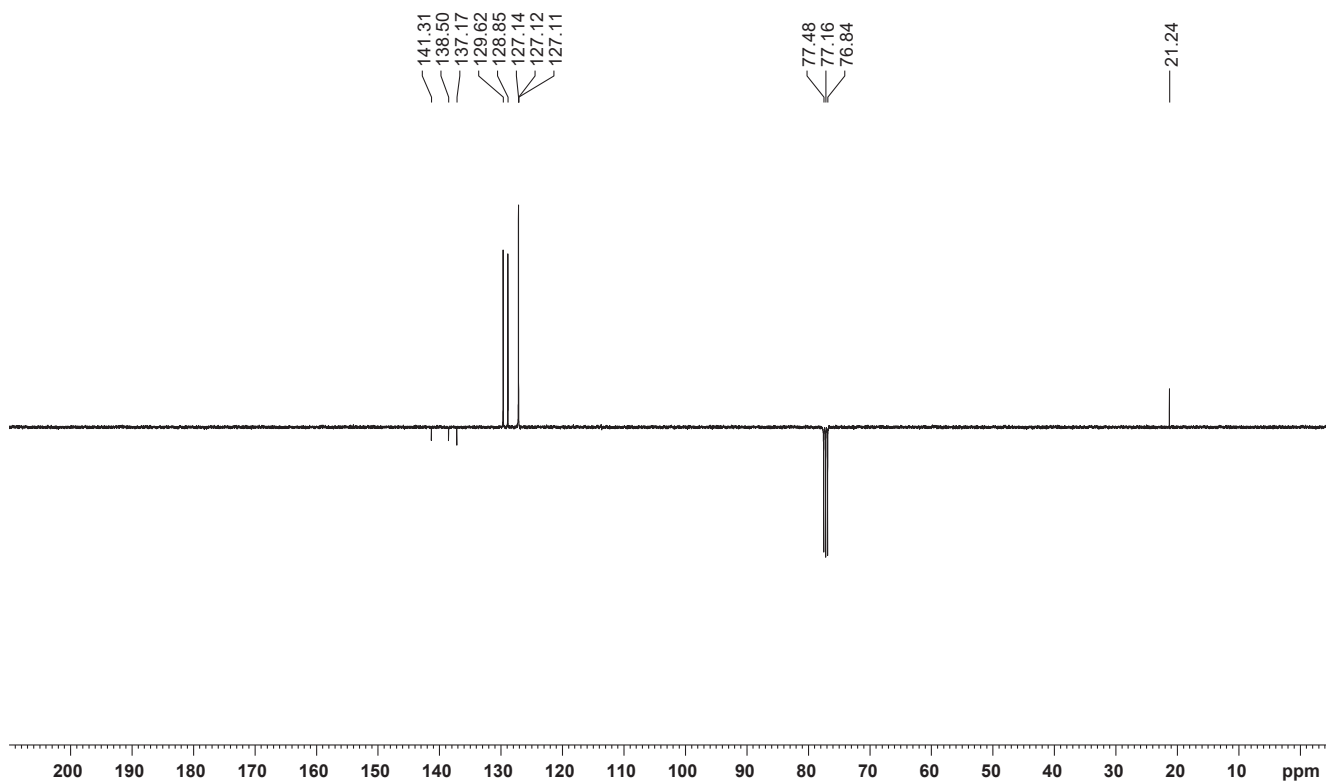

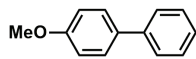

4-methoxy-1,1'-biphenyl (**7ha**)

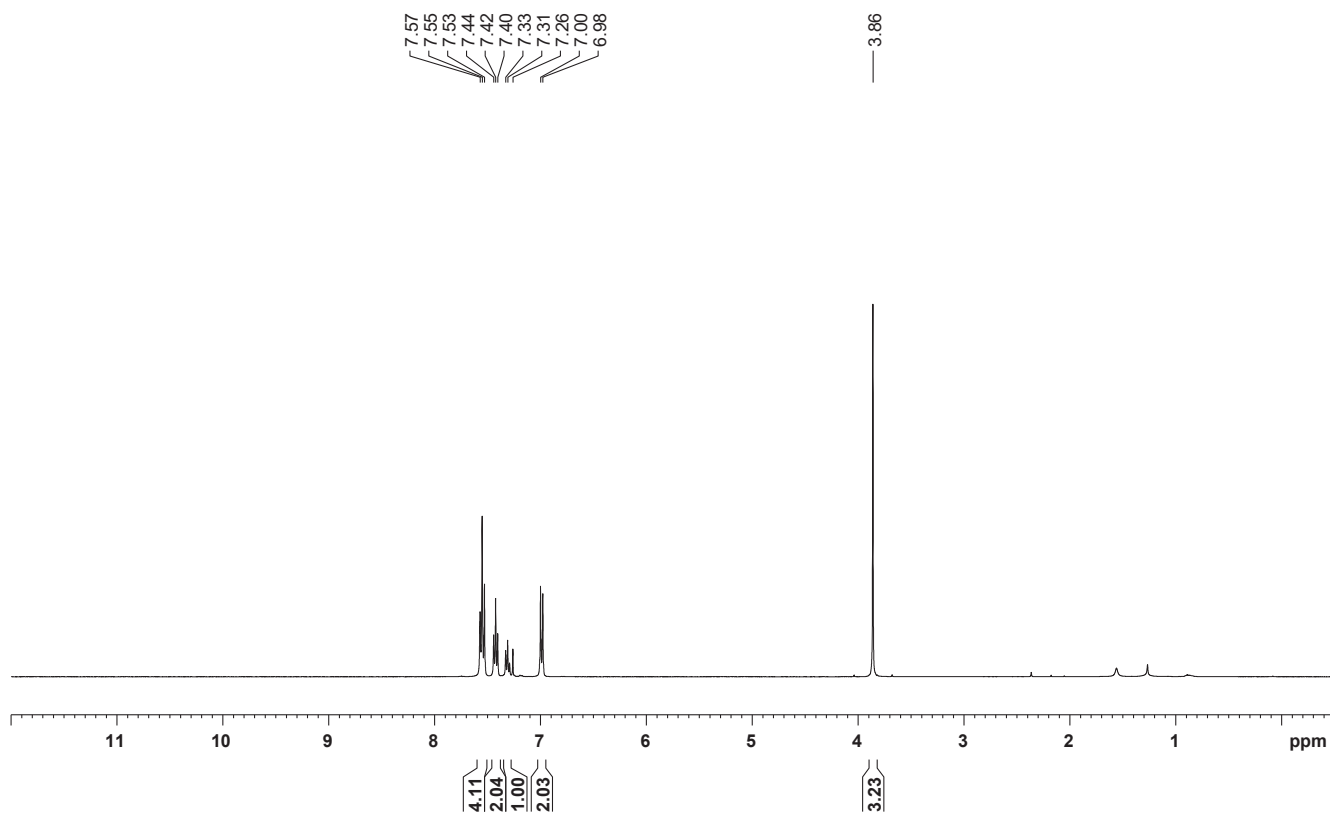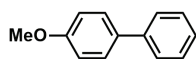

4-methoxy-1,1'-biphenyl (**7ha**)

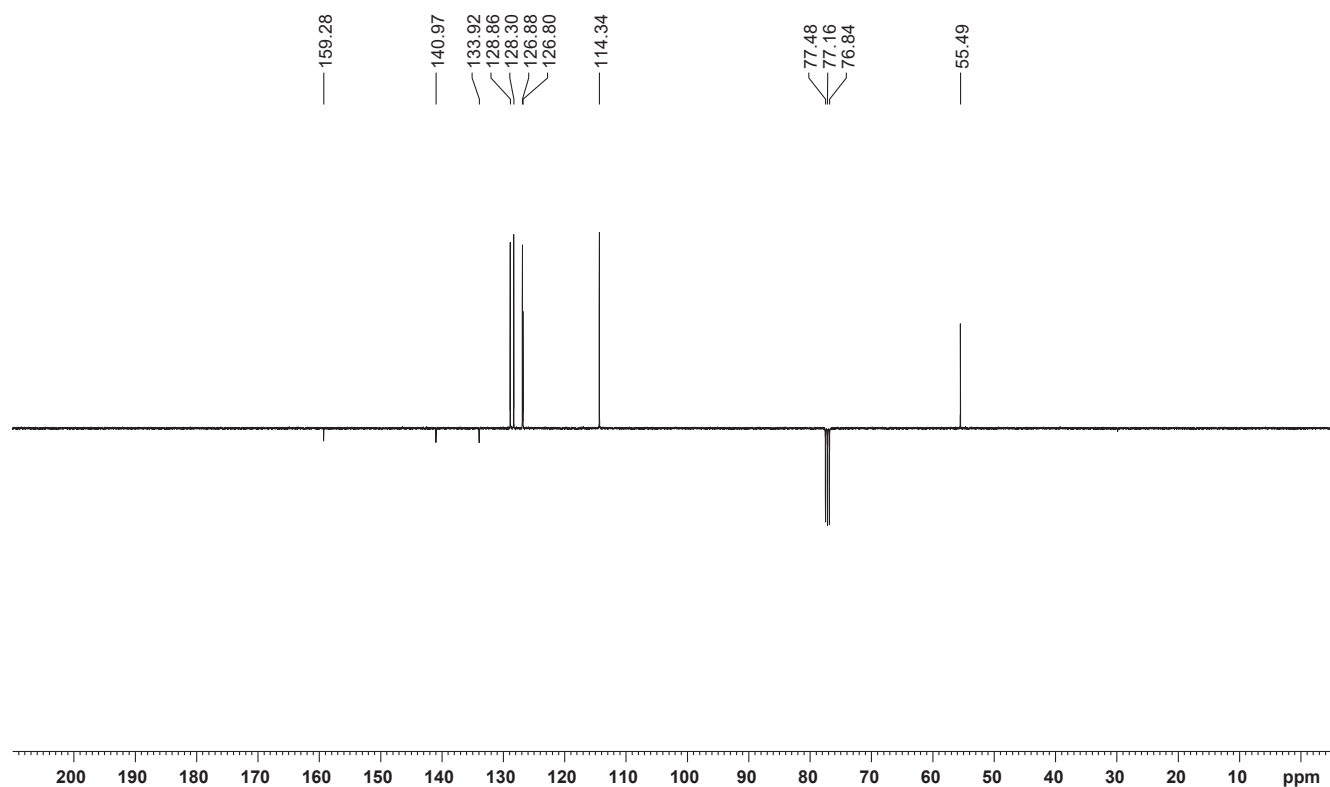

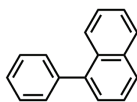

1-phenylnaphthalene (7ia)

7.92  
7.90  
7.88  
7.86  
7.55  
7.53  
7.51  
7.50  
7.48  
7.46  
7.45  
7.44  
7.44  
7.43  
7.43  
7.42  
7.41  
7.26

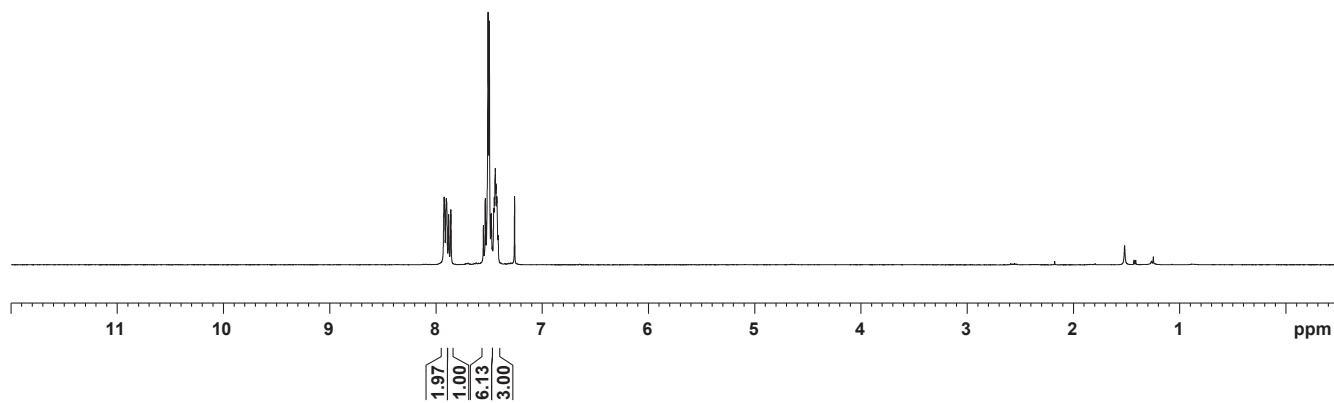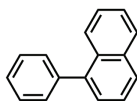

1-phenylnaphthalene (7ia)

140.90  
140.40  
133.93  
131.76  
130.22  
128.39  
127.77  
127.37  
127.06  
126.17  
126.15  
125.90  
125.52  
77.48  
77.16  
76.84

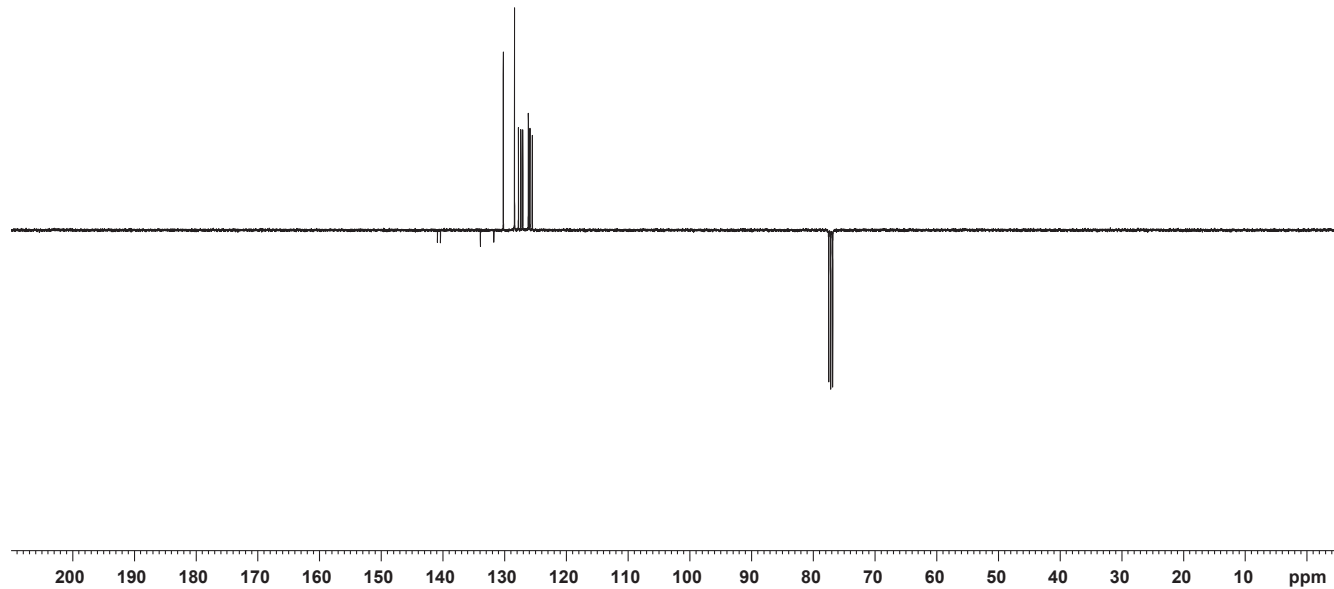

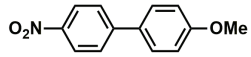

4-methoxy-4'-nitro-1,1'-biphenyl (**7eb**)

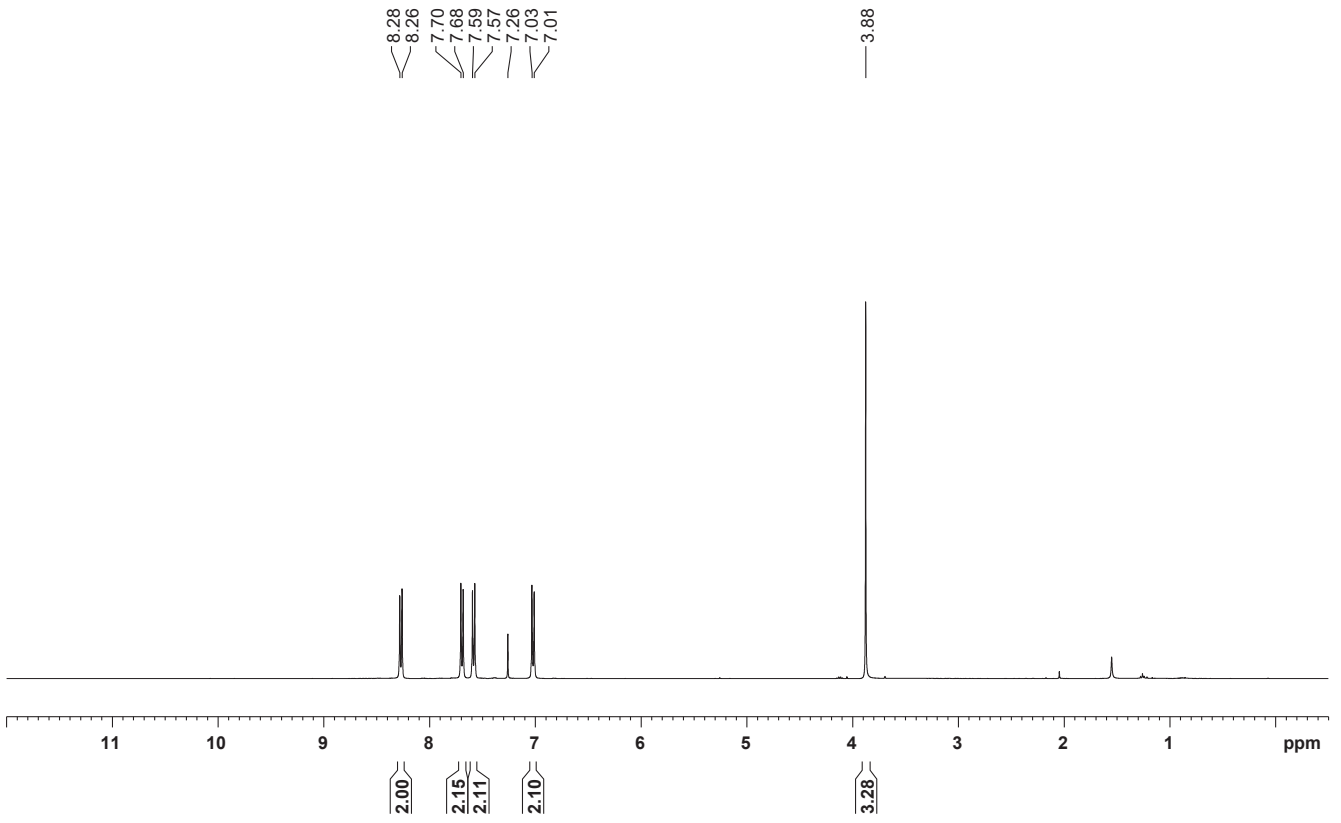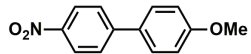

4-methoxy-4'-nitro-1,1'-biphenyl (**7eb**)

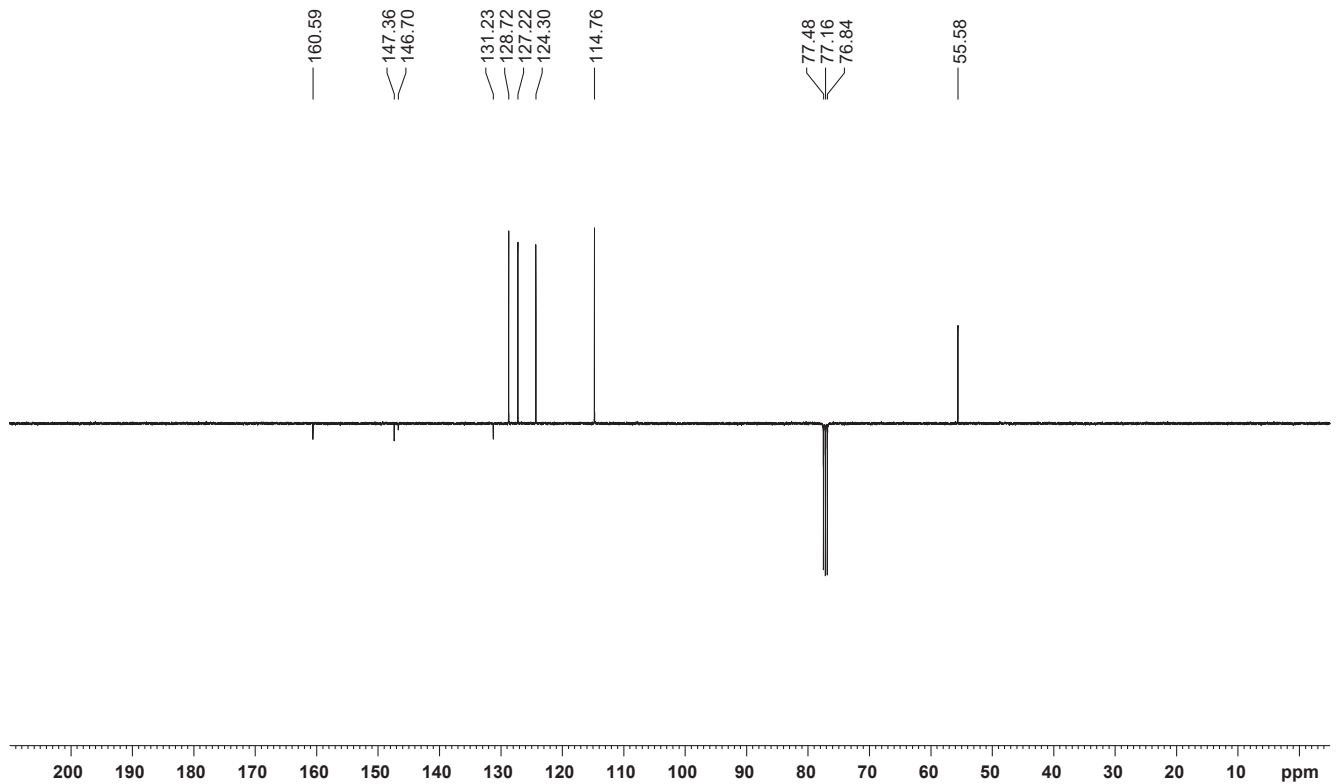

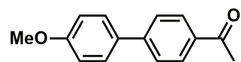

1-(4'-methoxy-[1,1'-biphenyl]-4-yl)ethanone (**7fb**)

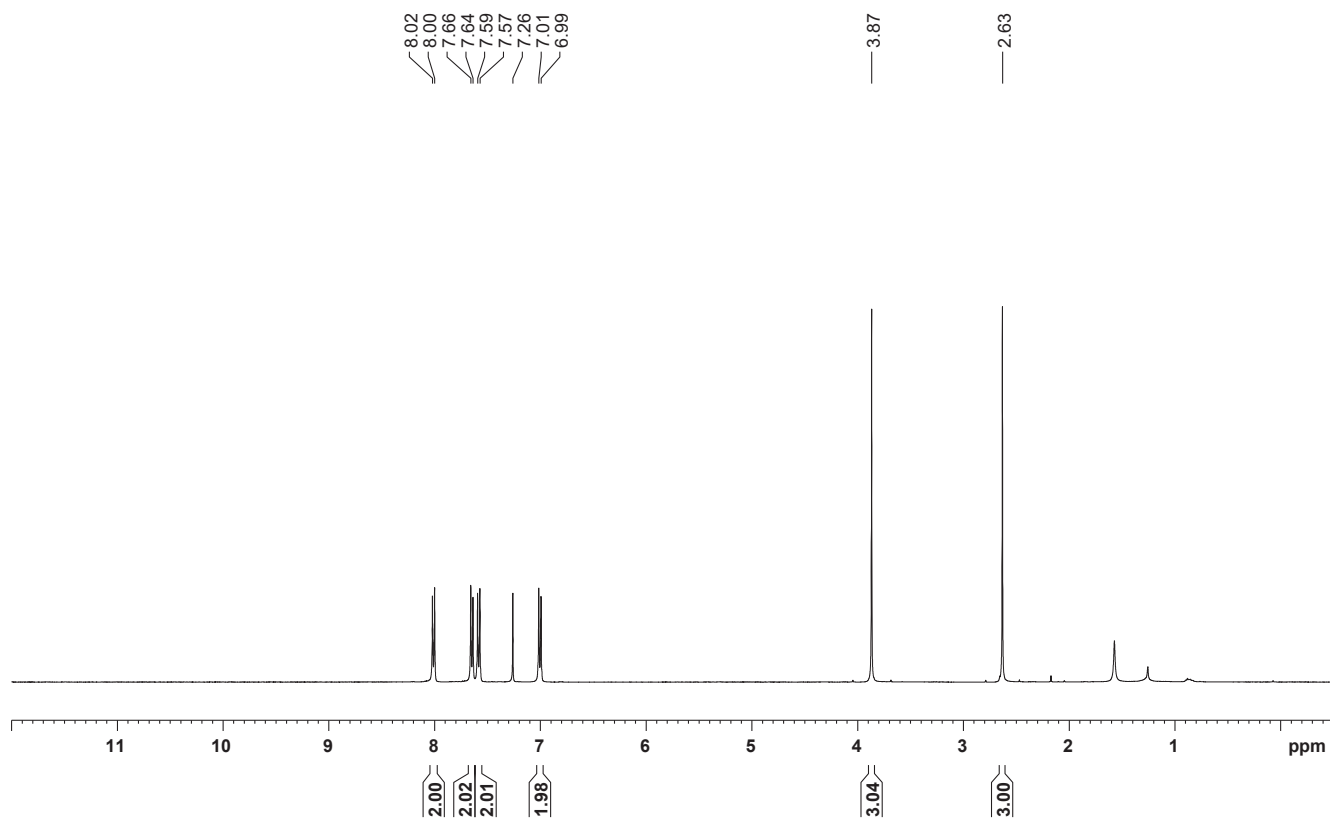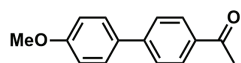

1-(4'-methoxy-[1,1'-biphenyl]-4-yl)ethanone (**7fb**)

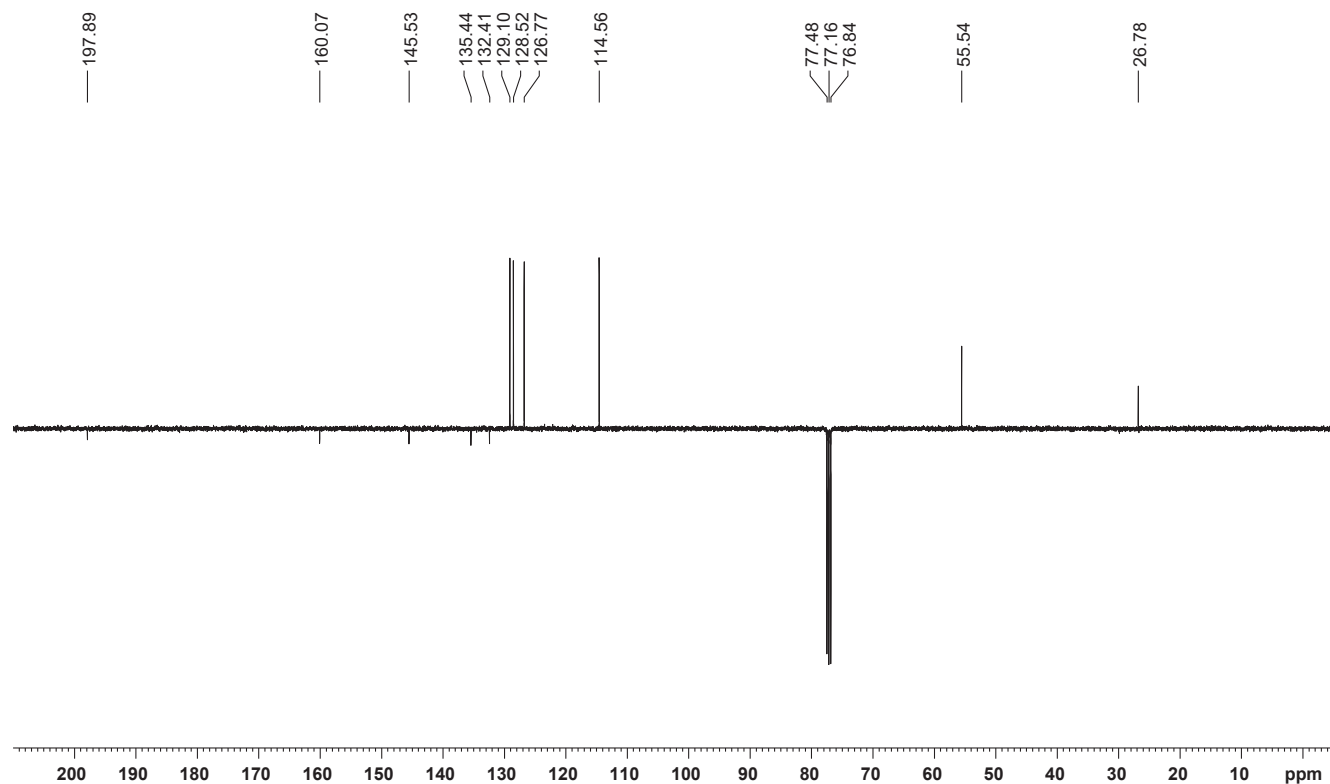

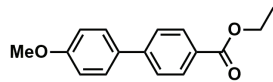

ethyl 4'-methoxy-[1,1'-biphenyl]-4-carboxylate (**7gb**)

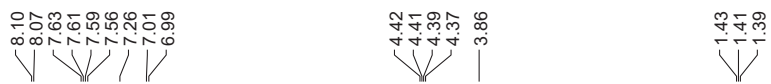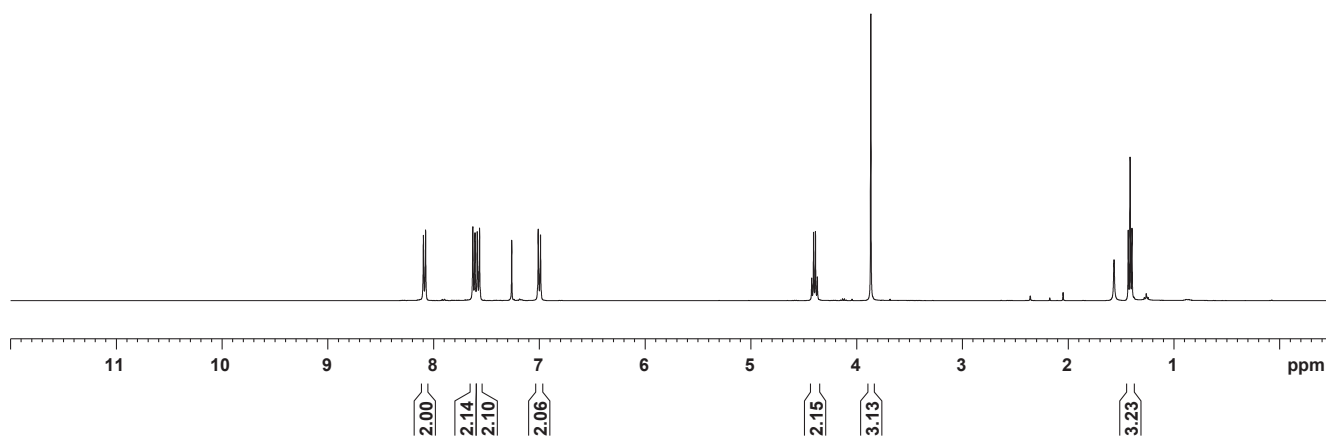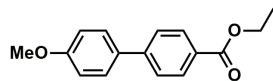

ethyl 4'-methoxy-[1,1'-biphenyl]-4-carboxylate (**7gb**)

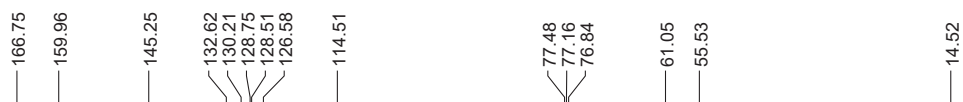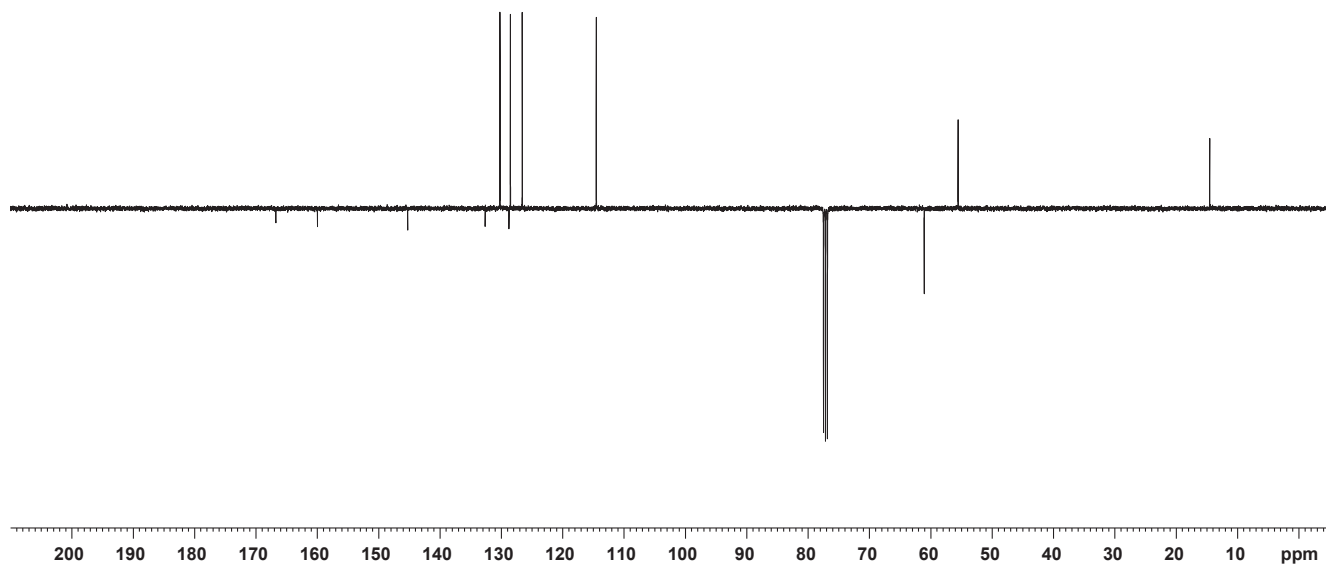

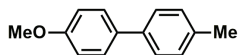

4-methoxy-4'-methyl-1,1'-biphenyl (7db)

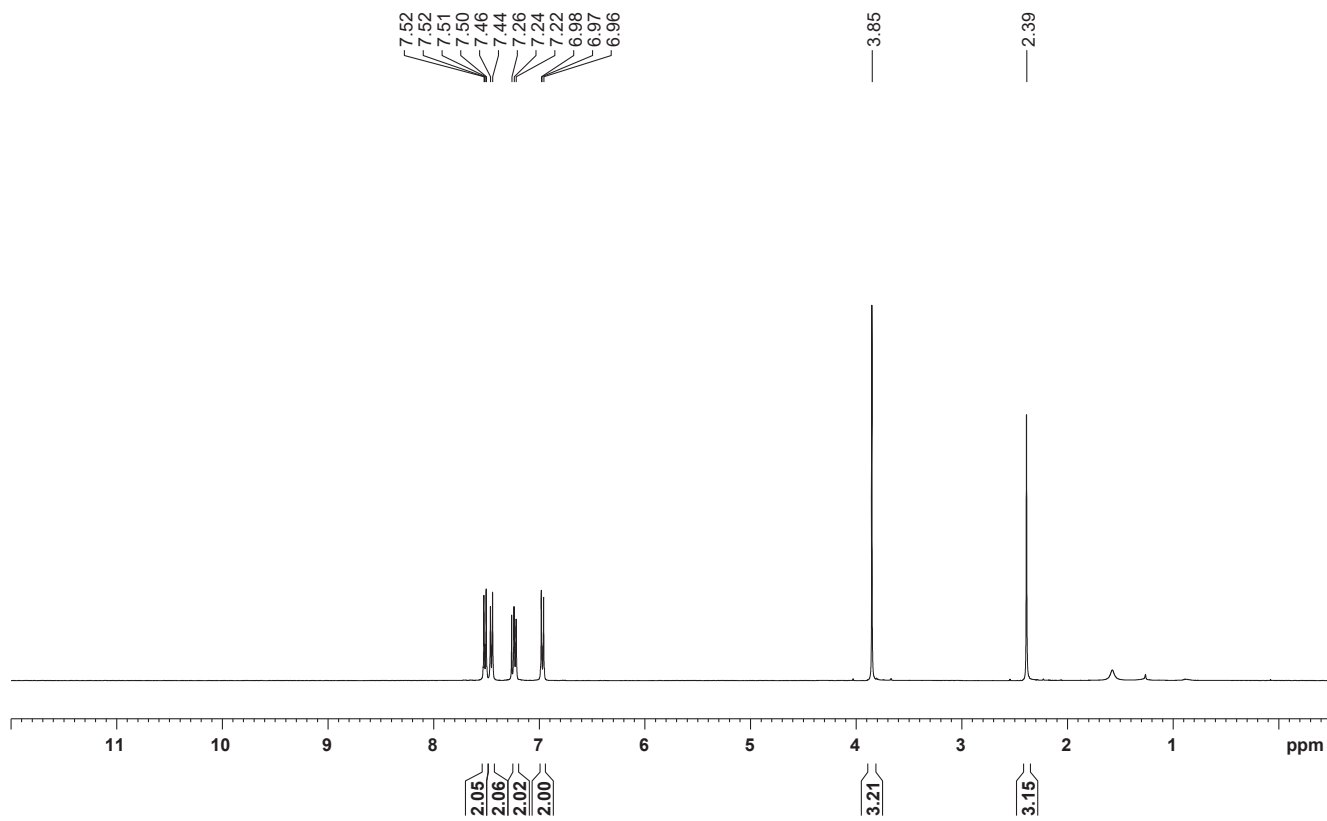

4-methoxy-4'-methyl-1,1'-biphenyl (7db)

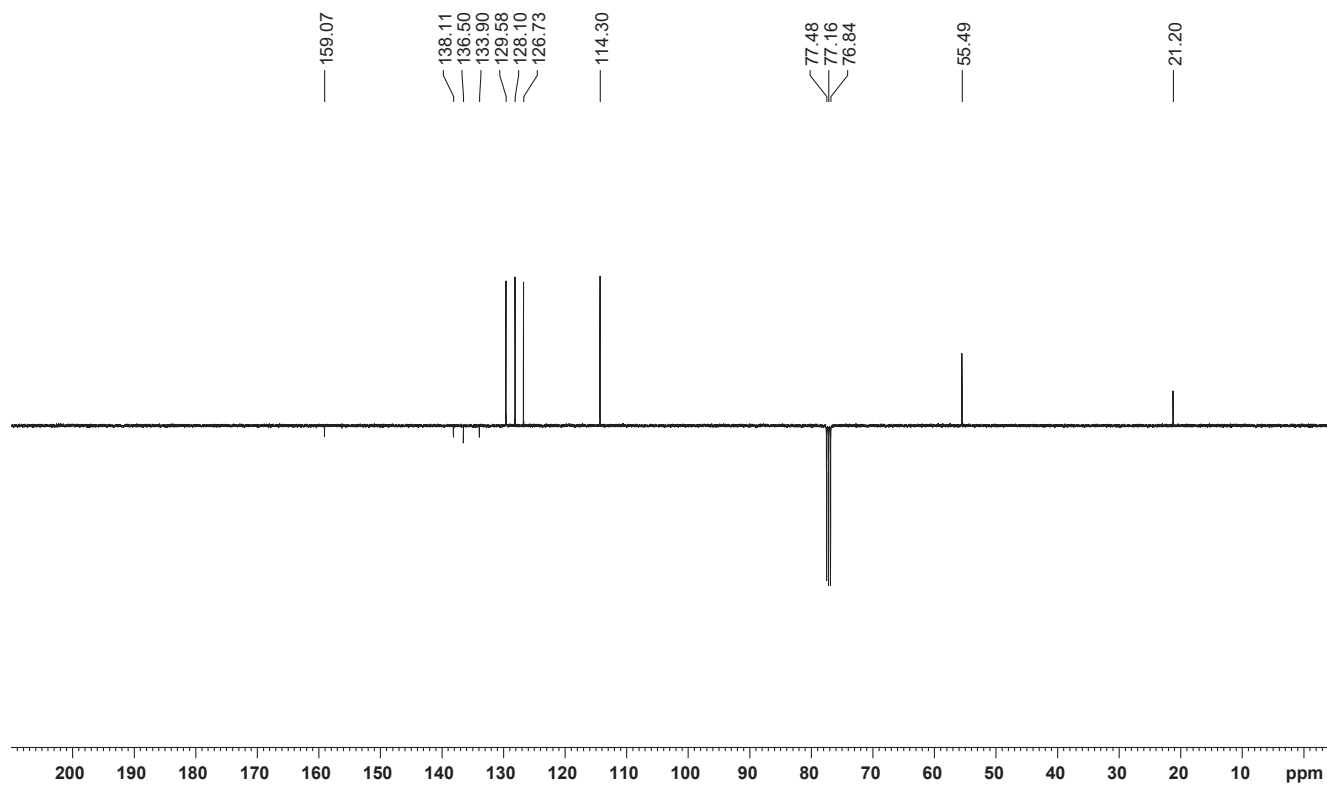

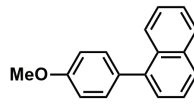

1-(4-methoxyphenyl)naphthalene (**7ib**)

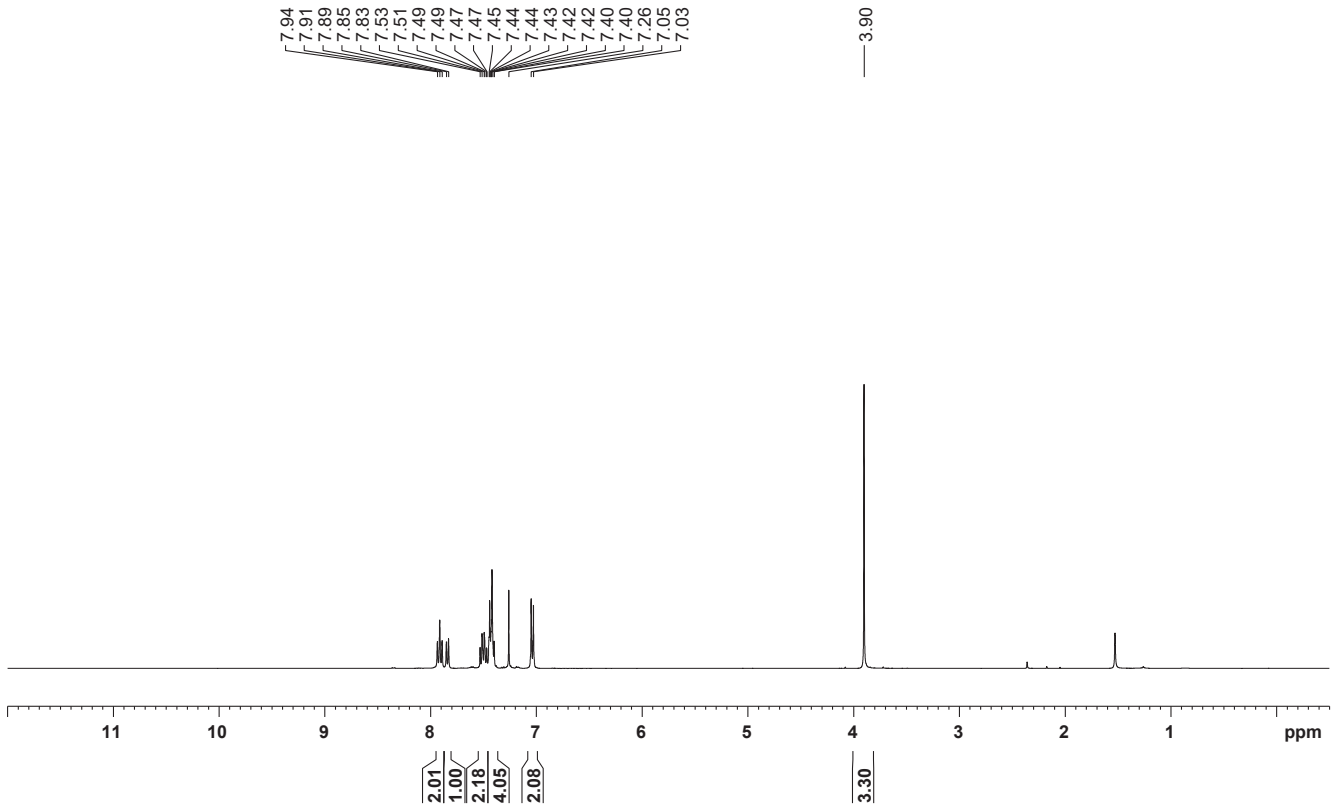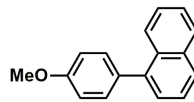

1-(4-methoxyphenyl)naphthalene (**7ib**)

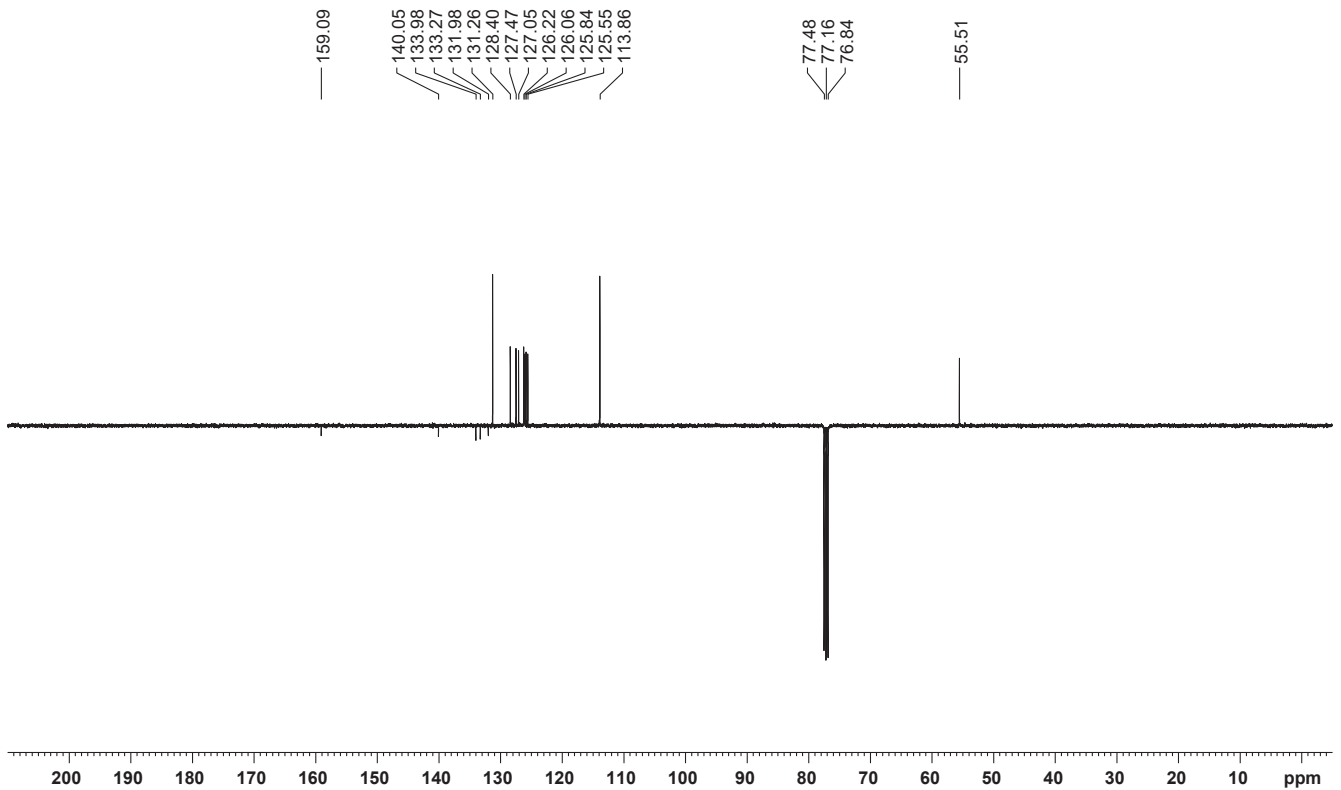



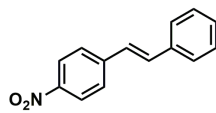

(E)-1-nitro-4-styrylbenzene (**8ea**)

8.20  
8.18  
7.62  
7.59  
7.53  
7.52  
7.39  
7.37  
7.36  
7.32  
7.31  
7.29  
7.26  
7.22  
7.14  
7.10

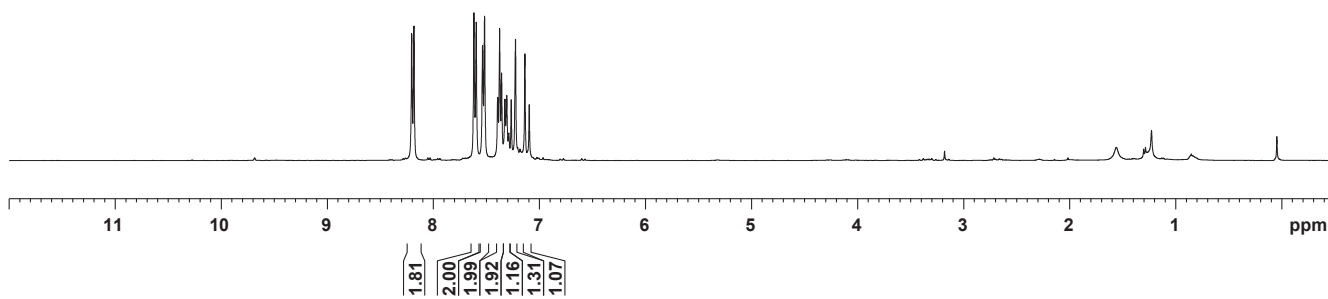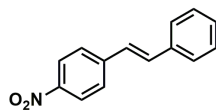

(E)-1-nitro-4-styrylbenzene (**8ea**)

146.91  
143.99  
136.31  
133.45  
129.04  
128.99  
127.16  
127.00  
126.42  
124.29

77.48  
77.16  
76.84

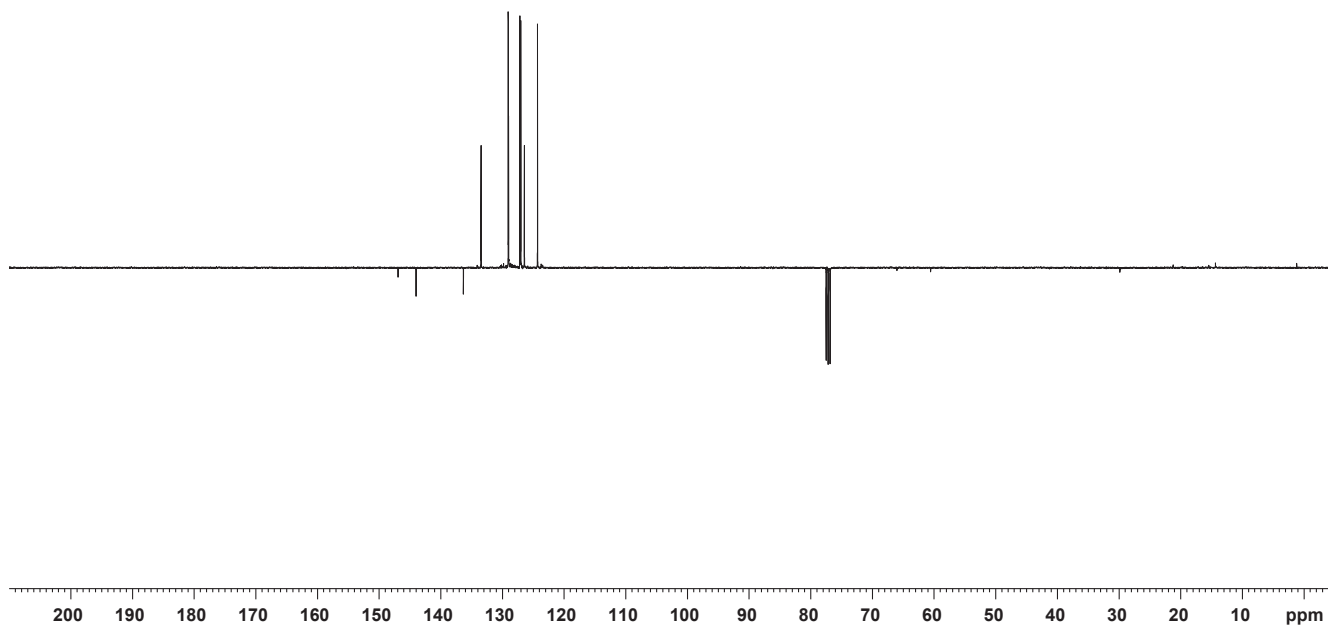

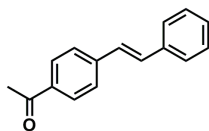

(E)-1-(4-styrylphenyl)ethanone (**8fa**)

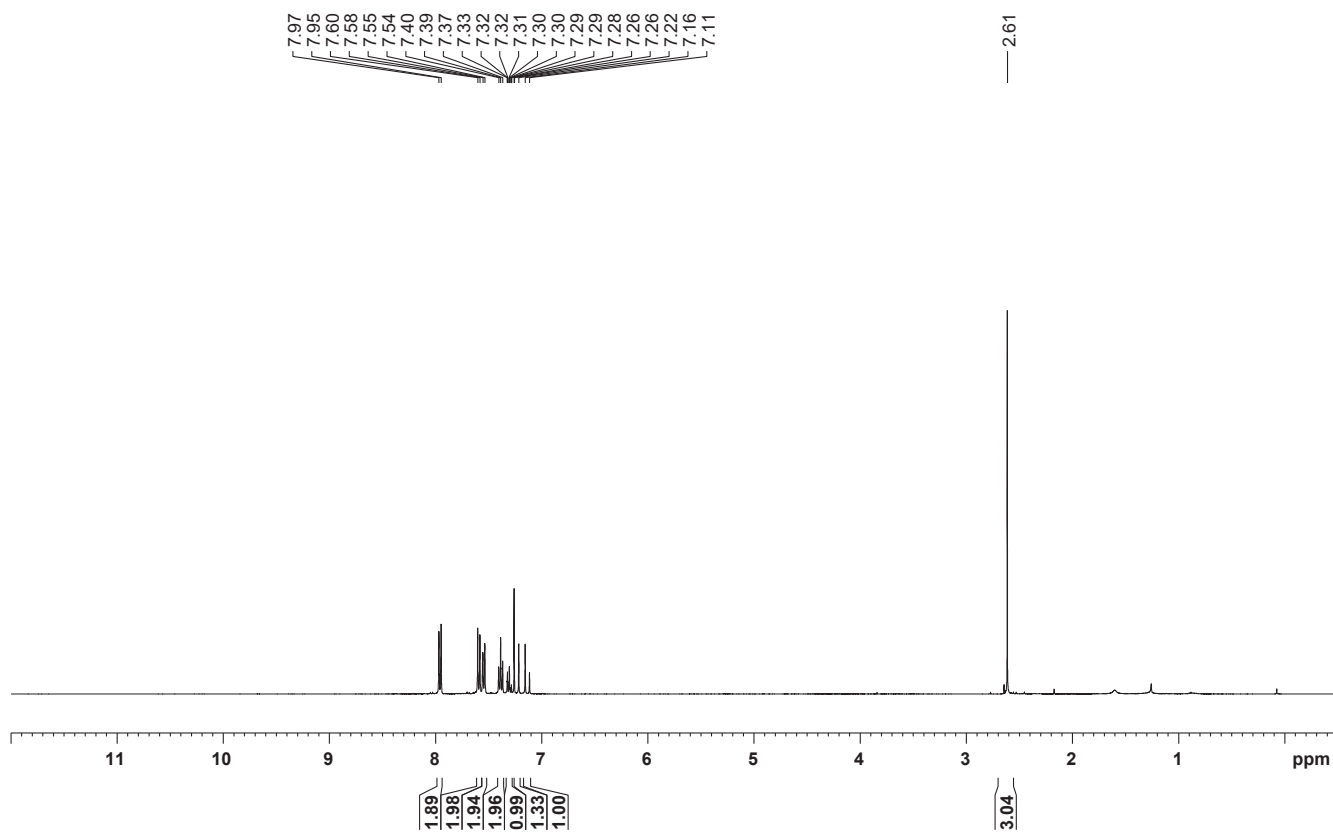

(E)-1-(4-styrylphenyl)ethanone (**8fa**)

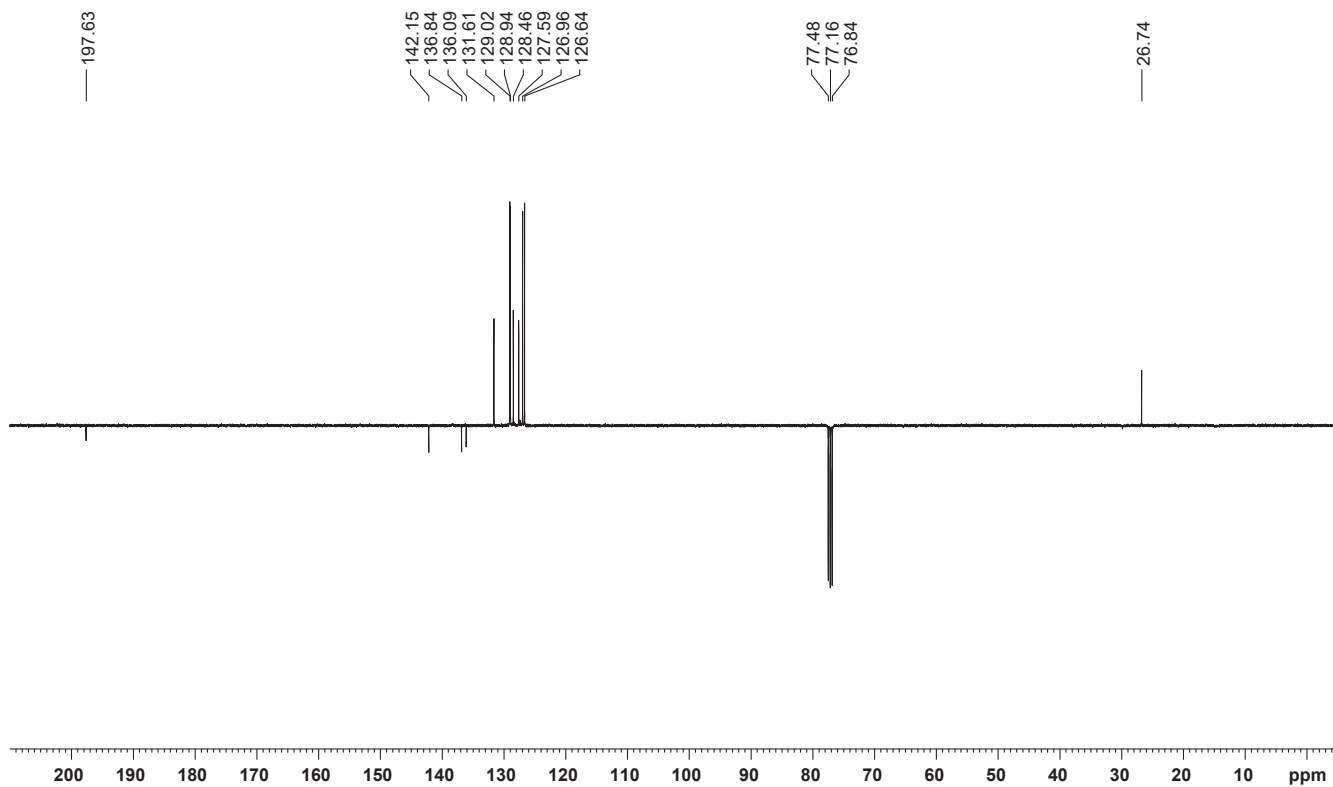

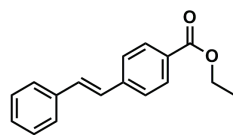

(E)-ethyl 4-styrylbenzoate (**8ga**)

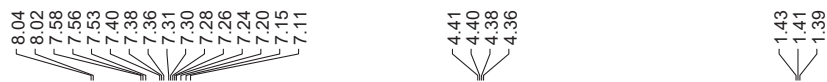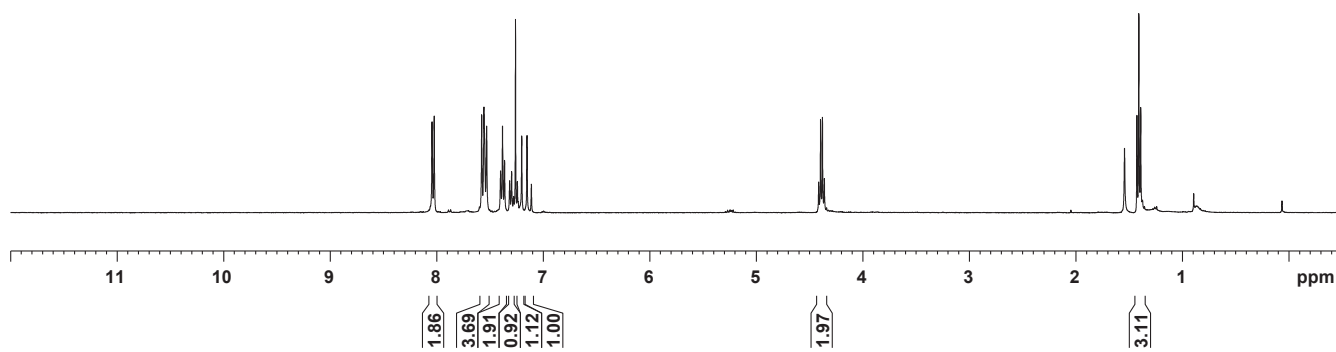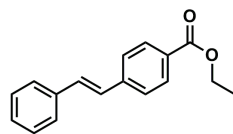

(E)-ethyl 4-styrylbenzoate (**8ga**)

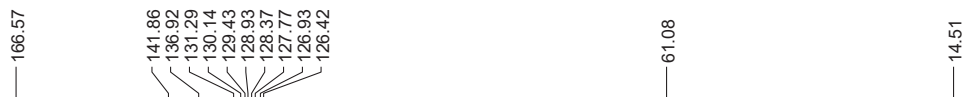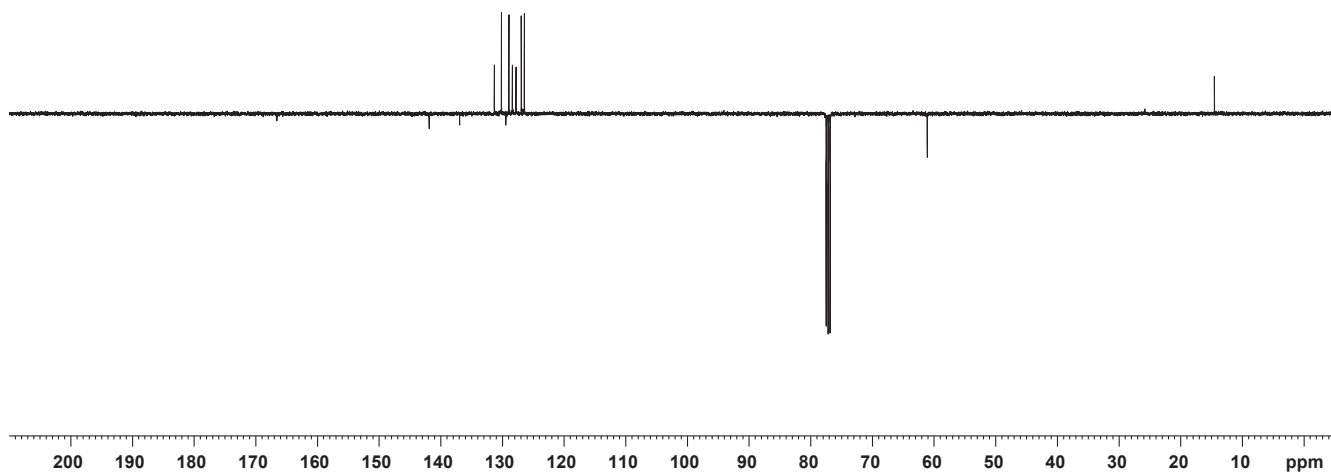

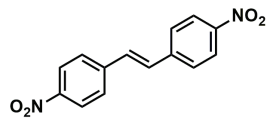

(E)-1,2-bis(4-nitrophenyl)ethene (**8jj**)

8.28  
8.26  
7.70  
7.68  
7.30  
7.26

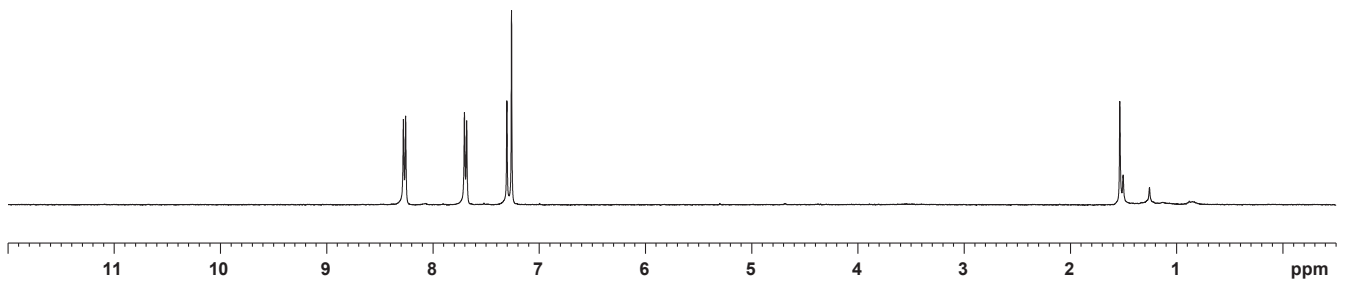

3.92  
3.97  
2.01

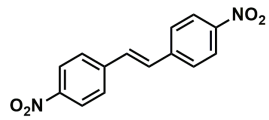

(E)-1,2-bis(4-nitrophenyl)ethene (**8jj**)

147.59  
142.62  
130.80  
127.64  
124.44

77.48  
77.16  
76.84

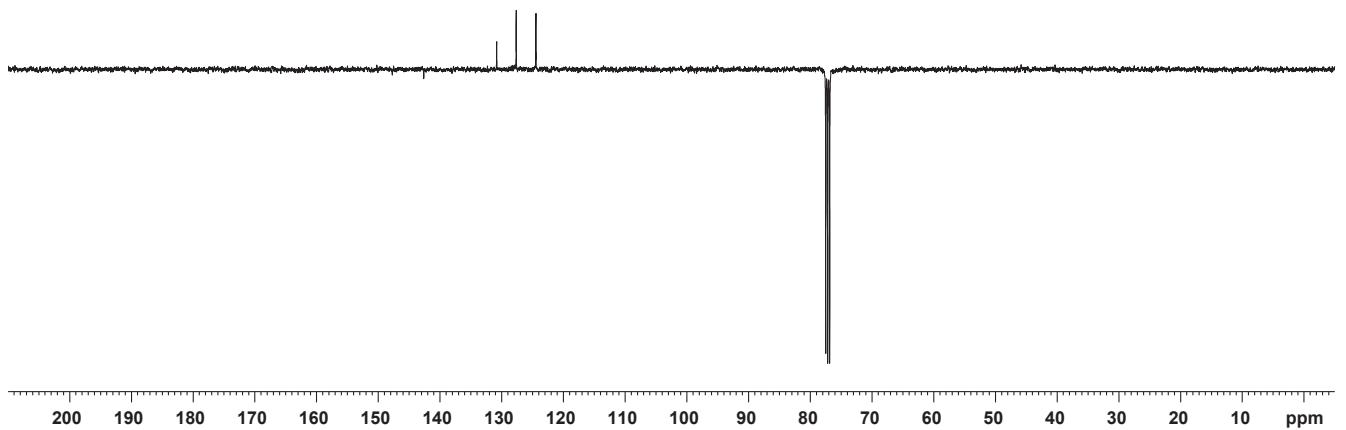

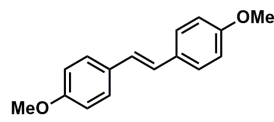

(E)-1,2-bis(4-methoxyphenyl)ethene (**8hh**)

7.44  
7.42  
7.26  
6.93  
6.90  
6.88  
3.83

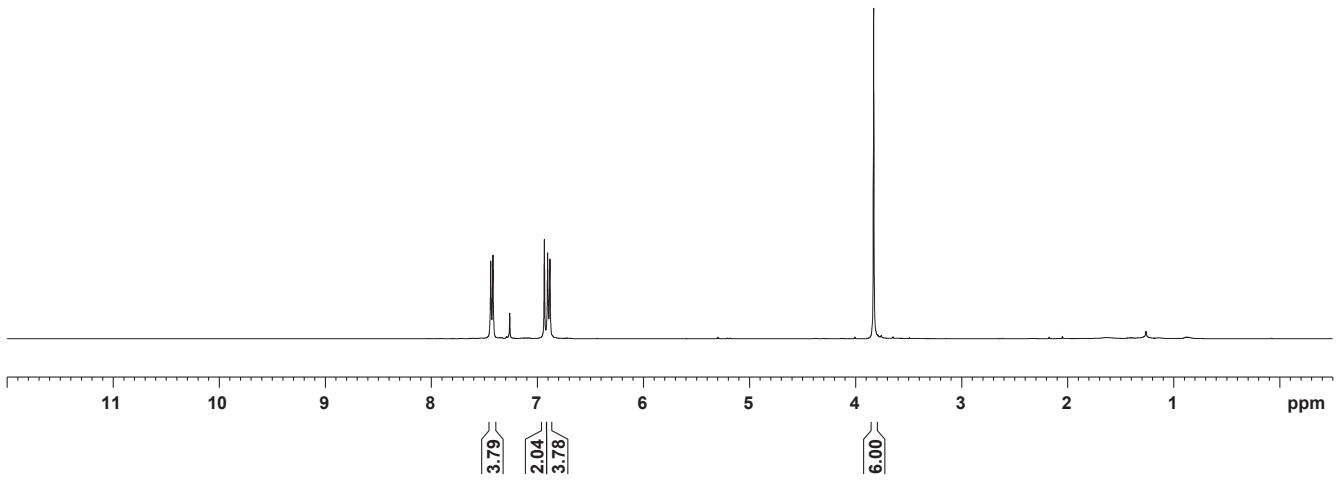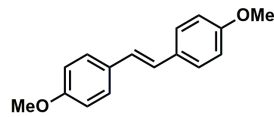

(E)-1,2-bis(4-methoxyphenyl)ethene (**8hh**)

159.15  
130.62  
127.55  
126.32  
114.25  
77.48  
77.16  
76.84  
55.47

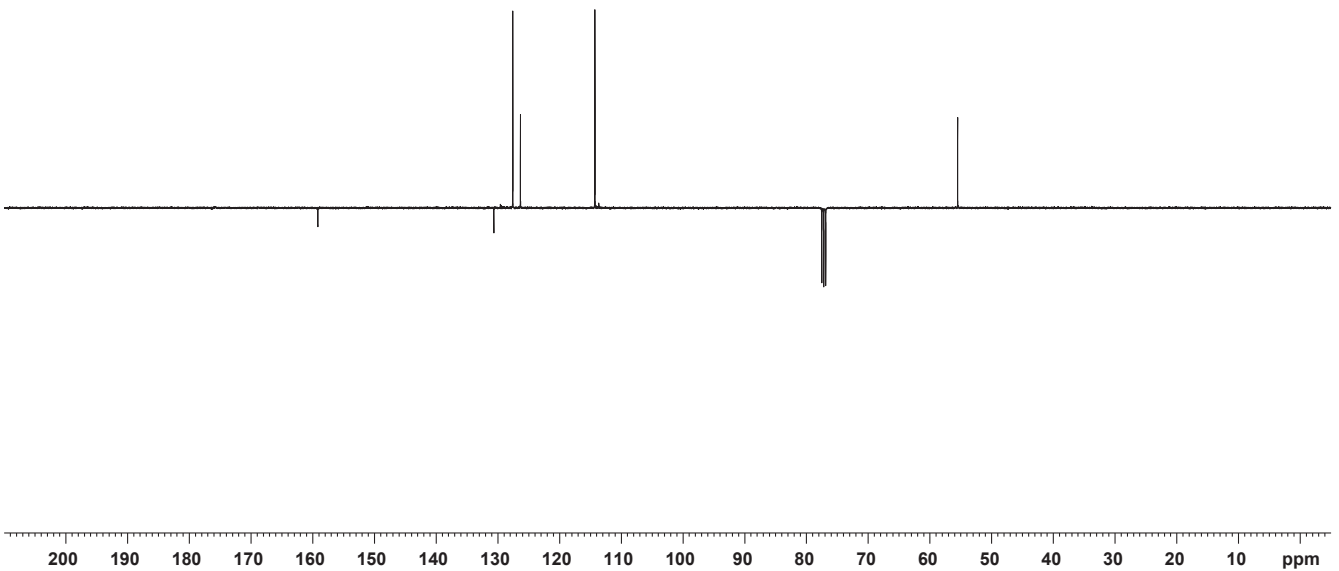

Supplement: d1gc01707a1.pdf [file d1gc01707a1.pdf]
